# Supplementary material for: Comparative Transcriptome Analysis of Litopenaeus vannamei Reveals That Triosephosphate Isomerase-Like Genes Play an Important Role During Decapod Iridescent Virus 1 Infection
Source: Front Immunol. 2020 Aug 28;11:1904. doi: 10.3389/fimmu.2020.01904 (PMC7485339; doi:10.3389/fimmu.2020.01904)
Supplement: Supplementary file 3 [file Table_3.xls]

Table S3 KEGG enrichment analysis
KEGG_A_class	KEGG_B_class	Pathway	Count (15902)	Pathway ID	Genes	KOs
Cellular Processes	Transport and catabolism	Endocytosis	794	ko04144	Unigene000183;Unigene000401;Unigene000678;Unigene000707;Unigene000907;Unigene001322;Unigene001407;Unigene001499;Unigene001517;Unigene001628;Unigene001815;Unigene001948;Unigene002047;Unigene002088;Unigene002363;Unigene002436;Unigene002452;Unigene002526;Unigene003423;Unigene003927;Unigene004161;Unigene004162;Unigene004251;Unigene004288;Unigene004372;Unigene004497;Unigene004516;Unigene005065;Unigene…	K11827+K11827+K00889+K01528+K03283+K12194+K18442+K04361+K03283+K06564+K12196+K12184+K12482+K07904+K12483+K07897+K18468+K04388+K12489+K04500+K12493+K12493+K19368+K12482+K11247+K04679+K03283+K07889+K03283+K18462+K04237+K04237+K07905+K03283+K05754+K05754+K07941+K06069+K18441+K12194+K03283+K04237+K12197+K11866+K17917+K18441+K04393+K18442+K02833+K02833+K04645+K17918+K12197+K12184+K07937+K12480+K11824+…
Genetic Information Processing	Translation	Ribosome	777	ko03010	Unigene000099;Unigene000217;Unigene000370;Unigene000834;Unigene000901;Unigene001244;Unigene001352;Unigene001591;Unigene001768;Unigene002113;Unigene002114;Unigene002135;Unigene002207;Unigene002354;Unigene002503;Unigene002504;Unigene002572;Unigene003332;Unigene003447;Unigene003497;Unigene003781;Unigene003835;Unigene004035;Unigene004113;Unigene004479;Unigene005108;Unigene005109;Unigene005238;Unigene…	K02997+K02930+K02943+K02984+K02936+K02915+K02962+K02938+K02996+K02998+K02998+K02960+K02946+K02971+K02949+K02949+K02875+K02924+K02993+K02974+K02908+K02995+K02907+K02870+K02936+K02929+K02929+K02978+K02926+K02865+K02865+K02923+K02923+K02905+K02891+K02989+K02989+K02975+K02975+K02935+K02915+K02981+K02901+K02962+K02957+K02910+K02868+K02917+K02912+K02926+K02997+K02977+K02957+K02873+K02998+K02985+K02874+…
Genetic Information Processing	Folding, sorting and degradation	Protein processing in endoplasmic reticulum	724	ko04141	Unigene000040;Unigene000322;Unigene000353;Unigene000501;Unigene000502;Unigene000877;Unigene000907;Unigene001000;Unigene001001;Unigene001002;Unigene001107;Unigene001308;Unigene001401;Unigene001517;Unigene002169;Unigene002219;Unigene002381;Unigene002476;Unigene002691;Unigene003009;Unigene003363;Unigene003954;Unigene004006;Unigene004233;Unigene004495;Unigene004516;Unigene004720;Unigene005162;Unigene…	K06689+K09530+K09503+K14008+K14008+K07953+K03283+K01230+K01230+K01230+K08054+K09490+K03868+K03283+K13251+K06689+K04440+K04523+K14004+K13989+K14007+K14007+K01230+K10636+K09481+K03283+K14019+K03283+K09540+K14019+K10636+K03283+K13250+K09584+K14005+K03868+K10575+K10575+K12670+K03283+K09481+K09584+K09503+K07953+K09525+K09027+K14012+K14012+K08054+K03347+K08054+K09487+K09487+K04523+K10956+K14006+K14016+…
Genetic Information Processing	Transcription	Spliceosome	680	ko03040	Unigene000038;Unigene000558;Unigene000897;Unigene000898;Unigene000907;Unigene001008;Unigene001009;Unigene001106;Unigene001458;Unigene001517;Unigene001706;Unigene001908;Unigene002133;Unigene002134;Unigene002543;Unigene002782;Unigene002824;Unigene003500;Unigene003509;Unigene003510;Unigene003518;Unigene003533;Unigene003534;Unigene004207;Unigene004516;Unigene005162;Unigene005215;Unigene005252;Unigene…	K12662+K12878+K12877+K12877+K03283+K12824+K12824+K11086+K12875+K03283+K12862+K11097+K11087+K11087+K12890+K12845+K06063+K12847+K12881+K12881+K12838+K12881+K12881+K12862+K03283+K03283+K12829+K12869+K12875+K12875+K03283+K12845+K12843+K12843+K12875+K12875+K12890+K03283+K12877+K12820+K12855+K12850+K12850+K12896+K12852+K12821+K12838+K12838+K11088+K12831+K11088+K11091+K12875+K12882+K12842+K03283+K12858+…
Genetic Information Processing	Translation	RNA transport	657	ko03013	Unigene000558;Unigene000797;Unigene000897;Unigene000898;Unigene001007;Unigene001084;Unigene001306;Unigene001346;Unigene001458;Unigene001461;Unigene001590;Unigene002240;Unigene002319;Unigene002320;Unigene002446;Unigene002691;Unigene002695;Unigene002959;Unigene003006;Unigene003225;Unigene003303;Unigene003459;Unigene003509;Unigene003510;Unigene003533;Unigene003534;Unigene003886;Unigene004527;Unigene…	K12878+K03251+K12877+K12877+K13171+K03260+K12172+K03254+K12875+K14289+K14289+K13114+K03250+K03250+K12160+K14004+K14289+K14317+K03259+K07936+K14311+K14283+K12881+K12881+K12881+K12881+K14310+K13131+K07936+K12875+K12875+K03260+K14298+K12875+K12875+K13126+K03240+K13174+K12877+K03254+K00974+K03246+K14299+K03259+K03113+K18645+K03260+K03260+K03259+K03250+K03250+K10577+K09291+K09291+K03248+K14293+K15516+…
Metabolism	Global and Overview	Carbon metabolism	602	ko01200	Unigene000278;Unigene000508;Unigene000989;Unigene001457;Unigene002245;Unigene002336;Unigene002874;Unigene003052;Unigene003374;Unigene003683;Unigene003756;Unigene003894;Unigene003895;Unigene004036;Unigene004146;Unigene004292;Unigene004327;Unigene005113;Unigene005114;Unigene005584;Unigene005646;Unigene005870;Unigene006079;Unigene006200;Unigene006331;Unigene006604;Unigene006737;Unigene006788;Unigene…	K00927+K00863+K00029+K00814+K00850+K01738+K01738+K00627+K01738+K00249+K00600+K00031+K00031+K00844+K01070+K01079+K07511+K01079+K01079+K01899+K00029+K14455+K01803+K00844+K00134+K00026+K00121+K00164+K01738+K01738+K00382+K01623+K00161+K19269+K01783+K00927+K00029+K07511+K00026+K01689+K00616+K01689+K00030+K00831+K00162+K00162+K11517+K00873+K00814+K00033+K00873+K00844+K11517+K11517+K01057+K01681+K00121+…
Genetic Information Processing	Folding, sorting and degradation	Ubiquitin mediated proteolysis	593	ko04120	Unigene000040;Unigene000136;Unigene001216;Unigene001217;Unigene001401;Unigene001444;Unigene001445;Unigene001596;Unigene002213;Unigene002219;Unigene002256;Unigene002345;Unigene002991;Unigene003390;Unigene003679;Unigene003803;Unigene004733;Unigene006064;Unigene006187;Unigene006536;Unigene006575;Unigene006576;Unigene007212;Unigene007213;Unigene007453;Unigene007497;Unigene007561;Unigene007666;Unigene…	K06689+K10594+K10583+K10583+K03868+K10612+K10612+K10144+K10610+K06689+K10684+K10604+K03359+K10260+K10609+K10595+K10596+K10609+K10688+K03868+K10575+K10575+K10590+K10590+K10699+K10573+K10685+K10579+K10595+K10595+K03347+K10609+K03869+K04506+K04649+K10581+K10581+K10577+K03178+K10687+K04506+K10573+K10583+K10575+K04506+K10143+K10143+K10582+K10588+K10588+K03870+K10592+K16060+K10597+K05633+K10688+K03353+…
Human Diseases	Cancers	Pathways in cancer	563	ko05200	Unigene000786;Unigene000858;Unigene000859;Unigene001374;Unigene001401;Unigene001499;Unigene001618;Unigene001634;Unigene001895;Unigene002087;Unigene002381;Unigene002526;Unigene002577;Unigene002965;Unigene002966;Unigene003046;Unigene003047;Unigene003120;Unigene003146;Unigene003406;Unigene003407;Unigene003470;Unigene003850;Unigene004083;Unigene004808;Unigene004980;Unigene006566;Unigene006567;Unigene…	K06244+K04438+K04438+K09848+K03868+K04361+K04166+K06067+K02353+K02677+K04440+K04388+K09097+K04469+K04469+K09592+K09592+K02620+K06624+K04364+K04364+K04345+K02206+K08043+K08737+K04345+K11220+K11220+K04411+K04411+K06240+K09592+K09592+K07860+K08046+K04496+K02833+K02833+K06244+K09291+K09291+K08530+K02677+K07299+K02219+K04453+K04453+K04635+K08732+K06067+K04496+K04496+K06626+K06240+K02353+K17454+K03870+…
Metabolism	Nucleotide metabolism	Purine metabolism	545	ko00230	Unigene000785;Unigene001333;Unigene001668;Unigene002057;Unigene002182;Unigene002420;Unigene002595;Unigene002883;Unigene004083;Unigene004922;Unigene005413;Unigene005830;Unigene006241;Unigene006471;Unigene006796;Unigene008206;Unigene008747;Unigene009262;Unigene009474;Unigene009475;Unigene009511;Unigene009882;Unigene010038;Unigene010362;Unigene010555;Unigene010837;Unigene010886;Unigene010911;Unigene…	K03013+K03012+K00759+K01952+K01952+K13296+K02685+K08048+K08043+K02327+K00939+K03019+K02327+K00106+K00940+K08046+K00856+K00088+K18437+K18437+K01939+K01081+K02684+K00939+K00759+K00873+K00940+K01756+K01756+K10808+K10808+K00873+K18436+K03006+K03007+K03012+K03012+K01835+K03006+K00940+K11787+K00939+K03010+K01081+K02327+K01587+K01587+K00856+K03013+K08043+K08043+K00364+K13987+K02328+K00939+K00939+K01835+…
Cellular Processes	Transport and catabolism	Phagosome	477	ko04145	Unigene000420;Unigene000923;Unigene000977;Unigene001107;Unigene001952;Unigene002160;Unigene002436;Unigene002551;Unigene002658;Unigene002828;Unigene003486;Unigene003961;Unigene004154;Unigene004224;Unigene004495;Unigene005065;Unigene005185;Unigene005533;Unigene006090;Unigene006975;Unigene007019;Unigene007111;Unigene008329;Unigene008658;Unigene008831;Unigene008884;Unigene009145;Unigene009352;Unigene…	K10089+K02150+K10413+K08054+K06472+K02155+K07897+K05692+K07375+K01368+K07374+K02153+K05692+K07375+K09481+K07889+K07375+K10414+K10068+K07375+K10416+K09481+K08054+K08054+K05692+K07374+K07375+K10956+K08008+K07374+K07374+K02155+K02146+K06752+K00914+K00914+K05654+K05692+K06752+K06751+K07375+K03661+K02152+K02152+K10956+K06856+K04392+K04392+K02147+K08008+K08008+K09481+K03662+K10414+K10414+K07887+K02155+…
Cellular Processes	Transport and catabolism	Lysosome	443	ko04142	Unigene000420;Unigene001129;Unigene001435;Unigene001476;Unigene001477;Unigene001628;Unigene001831;Unigene002160;Unigene002268;Unigene002828;Unigene003003;Unigene004416;Unigene004944;Unigene004945;Unigene004983;Unigene005895;Unigene006183;Unigene006794;Unigene007341;Unigene007984;Unigene007985;Unigene008701;Unigene009075;Unigene009284;Unigene009326;Unigene009947;Unigene009948;Unigene010019;Unigene…	K10089+K01373+K12382+K12385+K12385+K06564+K13289+K02155+K12309+K01368+K12393+K12404+K06497+K06497+K05642+K10532+K01373+K01366+K12385+K01275+K01275+K12399+K01363+K12373+K04645+K12404+K12404+K12392+K01366+K02155+K02146+K12316+K12394+K12384+K12401+K01369+K01052+K12397+K10532+K03661+K01379+K12387+K12387+K01379+K01565+K01074+K03662+K12301+K12399+K02155+K01363+K06497+K12398+K12391+K01379+K01379+K04644+…
Environmental Information Processing	Signal transduction	PI3K-Akt signaling pathway	442	ko04151	Unigene000786;Unigene001499;Unigene002844;Unigene003146;Unigene003406;Unigene003407;Unigene003850;Unigene005532;Unigene006099;Unigene006100;Unigene006916;Unigene007378;Unigene008754;Unigene009023;Unigene009024;Unigene009274;Unigene009350;Unigene009351;Unigene009644;Unigene010614;Unigene010615;Unigene010820;Unigene012089;Unigene012246;Unigene012414;Unigene012415;Unigene013269;Unigene013983;Unigene…	K06244+K04361+K11584+K06624+K04364+K04364+K02206+K04354+K06276+K06276+K05057+K06240+K03259+K02833+K02833+K06244+K05072+K05072+K06238+K05130+K05130+K07204+K06626+K06240+K06483+K06483+K08270+K16197+K04450+K02580+K16333+K16333+K06856+K04392+K04392+K05635+K07207+K07207+K05130+K05072+K05071+K04374+K01110+K07208+K07208+K07210+K10605+K16339+K16339+K11584+K05461+K05461+K02089+K04371+K04371+K16332+K06244+…
Genetic Information Processing	Translation	mRNA surveillance pathway	436	ko03015	Unigene000897;Unigene000898;Unigene001007;Unigene001458;Unigene001729;Unigene002240;Unigene002844;Unigene003063;Unigene003509;Unigene003510;Unigene003533;Unigene003534;Unigene003541;Unigene003542;Unigene005274;Unigene005275;Unigene005532;Unigene005837;Unigene006058;Unigene006316;Unigene006317;Unigene006475;Unigene006481;Unigene006863;Unigene006977;Unigene007402;Unigene008092;Unigene008158;Unigene…	K12877+K12877+K13171+K12875+K14376+K13114+K11584+K14411+K12881+K12881+K12881+K12881+K14409+K14409+K12875+K12875+K04354+K06100+K14396+K12875+K12875+K13126+K14401+K06269+K12877+K14406+K03267+K14396+K14396+K14396+K06269+K12875+K12882+K14409+K14409+K14409+K04382+K14398+K12877+K12812+K14403+K15544+K03265+K06100+K13126+K14404+K14404+K04382+K08873+K13126+K12877+K12877+K03456+K11584+K14411+K06269+K06269+…
Environmental Information Processing	Signal transduction	MAPK signaling pathway	412	ko04010	Unigene000858;Unigene000859;Unigene000907;Unigene001064;Unigene001065;Unigene001066;Unigene001270;Unigene001499;Unigene001517;Unigene001691;Unigene002087;Unigene002381;Unigene002526;Unigene002725;Unigene002965;Unigene002966;Unigene003154;Unigene003176;Unigene003406;Unigene003407;Unigene003430;Unigene003470;Unigene004031;Unigene004032;Unigene004516;Unigene004980;Unigene005162;Unigene005815;Unigene…	K04438+K04438+K03283+K04855+K04855+K04855+K04459+K04361+K03283+K04519+K02677+K04440+K04388+K04460+K04469+K04469+K04442+K04441+K04364+K04364+K08052+K04345+K04468+K04468+K03283+K04345+K03283+K03283+K04368+K04411+K04411+K04429+K08053+K04376+K07860+K04455+K04393+K04412+K02833+K02833+K06268+K04419+K04419+K02677+K04404+K04453+K04453+K04461+K03283+K04423+K04431+K04372+K04372+K04452+K04450+K02580+K04392+…
Metabolism	Energy metabolism	Oxidative phosphorylation	410	ko00190	Unigene000242;Unigene000817;Unigene000923;Unigene000962;Unigene002110;Unigene002160;Unigene003015;Unigene003130;Unigene003543;Unigene003544;Unigene003961;Unigene004118;Unigene004423;Unigene004573;Unigene004960;Unigene004997;Unigene005301;Unigene005919;Unigene005999;Unigene006301;Unigene006560;Unigene007066;Unigene007412;Unigene007413;Unigene008097;Unigene008107;Unigene009116;Unigene010174;Unigene…	K02266+K02133+K02150+K00411+K00417+K02155+K00416+K02128+K03939+K03939+K02153+K03953+K00417+K03937+K02133+K03943+K03955+K02261+K01507+K02266+K02135+K02132+K11351+K11351+K03966+K02267+K03956+K00417+K02155+K02273+K00415+K03966+K02134+K02146+K03934+K03661+K02152+K02152+K02135+K00413+K03940+K03940+K00411+K03965+K00418+K02147+K03953+K02140+K03662+K02133+K02270+K03942+K02132+K00411+K02155+K02133+K02134+…
Human Diseases	Infectious diseases	HTLV-I infection	405	ko05166	Unigene001107;Unigene001895;Unigene002526;Unigene002965;Unigene002966;Unigene002991;Unigene003261;Unigene003470;Unigene003537;Unigene003662;Unigene004083;Unigene004922;Unigene004980;Unigene006080;Unigene006241;Unigene006733;Unigene007926;Unigene008206;Unigene008329;Unigene008932;Unigene008933;Unigene008934;Unigene009023;Unigene009024;Unigene009318;Unigene010124;Unigene010167;Unigene011829;Unigene…	K08054+K02353+K04388+K04469+K04469+K03359+K04728+K04345+K08874+K15307+K08043+K02327+K04345+K15041+K02327+K02180+K04376+K08046+K08054+K12076+K12076+K12076+K02833+K02833+K06268+K07299+K06635+K06752+K02353+K17454+K04728+K04728+K06752+K02678+K06751+K09027+K04450+K02580+K02327+K16333+K16333+K03353+K16334+K08874+K08874+K02235+K03350+K04374+K15308+K08043+K08043+K07210+K05863+K02328+K06637+K07936+K02089+…
Metabolism	Global and Overview	Biosynthesis of amino acids	401	ko01230	Unigene000278;Unigene000801;Unigene000878;Unigene001457;Unigene002245;Unigene002336;Unigene002874;Unigene003057;Unigene003374;Unigene003756;Unigene003894;Unigene003895;Unigene004292;Unigene005113;Unigene005114;Unigene005870;Unigene006079;Unigene006331;Unigene007258;Unigene007259;Unigene007353;Unigene007479;Unigene007566;Unigene008104;Unigene008303;Unigene009266;Unigene009691;Unigene010159;Unigene…	K00927+K14677+K00815+K00814+K00850+K01738+K01738+K00264+K01738+K00600+K00031+K00031+K01079+K01079+K01079+K14455+K01803+K00134+K01738+K01738+K01915+K14085+K01623+K01783+K00927+K01689+K00616+K01689+K00030+K00831+K00873+K00814+K00873+K01620+K01681+K14455+K01915+K01915+K00600+K00600+K01079+K00826+K01783+K00600+K01623+K14455+K00264+K00850+K00789+K01623+K01758+K00134+K00600+K00264+K01647+K00927+K01738+…
Environmental Information Processing	Signal transduction	FoxO signaling pathway	396	ko04068	Unigene000484;Unigene000485;Unigene000562;Unigene001499;Unigene002381;Unigene002526;Unigene003146;Unigene003176;Unigene003261;Unigene003406;Unigene003407;Unigene003503;Unigene003850;Unigene003927;Unigene004031;Unigene004032;Unigene004629;Unigene006099;Unigene006100;Unigene006757;Unigene006758;Unigene006960;Unigene006973;Unigene006974;Unigene006996;Unigene006997;Unigene007581;Unigene007632;Unigene…	K08341+K08341+K08863+K04361+K04440+K04388+K06624+K04441+K04728+K04364+K04364+K07199+K02206+K04500+K04468+K04468+K10305+K06276+K06276+K08341+K08341+K04368+K04411+K04411+K07198+K07198+K08861+K08341+K08341+K07198+K07198+K02833+K02833+K04564+K15464+K05072+K05072+K04361+K08960+K08960+K04368+K08861+K04728+K04728+K03875+K05072+K07199+K04441+K04441+K01110+K08341+K08341+K08341+K04371+K04371+K16332+K05868+…
Cellular Processes	Cellular commiunity	Focal adhesion	376	ko04510	Unigene000786;Unigene000858;Unigene000859;Unigene001076;Unigene001294;Unigene001499;Unigene002087;Unigene002381;Unigene002509;Unigene003406;Unigene003407;Unigene005028;Unigene005527;Unigene005528;Unigene006099;Unigene006100;Unigene006863;Unigene007378;Unigene007386;Unigene008115;Unigene008297;Unigene009023;Unigene009024;Unigene009274;Unigene009644;Unigene009821;Unigene009873;Unigene010073;Unigene…	K06244+K04438+K04438+K06273+K05700+K04361+K02677+K04440+K06277+K04364+K04364+K12329+K05699+K05699+K06276+K06276+K06269+K06240+K06275+K07860+K04393+K02833+K02833+K06244+K06238+K06269+K05733+K02677+K05740+K05740+K05699+K06240+K06483+K06483+K05692+K06270+K16060+K05730+K05703+K05703+K04392+K04392+K16060+K05635+K13709+K13709+K05704+K05700+K05734+K05734+K06237+K01110+K06273+K05692+K05692+K04371+K04371+…
Environmental Information Processing	Signal transduction	Phosphatidylinositol signaling system	366	ko04070	Unigene000022;Unigene000678;Unigene000938;Unigene002087;Unigene002238;Unigene003199;Unigene004228;Unigene004444;Unigene004815;Unigene004907;Unigene006553;Unigene006787;Unigene007191;Unigene008536;Unigene009198;Unigene009199;Unigene009512;Unigene009900;Unigene010073;Unigene010136;Unigene010140;Unigene010272;Unigene011019;Unigene011992;Unigene011993;Unigene012122;Unigene012231;Unigene012232;Unigene…	K02183+K00889+K15909+K02677+K00920+K05861+K02183+K00901+K00901+K05858+K02183+K01099+K02183+K02183+K18082+K18082+K13711+K02183+K02677+K00923+K02183+K13711+K15909+K00901+K00901+K02183+K00914+K00914+K05858+K00913+K02183+K01092+K00888+K00888+K04958+K01110+K00923+K02183+K18081+K04960+K00889+K02183+K02183+K02677+K02183+K02183+K00920+K00888+K02183+K02183+K00922+K02183+K05857+K00981+K00915+K02183+K02183+…
Human Diseases	Infectious diseases	Epstein-Barr virus infection	365	ko05169	Unigene000907;Unigene001324;Unigene001333;Unigene001517;Unigene001634;Unigene002381;Unigene002965;Unigene002966;Unigene003146;Unigene003151;Unigene003152;Unigene003176;Unigene003470;Unigene003850;Unigene003946;Unigene003947;Unigene004516;Unigene004980;Unigene005830;Unigene006181;Unigene008157;Unigene008241;Unigene008532;Unigene009091;Unigene010262;Unigene010268;Unigene010269;Unigene010348;Unigene…	K03283+K05411+K03012+K03283+K06067+K04440+K04469+K04469+K06624+K03064+K03064+K04441+K04345+K02206+K08891+K08891+K03283+K04345+K03019+K06065+K04455+K03036+K03028+K03039+K02861+K15978+K15978+K04404+K06067+K03283+K05410+K06752+K06065+K06065+K06065+K03007+K16197+K06751+K04450+K02580+K03036+K03029+K06856+K06053+K03875+K06067+K06065+K03013+K04441+K04441+K06063+K04730+K04730+K11859+K03115+K07210+K03033+…
Cellular Processes	Cell motility	Regulation of actin cytoskeleton	358	ko04810	Unigene000678;Unigene000858;Unigene000859;Unigene001080;Unigene001081;Unigene001251;Unigene001294;Unigene001489;Unigene001490;Unigene001499;Unigene002238;Unigene004718;Unigene005028;Unigene005527;Unigene005528;Unigene005943;Unigene006030;Unigene006766;Unigene006863;Unigene008115;Unigene008297;Unigene009023;Unigene009024;Unigene009821;Unigene009873;Unigene010154;Unigene010155;Unigene010163;Unigene…	K00889+K04438+K04438+K05729+K05729+K05741+K05700+K05767+K05767+K04361+K00920+K05768+K12329+K05699+K05699+K05754+K05754+K05762+K06269+K07860+K04393+K02833+K02833+K06269+K05733+K05740+K05740+K05627+K05749+K05747+K05699+K05752+K05766+K06483+K06483+K05692+K06270+K05730+K05755+K04392+K04392+K05704+K05700+K05734+K05734+K05627+K05767+K05692+K05692+K05747+K07532+K04371+K04371+K00889+K04366+K04366+K05756+…
Metabolism	Nucleotide metabolism	Pyrimidine metabolism	352	ko00240	Unigene000025;Unigene000785;Unigene001333;Unigene002595;Unigene004922;Unigene005830;Unigene006241;Unigene006796;Unigene008806;Unigene009563;Unigene009564;Unigene009882;Unigene010038;Unigene010253;Unigene010886;Unigene011186;Unigene011187;Unigene011715;Unigene012168;Unigene012431;Unigene012432;Unigene013046;Unigene014048;Unigene014913;Unigene015030;Unigene015103;Unigene016477;Unigene016976;Unigene…	K00876+K03013+K03012+K02685+K02327+K03019+K02327+K00940+K01520+K00876+K00876+K01081+K02684+K00876+K00940+K10808+K10808+K03006+K03007+K03012+K03012+K03006+K00940+K03010+K01081+K02327+K03013+K00943+K02328+K03006+K00876+K00560+K01493+K02326+K03009+K00876+K03010+K01520+K03506+K00384+K03019+K03019+K00940+K10808+K10808+K01081+K13421+K00857+K01511+K00758+K03027+K12304+K12304+K00940+K01081+K03006+K03007+…
Human Diseases	Infectious diseases	Influenza A	348	ko05164	Unigene000907;Unigene001221;Unigene001324;Unigene001465;Unigene001517;Unigene001691;Unigene002381;Unigene003176;Unigene004122;Unigene004516;Unigene005537;Unigene005538;Unigene005815;Unigene006566;Unigene006567;Unigene006957;Unigene007265;Unigene007958;Unigene008158;Unigene008163;Unigene008512;Unigene010614;Unigene010615;Unigene011119;Unigene011448;Unigene011829;Unigene012956;Unigene013499;Unigene…	K03283+K04733+K05411+K04733+K03283+K04519+K04440+K04441+K04733+K03283+K04722+K04722+K03283+K11220+K11220+K05132+K15042+K04733+K14396+K04733+K15044+K05130+K05130+K03283+K05410+K06752+K04722+K05692+K06752+K04733+K04450+K02580+K14404+K14404+K05130+K04733+K04733+K04441+K04441+K04733+K10652+K08738+K04733+K05692+K05692+K04733+K04733+K15047+K04371+K04371+K11219+K04733+K14297+K14297+K04456+K04366+K04366+…
Cellular Processes	Transport and catabolism	Peroxisome	345	ko04146	Unigene001320;Unigene002132;Unigene003189;Unigene003316;Unigene003317;Unigene003815;Unigene003894;Unigene003895;Unigene004049;Unigene004488;Unigene004899;Unigene005822;Unigene006471;Unigene006962;Unigene007166;Unigene008580;Unigene008581;Unigene009103;Unigene010745;Unigene011194;Unigene011753;Unigene012146;Unigene012147;Unigene016158;Unigene016311;Unigene016312;Unigene017964;Unigene018416;Unigene…	K12663+K07513+K13239+K00306+K00306+K13352+K00031+K00031+K13279+K11147+K12663+K13348+K00106+K01897+K00232+K00232+K00232+K04564+K11517+K11187+K04565+K11517+K11517+K04565+K01897+K01897+K13344+K00649+K01897+K13355+K13349+K11147+K01897+K01897+K04565+K11187+K07513+K13239+K04565+K01897+K11992+K01897+K00232+K00106+K00106+K13354+K00803+K03781+K13348+K13348+K04565+K00477+K11517+K11517+K11517+K01640+K13347+…
Organismal Systems	Endocrine system	Insulin signaling pathway	340	ko04910	Unigene000022;Unigene000029;Unigene000856;Unigene000857;Unigene000858;Unigene000859;Unigene000938;Unigene001447;Unigene002381;Unigene002420;Unigene002509;Unigene003006;Unigene003406;Unigene003407;Unigene003470;Unigene003503;Unigene004036;Unigene004228;Unigene004980;Unigene005310;Unigene006099;Unigene006100;Unigene006200;Unigene006863;Unigene007191;Unigene008754;Unigene009023;Unigene009024;Unigene…	K02183+K05695+K07192+K07192+K04438+K04438+K15909+K11262+K04440+K13296+K06277+K03259+K04364+K04364+K04345+K07199+K00844+K02183+K04345+K04739+K06276+K06276+K00844+K06269+K02183+K03259+K02833+K02833+K03259+K06269+K07204+K15909+K00844+K04372+K04372+K07204+K04739+K11262+K02183+K07207+K07207+K07195+K07208+K07208+K00844+K02183+K07192+K04371+K04371+K04456+K04366+K04366+K04688+K04688+K06269+K02991+K04707+…
Human Diseases	Endocrine and metabolic diseases	Insulin resistance	337	ko04931	Unigene000029;Unigene000630;Unigene002087;Unigene002381;Unigene002674;Unigene003503;Unigene003916;Unigene006099;Unigene006100;Unigene006863;Unigene006996;Unigene006997;Unigene007769;Unigene008011;Unigene008455;Unigene008456;Unigene009090;Unigene009821;Unigene010068;Unigene010073;Unigene010124;Unigene014481;Unigene014592;Unigene015072;Unigene015316;Unigene015317;Unigene016258;Unigene016515;Unigene…	K05695+K15719+K02677+K04440+K00820+K07199+K15719+K06276+K06276+K06269+K07198+K07198+K09667+K09113+K07198+K07198+K00820+K06269+K06068+K02677+K07299+K09113+K02580+K07293+K16333+K16333+K19518+K08765+K06068+K06068+K06269+K07199+K01110+K06269+K04456+K07299+K04688+K04688+K06269+K04456+K05695+K07197+K02677+K19518+K03083+K07198+K07198+K04688+K03083+K04373+K03083+K03083+K03083+K04373+K04373+K00922+K01596+…
Human Diseases	Cancers	Proteoglycans in cancer	331	ko05205	Unigene001499;Unigene002087;Unigene003176;Unigene003406;Unigene003407;Unigene003470;Unigene004473;Unigene004944;Unigene004945;Unigene004980;Unigene005028;Unigene006099;Unigene006100;Unigene006766;Unigene006863;Unigene007622;Unigene008717;Unigene009023;Unigene009024;Unigene010073;Unigene013210;Unigene013499;Unigene013615;Unigene015072;Unigene015492;Unigene015493;Unigene016140;Unigene016607;Unigene…	K04361+K02677+K04441+K04364+K04364+K04345+K08107+K06497+K06497+K04345+K12329+K06276+K06276+K05762+K06269+K16338+K03685+K02833+K02833+K02677+K10380+K05692+K06270+K07293+K04392+K04392+K02235+K05704+K04515+K04441+K04441+K07532+K04371+K04371+K04960+K04456+K13375+K04366+K04366+K08107+K04377+K04707+K04456+K02677+K06257+K06106+K06106+K05760+K04369+K05692+K08007+K05692+K06588+K16866+K06487+K05760+K05760+…
Environmental Information Processing	Signal transduction	Wnt signaling pathway	327	ko04310	Unigene001401;Unigene001895;Unigene002087;Unigene002381;Unigene003120;Unigene003470;Unigene004031;Unigene004032;Unigene004907;Unigene004980;Unigene006536;Unigene006694;Unigene008115;Unigene008351;Unigene008411;Unigene008888;Unigene009318;Unigene009780;Unigene010021;Unigene010073;Unigene010671;Unigene010834;Unigene011748;Unigene011749;Unigene012515;Unigene013057;Unigene013058;Unigene013102;Unigene…	K03868+K02353+K02677+K04440+K02620+K04345+K04468+K04468+K05858+K04345+K03868+K01397+K07860+K03347+K04496+K04506+K06268+K03068+K04506+K02677+K04506+K10162+K04496+K04496+K02353+K08960+K08960+K02157+K04427+K04508+K05858+K04392+K04392+K02620+K03868+K03868+K02235+K04492+K04507+K03115+K03115+K04515+K03115+K01558+K04498+K02157+K04377+K03097+K17333+K17333+K17333+K02677+K08960+K03115+K03115+K03068+K03083+…
Genetic Information Processing	Folding, sorting and degradation	RNA degradation	325	ko03018	Unigene001820;Unigene002222;Unigene002245;Unigene006422;Unigene006475;Unigene007219;Unigene007220;Unigene007428;Unigene007481;Unigene007959;Unigene009005;Unigene009006;Unigene009260;Unigene009266;Unigene009358;Unigene010159;Unigene010397;Unigene010694;Unigene011499;Unigene013108;Unigene013422;Unigene013928;Unigene014018;Unigene014088;Unigene014853;Unigene015322;Unigene015880;Unigene016087;Unigene…	K12581+K14443+K00850+K12581+K13126+K12597+K12597+K12619+K14443+K14442+K12581+K12581+K12581+K01689+K12591+K01689+K12585+K12586+K12572+K12605+K10643+K14443+K12581+K04077+K12624+K13126+K13126+K12581+K12622+K12626+K12605+K12591+K03514+K12598+K12607+K14443+K00850+K12617+K12581+K12602+K12617+K12625+K12625+K01689+K01689+K04077+K04077+K04077+K04077+K04043+K12614+K03514+K12627+K12627+K12602+K12626+K12626+…
Genetic Information Processing	Translation	Ribosome biogenesis in eukaryotes	324	ko03008	Unigene000820;Unigene000864;Unigene001799;Unigene001800;Unigene001937;Unigene002782;Unigene003225;Unigene003993;Unigene004410;Unigene004883;Unigene005906;Unigene007428;Unigene007697;Unigene008717;Unigene008828;Unigene010423;Unigene013449;Unigene013456;Unigene016468;Unigene016771;Unigene016953;Unigene017006;Unigene017007;Unigene017807;Unigene018065;Unigene018603;Unigene019070;Unigene020087;Unigene…	K14559+K14550+K14572+K14572+K14550+K12845+K07936+K14557+K14563+K07936+K12845+K12619+K11129+K03685+K14573+K14571+K07936+K03538+K14554+K11131+K14546+K03115+K03115+K14567+K14552+K03115+K06943+K07936+K11130+K14539+K14539+K14571+K03097+K03115+K03115+K11128+K14566+K03264+K07936+K06943+K06943+K14572+K14538+K03537+K14570+K14569+K14564+K14550+K14568+K03115+K03097+K14545+K14525+K14525+K14567+K14569+K13288+…
Human Diseases	Infectious diseases	Herpes simplex infection	317	ko05168	Unigene000795;Unigene001324;Unigene001691;Unigene001722;Unigene002381;Unigene003509;Unigene003510;Unigene003533;Unigene003534;Unigene003850;Unigene006380;Unigene006566;Unigene006567;Unigene006790;Unigene006863;Unigene006957;Unigene008351;Unigene009518;Unigene009821;Unigene010348;Unigene010614;Unigene010615;Unigene010663;Unigene011448;Unigene011829;Unigene012258;Unigene013046;Unigene013552;Unigene…	K15409+K05411+K04519+K15414+K04440+K12881+K12881+K12881+K12881+K02206+K03130+K11220+K11220+K06531+K06269+K05132+K03347+K03134+K06269+K04404+K05130+K05130+K15413+K05410+K06752+K05654+K03006+K06752+K06751+K12890+K02580+K11674+K07293+K03875+K03115+K05130+K14966+K15129+K08738+K03115+K07210+K03006+K12892+K12892+K11219+K03097+K06269+K03115+K14216+K16195+K02207+K14216+K15413+K03131+K03094+K12891+K12893+…
Metabolism	Carbohydrate metabolism	Glycolysis / Gluconeogenesis	314	ko00010	Unigene000278;Unigene002245;Unigene003052;Unigene004036;Unigene006079;Unigene006200;Unigene006254;Unigene006331;Unigene006737;Unigene007293;Unigene007479;Unigene007566;Unigene007736;Unigene008303;Unigene009266;Unigene009773;Unigene010159;Unigene010655;Unigene010656;Unigene010837;Unigene011445;Unigene012130;Unigene012790;Unigene012847;Unigene012848;Unigene013071;Unigene016641;Unigene016705;Unigene…	K00927+K00850+K00627+K00844+K01803+K00844+K00129+K00134+K00121+K00382+K14085+K01623+K00161+K00927+K01689+K01785+K01689+K00162+K00162+K00873+K00873+K00844+K01835+K00121+K00121+K08074+K13951+K00128+K01623+K00850+K00844+K01623+K01835+K00128+K00134+K01835+K00002+K00128+K00927+K01689+K01689+K00627+K00627+K01792+K03103+K03103+K01623+K01623+K01623+K00016+K03841+K01803+K00134+K00128+K01623+K00134+K00134+…
Human Diseases	Cancers	Viral carcinogenesis	311	ko05203	Unigene001324;Unigene001422;Unigene001423;Unigene001634;Unigene002213;Unigene002965;Unigene002966;Unigene003146;Unigene003351;Unigene003406;Unigene003407;Unigene003470;Unigene003850;Unigene004504;Unigene004718;Unigene004980;Unigene005527;Unigene006080;Unigene007684;Unigene007690;Unigene008932;Unigene008933;Unigene008934;Unigene009023;Unigene009024;Unigene010185;Unigene010257;Unigene010663;Unigene…	K05411+K05060+K05060+K06067+K10610+K04469+K04469+K06624+K10691+K04364+K04364+K04345+K02206+K11643+K05768+K04345+K05699+K15041+K11254+K08053+K12076+K12076+K12076+K02833+K02833+K16175+K10691+K15413+K00873+K06067+K05699+K02146+K11254+K03141+K11254+K06626+K03123+K16197+K06751+K04450+K11254+K02580+K06638+K06053+K04392+K04392+K03875+K06067+K05704+K06063+K04374+K07210+K11254+K02089+K04371+K04371+K16332+…
Environmental Information Processing	Signal transduction	Rap1 signaling pathway	311	ko04015	Unigene000858;Unigene000859;Unigene001206;Unigene001207;Unigene001302;Unigene001499;Unigene002087;Unigene002509;Unigene003176;Unigene004083;Unigene004647;Unigene007191;Unigene008115;Unigene008206;Unigene008870;Unigene009023;Unigene009024;Unigene010073;Unigene010736;Unigene012686;Unigene013015;Unigene013016;Unigene013499;Unigene014406;Unigene015492;Unigene015493;Unigene016119;Unigene016120;Unigene…	K04438+K04438+K08020+K08020+K17698+K04361+K02677+K06277+K04441+K08043+K04680+K02183+K07860+K08046+K17698+K02833+K02833+K02677+K08732+K17698+K06070+K06070+K05692+K05858+K04392+K04392+K04634+K04634+K04634+K17703+K05704+K07362+K04441+K04441+K08043+K08043+K17698+K17698+K06070+K05461+K05461+K06093+K04371+K04371+K04456+K04366+K04366+K04630+K04456+K02677+K02183+K02183+K02183+K02183+K05759+K04369+K05692+…
Human Diseases	Infectious diseases	Tuberculosis	310	ko05152	Unigene001221;Unigene001465;Unigene001691;Unigene001952;Unigene002160;Unigene002381;Unigene002828;Unigene003176;Unigene004122;Unigene005363;Unigene006566;Unigene006567;Unigene006957;Unigene007191;Unigene007958;Unigene008163;Unigene009318;Unigene011374;Unigene011829;Unigene012231;Unigene012232;Unigene013300;Unigene013301;Unigene013552;Unigene013873;Unigene014088;Unigene014592;Unigene015389;Unigene…	K04733+K04733+K04519+K06472+K02155+K04440+K01368+K04441+K04733+K05398+K11220+K11220+K05132+K02183+K04733+K04733+K06268+K02146+K06752+K00914+K00914+K10048+K10048+K06752+K04733+K04077+K02580+K06856+K05704+K03662+K04733+K04515+K07887+K04441+K04441+K04733+K04730+K04730+K08738+K04733+K04733+K07532+K04371+K04371+K04733+K04456+K13375+K04366+K04366+K04456+K04730+K04730+K04730+K03661+K04733+K02183+K04733+…
Human Diseases	Cancers	MicroRNAs in cancer	304	ko05206	Unigene000858;Unigene000859;Unigene001499;Unigene002087;Unigene003146;Unigene003261;Unigene003406;Unigene003407;Unigene006581;Unigene006766;Unigene009023;Unigene009024;Unigene010073;Unigene010820;Unigene012089;Unigene012669;Unigene012675;Unigene013269;Unigene013538;Unigene013539;Unigene014592;Unigene014610;Unigene015951;Unigene016555;Unigene016556;Unigene016566;Unigene017009;Unigene017010;Unigene…	K04438+K04438+K04361+K02677+K06624+K04728+K04364+K04364+K11459+K05762+K02833+K02833+K02677+K07204+K06626+K17454+K09299+K08270+K04728+K04728+K02580+K10127+K12561+K10145+K10145+K00558+K05734+K05734+K01110+K10605+K13863+K04366+K04366+K04377+K02677+K17390+K09299+K06279+K04369+K08007+K16866+K07606+K04728+K11430+K07436+K05665+K17387+K10373+K08007+K02539+K16857+K06256+K04702+K06252+K05099+K12886+K12886+…
Metabolism	Amino acid metabolism	Lysine degradation	304	ko00310	Unigene000721;Unigene003316;Unigene003317;Unigene003643;Unigene004327;Unigene005179;Unigene005709;Unigene006768;Unigene006788;Unigene007479;Unigene007781;Unigene007856;Unigene008680;Unigene008773;Unigene011554;Unigene014533;Unigene015129;Unigene015544;Unigene016264;Unigene016705;Unigene017002;Unigene017003;Unigene017524;Unigene020519;Unigene020774;Unigene021474;Unigene022189;Unigene022190;Unigene…	K09187+K00306+K00306+K11420+K07511+K06101+K09186+K09187+K00164+K14085+K11433+K09187+K07511+K11420+K09186+K11433+K09186+K00022+K00626+K00128+K11424+K11424+K11420+K15588+K00128+K00128+K09188+K11422+K00471+K11703+K11423+K00128+K09189+K09189+K09189+K00471+K00471+K13646+K00128+K00825+K13645+K11433+K11703+K11433+K11433+K11422+K00825+K09186+K00626+K11419+K00626+K11433+K00471+K00022+K11420+K00471+K00825+…
Cellular Processes	Cell growth and death	Cell cycle	302	ko04110	Unigene000364;Unigene000578;Unigene000579;Unigene001401;Unigene001634;Unigene002991;Unigene003004;Unigene003045;Unigene003146;Unigene003261;Unigene003850;Unigene003927;Unigene006733;Unigene008351;Unigene009790;Unigene009791;Unigene010167;Unigene010982;Unigene012089;Unigene012135;Unigene012136;Unigene012669;Unigene013538;Unigene013539;Unigene013983;Unigene014477;Unigene014784;Unigene015656;Unigene…	K06633+K06639+K06639+K03868+K06067+K03359+K06629+K02607+K06624+K04728+K02206+K04500+K02180+K03347+K06628+K06628+K06635+K06067+K06626+K02605+K02605+K17454+K04728+K04728+K16197+K09392+K06638+K03353+K03875+K06067+K02542+K06671+K03350+K06637+K02089+K16332+K05868+K13375+K16198+K16198+K06630+K06630+K04683+K06669+K06669+K06669+K06630+K04500+K04377+K06067+K03083+K06636+K03348+K03094+K03083+K03352+K03352+…
Cellular Processes	Cell growth and death	Apoptosis	292	ko04210	Unigene001221;Unigene001465;Unigene001691;Unigene003261;Unigene003470;Unigene004122;Unigene004980;Unigene005310;Unigene005537;Unigene005538;Unigene005759;Unigene007958;Unigene008163;Unigene009318;Unigene009899;Unigene010262;Unigene012497;Unigene012956;Unigene013538;Unigene013539;Unigene013683;Unigene013873;Unigene014592;Unigene014960;Unigene016357;Unigene017273;Unigene017450;Unigene017451;Unigene…	K04733+K04733+K04519+K04728+K04345+K04733+K04345+K04739+K04722+K04722+K04730+K04733+K04733+K06268+K04730+K02861+K04724+K04722+K04728+K04728+K16060+K04733+K02580+K04739+K16060+K04733+K04730+K04733+K04733+K04730+K04730+K08738+K04733+K01173+K07210+K04733+K04733+K04733+K04456+K04456+K04730+K04730+K04730+K04733+K04348+K04733+K04733+K02159+K16060+K04570+K04728+K00922+K04733+K04733+K01367+K01367+K03158+…
Cellular Processes	Cell growth and death	Oocyte meiosis	283	ko04114	Unigene000022;Unigene000364;Unigene001401;Unigene002844;Unigene002991;Unigene003199;Unigene003470;Unigene003850;Unigene004083;Unigene004228;Unigene004467;Unigene004980;Unigene006863;Unigene007191;Unigene008206;Unigene008351;Unigene009318;Unigene009821;Unigene010167;Unigene012061;Unigene012089;Unigene013624;Unigene013983;Unigene015656;Unigene015861;Unigene016474;Unigene016551;Unigene017320;Unigene…	K02183+K06633+K03868+K11584+K03359+K05861+K04345+K02206+K08043+K02183+K08836+K04345+K06269+K02183+K08046+K03347+K06268+K06269+K06635+K04382+K06626+K08836+K16197+K03353+K02183+K03456+K11584+K04515+K04958+K03350+K08043+K08043+K11584+K02183+K08557+K04371+K04371+K05868+K11584+K11584+K04960+K16198+K16198+K06630+K06630+K04382+K06669+K06669+K06669+K10292+K06630+K06269+K02183+K04348+K02183+K02183+K02183+…
Human Diseases	Infectious diseases	Toxoplasmosis	283	ko05145	Unigene000786;Unigene000907;Unigene001221;Unigene001465;Unigene001517;Unigene002381;Unigene003176;Unigene004122;Unigene004516;Unigene006099;Unigene006100;Unigene006566;Unigene006567;Unigene006957;Unigene007378;Unigene007958;Unigene008163;Unigene009274;Unigene010348;Unigene011119;Unigene011829;Unigene012246;Unigene013552;Unigene013683;Unigene013873;Unigene014592;Unigene016357;Unigene016444;Unigene…	K06244+K03283+K04733+K04733+K03283+K04440+K04441+K04733+K03283+K06276+K06276+K11220+K11220+K05132+K06240+K04733+K04733+K06244+K04404+K03283+K06752+K06240+K06752+K16060+K04733+K02580+K16060+K05635+K04733+K04441+K04441+K04733+K04730+K04730+K08738+K04733+K13412+K07210+K04733+K04371+K04371+K11219+K06244+K04733+K04456+K13375+K04630+K04456+K04730+K04730+K04730+K04733+K04733+K04733+K16060+K04570+K09565+…
Organismal Systems	Nervous system	Neurotrophin signaling pathway	282	ko04722	Unigene000858;Unigene000859;Unigene001034;Unigene001221;Unigene001465;Unigene002381;Unigene002509;Unigene002628;Unigene003176;Unigene003406;Unigene003407;Unigene004061;Unigene004062;Unigene004122;Unigene006099;Unigene006100;Unigene007191;Unigene007958;Unigene008163;Unigene009023;Unigene009024;Unigene013873;Unigene014592;Unigene015072;Unigene015492;Unigene015493;Unigene016659;Unigene016660;Unigene…	K04438+K04438+K12464+K04733+K04733+K04440+K06277+K12460+K04441+K04364+K04364+K12465+K12465+K04733+K06276+K06276+K02183+K04733+K04733+K02833+K02833+K04733+K02580+K07293+K04392+K04392+K06068+K06068+K04733+K04515+K04441+K04441+K04374+K04733+K04730+K04730+K04733+K12462+K04733+K04371+K04371+K04733+K04456+K04366+K04366+K04443+K04456+K04730+K04730+K04730+K04733+K02183+K04733+K02183+K04733+K02159+K02183+…
Human Diseases	Neurodegenerative diseases	Huntington's disease	278	ko05016	Unigene000401;Unigene000817;Unigene001333;Unigene001634;Unigene003130;Unigene003310;Unigene003543;Unigene003544;Unigene004118;Unigene004573;Unigene004848;Unigene004849;Unigene004997;Unigene005301;Unigene006080;Unigene006301;Unigene007066;Unigene007412;Unigene007413;Unigene008107;Unigene008288;Unigene009103;Unigene009116;Unigene009310;Unigene009326;Unigene009740;Unigene010309;Unigene010541;Unigene…	K11827+K02133+K03012+K06067+K02128+K11829+K03939+K03939+K03953+K03937+K11830+K11830+K03943+K03955+K15041+K02266+K02132+K11351+K11351+K02267+K05625+K04564+K03956+K09222+K04645+K08530+K02273+K11824+K11824+K06067+K00415+K03007+K05858+K02135+K00413+K00411+K03965+K00418+K04634+K04634+K04634+K06067+K03013+K05625+K03942+K02132+K10408+K04684+K08738+K02134+K05863+K10408+K02270+K02265+K02137+K11826+K02136+…
Organismal Systems	Immune system	Toll-like receptor signaling pathway	278	ko04620	Unigene001221;Unigene001324;Unigene001465;Unigene001691;Unigene002381;Unigene003176;Unigene004122;Unigene005363;Unigene005759;Unigene006566;Unigene006567;Unigene007958;Unigene008163;Unigene009899;Unigene010262;Unigene010348;Unigene010614;Unigene010615;Unigene011448;Unigene013873;Unigene014592;Unigene015492;Unigene015493;Unigene017216;Unigene017273;Unigene017450;Unigene017451;Unigene017712;Unigene…	K04733+K05411+K04733+K04519+K04440+K04441+K04733+K05398+K04730+K11220+K11220+K04733+K04733+K04730+K02861+K04404+K05130+K05130+K05410+K04733+K02580+K04392+K04392+K05130+K04733+K04730+K04733+K04441+K04441+K04733+K04730+K04730+K04733+K07210+K04733+K04733+K04371+K04371+K04733+K04456+K05402+K05402+K05402+K04456+K04730+K04730+K04730+K04733+K04733+K04733+K04369+K05408+K00922+K04733+K04733+K05411+K05411+…
Human Diseases	Infectious diseases	Measles	271	ko05162	Unigene000907;Unigene001221;Unigene001324;Unigene001465;Unigene001517;Unigene001691;Unigene003146;Unigene003850;Unigene004122;Unigene004516;Unigene005537;Unigene005538;Unigene006566;Unigene006567;Unigene006957;Unigene007958;Unigene008163;Unigene010348;Unigene010614;Unigene010615;Unigene011119;Unigene011448;Unigene012089;Unigene012956;Unigene013873;Unigene014202;Unigene014203;Unigene014592;Unigene…	K03283+K04733+K05411+K04733+K03283+K04519+K06624+K02206+K04733+K03283+K04722+K04722+K11220+K11220+K05132+K04733+K04733+K04404+K05130+K05130+K03283+K05410+K06626+K04722+K04733+K05703+K05703+K02580+K06856+K05130+K04733+K04733+K04730+K04730+K04733+K11859+K03115+K04733+K02089+K11219+K04733+K04456+K03097+K04456+K03115+K04730+K04730+K04730+K14216+K04733+K04733+K04733+K10144+K16195+K14216+K14753+K03083+…
Environmental Information Processing	Signal transduction	Calcium signaling pathway	268	ko04020	Unigene000022;Unigene001064;Unigene001065;Unigene001066;Unigene001214;Unigene001215;Unigene001499;Unigene001544;Unigene001618;Unigene002087;Unigene003199;Unigene003470;Unigene004083;Unigene004228;Unigene004564;Unigene004980;Unigene005148;Unigene005969;Unigene005970;Unigene006080;Unigene007191;Unigene009318;Unigene010073;Unigene010704;Unigene010720;Unigene011482;Unigene014406;Unigene015251;Unigene…	K02183+K04855+K04855+K04855+K18196+K18196+K04361+K16057+K04166+K02677+K05861+K04345+K08043+K02183+K05850+K04345+K16056+K18196+K18196+K15041+K02183+K06268+K02677+K04635+K05850+K05871+K05858+K04166+K06856+K02183+K05850+K04634+K04634+K04634+K04515+K04958+K04849+K08043+K08043+K16059+K05863+K05850+K02183+K04960+K02677+K02183+K04348+K05853+K02183+K02183+K02183+K15040+K05850+K05850+K05862+K09565+K05857+…
Organismal Systems	Circulatory system	Adrenergic signaling in cardiomyocytes	266	ko04261	Unigene000022;Unigene001618;Unigene002844;Unigene003176;Unigene003470;Unigene004083;Unigene004228;Unigene004564;Unigene004980;Unigene005532;Unigene006863;Unigene007191;Unigene008206;Unigene009821;Unigene010720;Unigene011291;Unigene012061;Unigene014287;Unigene014406;Unigene015251;Unigene015861;Unigene015869;Unigene016119;Unigene016120;Unigene016121;Unigene016474;Unigene016519;Unigene016551;Unigene…	K02183+K04166+K11584+K04441+K04345+K08043+K02183+K05850+K04345+K04354+K06269+K02183+K08046+K06269+K05850+K12314+K04382+K04450+K05858+K04166+K02183+K05850+K04634+K04634+K04634+K03456+K12314+K11584+K09290+K04515+K01540+K04441+K04441+K04374+K08043+K08043+K01540+K05850+K11584+K02183+K04371+K04371+K11584+K11584+K04456+K04354+K04382+K06269+K04630+K04456+K02677+K10374+K10374+K02183+K05853+K02183+K02183+…
Organismal Systems	Endocrine system	Thyroid hormone signaling pathway	258	ko04919	Unigene001100;Unigene001634;Unigene002087;Unigene002554;Unigene003470;Unigene004182;Unigene004980;Unigene006099;Unigene006100;Unigene006566;Unigene006567;Unigene006686;Unigene006687;Unigene009023;Unigene009024;Unigene010073;Unigene010124;Unigene010982;Unigene011631;Unigene011632;Unigene012735;Unigene013499;Unigene013860;Unigene013861;Unigene014406;Unigene016135;Unigene016365;Unigene016559;Unigene…	K15164+K06067+K02677+K15164+K04345+K15167+K04345+K06276+K06276+K11220+K11220+K11256+K11256+K02833+K02833+K02677+K07299+K06067+K15144+K15144+K15133+K05692+K04650+K04650+K05858+K06067+K15164+K07207+K07207+K05704+K15164+K07208+K07208+K01540+K04650+K04371+K04371+K04456+K04366+K04366+K04377+K06067+K04456+K02677+K05853+K11256+K11256+K04650+K04369+K05692+K05692+K03083+K06487+K01539+K02105+K08268+K05692+…
Metabolism	Carbohydrate metabolism	Inositol phosphate metabolism	257	ko00562	Unigene000678;Unigene000938;Unigene001139;Unigene002238;Unigene003199;Unigene004907;Unigene006079;Unigene006787;Unigene009198;Unigene009199;Unigene009512;Unigene010136;Unigene010272;Unigene011019;Unigene012231;Unigene012232;Unigene014406;Unigene014756;Unigene016527;Unigene017297;Unigene017298;Unigene017710;Unigene017711;Unigene017944;Unigene018289;Unigene021175;Unigene021586;Unigene022565;Unigene…	K00889+K15909+K01858+K00920+K05861+K05858+K01803+K01099+K18082+K18082+K13711+K00923+K13711+K15909+K00914+K00914+K05858+K00913+K01092+K00888+K00888+K00140+K00140+K01110+K00923+K18081+K01858+K00889+K03103+K03103+K00920+K00888+K01803+K00922+K05857+K00915+K01858+K01858+K01858+K03103+K00888+K01110+K15759+K18082+K18082+K01099+K01106+K00140+K13711+K01803+K01107+K01099+K01099+K01099+K03103+K01110+K01803+…
Human Diseases	Neurodegenerative diseases	Alzheimer's disease	251	ko05010	Unigene000817;Unigene001434;Unigene001691;Unigene002922;Unigene003130;Unigene003543;Unigene003544;Unigene004118;Unigene004573;Unigene004997;Unigene005301;Unigene006301;Unigene007066;Unigene007191;Unigene007412;Unigene007413;Unigene008107;Unigene009116;Unigene009318;Unigene010309;Unigene011079;Unigene014406;Unigene015089;Unigene015295;Unigene015611;Unigene015889;Unigene015923;Unigene015962;Unigene…	K02133+K04520+K04519+K06059+K02128+K03939+K03939+K03953+K03937+K03943+K03955+K02266+K02132+K02183+K11351+K11351+K02267+K03956+K06268+K02273+K00415+K05858+K06704+K02135+K00413+K00411+K03965+K00418+K04634+K04634+K04634+K09054+K04550+K09054+K03942+K02132+K08738+K02134+K06171+K02270+K02265+K02137+K02136+K04371+K04371+K04960+K02263+K02268+K02183+K05853+K02183+K02138+K03948+K00236+K02183+K02183+K02128+…
Environmental Information Processing	Signal transduction	cGMP - PKG signaling pathway	250	ko04022	Unigene001618;Unigene002420;Unigene004083;Unigene004564;Unigene006080;Unigene006863;Unigene007191;Unigene007445;Unigene008206;Unigene009318;Unigene010704;Unigene010720;Unigene013615;Unigene014287;Unigene014406;Unigene015251;Unigene015869;Unigene016119;Unigene016120;Unigene016121;Unigene016209;Unigene017912;Unigene018352;Unigene018353;Unigene018802;Unigene019304;Unigene021233;Unigene021234;Unigene…	K04166+K13296+K08043+K05850+K15041+K06269+K02183+K09260+K08046+K06268+K04635+K05850+K06270+K04450+K05858+K04166+K05850+K04634+K04634+K04634+K09262+K04374+K08043+K08043+K01540+K05863+K04371+K04371+K18154+K18154+K04960+K04456+K04366+K04366+K04630+K17333+K17333+K17333+K04456+K02183+K05853+K02183+K02183+K02183+K15040+K05850+K04369+K05862+K09565+K06269+K05850+K04639+K05853+K01539+K02183+K02183+K04136+…
Metabolism	Carbohydrate metabolism	Amino sugar and nucleotide sugar metabolism	246	ko00520	Unigene000720;Unigene000802;Unigene000924;Unigene002674;Unigene002838;Unigene002962;Unigene002963;Unigene003833;Unigene004036;Unigene004263;Unigene004345;Unigene005850;Unigene006200;Unigene008414;Unigene009090;Unigene009284;Unigene010777;Unigene010786;Unigene010787;Unigene010815;Unigene011452;Unigene011999;Unigene012130;Unigene012365;Unigene012790;Unigene013698;Unigene013708;Unigene018388;Unigene…	K05304+K00326+K08678+K00820+K17497+K00963+K00963+K01183+K00844+K00966+K00963+K01183+K00844+K12409+K00820+K12373+K01784+K00849+K00849+K01711+K01183+K01183+K00844+K01183+K01835+K01784+K00326+K01711+K00844+K01835+K01835+K12373+K12373+K00963+K00963+K00963+K08678+K08678+K00326+K01784+K02564+K00326+K12450+K00012+K02377+K00884+K08678+K00966+K12373+K00966+K00621+K01810+K01784+K00844+K01711+K01183+K01784+…
Human Diseases	Cancers	Transcriptional misregulation in cancers	244	ko05202	Unigene000585;Unigene001243;Unigene001415;Unigene001634;Unigene002123;Unigene002124;Unigene002163;Unigene002526;Unigene003139;Unigene003146;Unigene003261;Unigene003782;Unigene003783;Unigene006281;Unigene006581;Unigene007926;Unigene008305;Unigene008493;Unigene008992;Unigene009740;Unigene010584;Unigene010673;Unigene010674;Unigene010982;Unigene013300;Unigene013301;Unigene013399;Unigene013538;Unigene…	K15592+K00717+K13209+K06067+K14242+K14242+K11449+K04388+K11449+K06624+K04728+K15188+K15188+K00069+K11459+K04376+K06571+K11447+K15620+K08530+K15188+K04453+K04453+K06067+K10048+K10048+K04452+K04728+K04728+K04650+K04650+K02580+K09186+K06856+K06067+K16060+K14242+K14242+K11424+K11424+K04684+K13098+K13105+K04650+K11253+K04377+K06067+K11253+K04650+K04570+K14651+K14651+K11253+K04728+K08527+K11253+K11253+…
Environmental Information Processing	Signal transduction	Ras signaling pathway	239	ko04014	Unigene001499;Unigene002087;Unigene002381;Unigene003406;Unigene003407;Unigene003430;Unigene003470;Unigene004980;Unigene006630;Unigene006973;Unigene006974;Unigene007191;Unigene007690;Unigene008115;Unigene009023;Unigene009024;Unigene010073;Unigene010736;Unigene011448;Unigene013771;Unigene014592;Unigene015072;Unigene015492;Unigene015493;Unigene016661;Unigene017009;Unigene017010;Unigene017608;Unigene…	K04361+K02677+K04440+K04364+K04364+K08052+K04345+K04345+K07941+K04411+K04411+K02183+K08053+K07860+K02833+K02833+K02677+K08732+K05410+K02678+K02580+K07293+K04392+K04392+K07362+K05734+K05734+K07887+K07210+K05461+K05461+K04371+K04371+K04456+K04366+K04366+K04456+K02677+K02183+K02183+K02183+K02183+K04570+K06279+K04537+K04369+K07830+K10785+K10785+K02183+K02183+K05099+K05465+K01115+K05733+K01115+K01115+…
Environmental Information Processing	Signal transduction	mTOR signaling pathway	236	ko04150	Unigene002087;Unigene003006;Unigene006099;Unigene006100;Unigene006996;Unigene006997;Unigene008455;Unigene008456;Unigene008754;Unigene009080;Unigene010073;Unigene010820;Unigene013269;Unigene014140;Unigene016559;Unigene016560;Unigene017944;Unigene018597;Unigene018598;Unigene019713;Unigene021186;Unigene021233;Unigene021234;Unigene021817;Unigene022639;Unigene022640;Unigene022931;Unigene023356;Unigene…	K02677+K03259+K06276+K06276+K07198+K07198+K07198+K07198+K03259+K03259+K02677+K07204+K08270+K07204+K07207+K07207+K01110+K07208+K07208+K08272+K16184+K04371+K04371+K04456+K04688+K04688+K02991+K08272+K04456+K02677+K02991+K02991+K07198+K07198+K08272+K04688+K04373+K07206+K07205+K04373+K04373+K00922+K02991+K07298+K02991+K03259+K08266+K08268+K03259+K01110+K04688+K04371+K03258+K03259+K08272+K08269+K06276+…
Metabolism	Lipid metabolism	Glycerophospholipid metabolism	236	ko00564	Unigene000506;Unigene000655;Unigene001906;Unigene003175;Unigene004169;Unigene004444;Unigene004604;Unigene004605;Unigene004815;Unigene007790;Unigene007814;Unigene009436;Unigene009689;Unigene009690;Unigene010299;Unigene010572;Unigene010850;Unigene010851;Unigene011321;Unigene011322;Unigene011676;Unigene011677;Unigene011992;Unigene011993;Unigene012611;Unigene012623;Unigene012624;Unigene013611;Unigene…	K06130+K06124+K13513+K08729+K13509+K00901+K15728+K15728+K00901+K01126+K16860+K06130+K13516+K13516+K13515+K00551+K08744+K08744+K00994+K00994+K18695+K18695+K00901+K00901+K13644+K00968+K00968+K00967+K13512+K01115+K13509+K13509+K13514+K00649+K01080+K00629+K00629+K00968+K00981+K08730+K13506+K14156+K00894+K14156+K00967+K06130+K00894+K13523+K00006+K13514+K00993+K14286+K00901+K01047+K01047+K13517+K01080+…
Cellular Processes	Cellular commiunity	Tight junction	234	ko04530	Unigene002087;Unigene005179;Unigene005527;Unigene005528;Unigene005532;Unigene005837;Unigene008297;Unigene009023;Unigene009024;Unigene010059;Unigene010073;Unigene011162;Unigene012061;Unigene013499;Unigene014634;Unigene015057;Unigene016474;Unigene016607;Unigene016659;Unigene016660;Unigene017007;Unigene017944;Unigene018603;Unigene018832;Unigene018833;Unigene019137;Unigene019138;Unigene020255;Unigene…	K02677+K06101+K05699+K05699+K04354+K06100+K04393+K02833+K02833+K06110+K02677+K05699+K04382+K05692+K06100+K05701+K03456+K05704+K06068+K06068+K03115+K01110+K03115+K05692+K05692+K06103+K06103+K06093+K02089+K06087+K04456+K06107+K06107+K04354+K04382+K03097+K04630+K04456+K02677+K03115+K06110+K05691+K06106+K06106+K05692+K05692+K07830+K05699+K04237+K06107+K05699+K05699+K05692+K10352+K02105+K06096+K06096+…
Human Diseases	Infectious diseases	Hepatitis B	230	ko05161	Unigene001324;Unigene002087;Unigene002213;Unigene002381;Unigene003146;Unigene003406;Unigene003407;Unigene003850;Unigene006080;Unigene006566;Unigene006567;Unigene009023;Unigene009024;Unigene010073;Unigene010614;Unigene010615;Unigene011448;Unigene011482;Unigene012089;Unigene012669;Unigene013983;Unigene014287;Unigene014592;Unigene016607;Unigene016849;Unigene017216;Unigene017912;Unigene017944;Unigene…	K05411+K02677+K10610+K04440+K06624+K04364+K04364+K02206+K15041+K11220+K11220+K02833+K02833+K02677+K05130+K05130+K05410+K05871+K06626+K17454+K16197+K04450+K02580+K05704+K03662+K05130+K04374+K01110+K08738+K07210+K02089+K04371+K04371+K04456+K13375+K08731+K04366+K04366+K04377+K17333+K17333+K17333+K04456+K02677+K02159+K04369+K11217+K16197+K16197+K05411+K05411+K08738+K11594+K11594+K04734+K04734+K16197+…
Organismal Systems	Endocrine system	Oxytocin signaling pathway	226	ko04921	Unigene001499;Unigene002087;Unigene003470;Unigene003503;Unigene004083;Unigene004980;Unigene005028;Unigene006863;Unigene007191;Unigene008206;Unigene009023;Unigene009024;Unigene009318;Unigene010073;Unigene013499;Unigene013615;Unigene014406;Unigene016119;Unigene016120;Unigene016121;Unigene016607;Unigene017320;Unigene018352;Unigene018353;Unigene021233;Unigene021234;Unigene021470;Unigene021471;Unigene…	K04361+K02677+K04345+K07199+K08043+K04345+K12329+K06269+K02183+K08046+K02833+K02833+K06268+K02677+K05692+K06270+K05858+K04634+K04634+K04634+K05704+K04515+K08043+K08043+K04371+K04371+K18154+K18154+K04960+K04366+K04366+K04630+K17333+K17333+K17333+K02677+K02183+K02183+K02183+K02183+K04369+K05692+K05692+K03234+K06269+K12751+K12751+K07200+K02183+K02183+K04632+K05692+K05692+K05692+K05692+K03234+K05692+…
Environmental Information Processing	Signal transduction	cAMP signaling pathway	220	ko04024	Unigene002381;Unigene002420;Unigene003470;Unigene004083;Unigene004564;Unigene004980;Unigene005148;Unigene006863;Unigene007191;Unigene008115;Unigene008206;Unigene010720;Unigene013615;Unigene013874;Unigene014592;Unigene015492;Unigene015493;Unigene015869;Unigene017320;Unigene018352;Unigene018353;Unigene018802;Unigene021233;Unigene021234;Unigene021817;Unigene022602;Unigene022603;Unigene023086;Unigene…	K04440+K13296+K04345+K08043+K05850+K04345+K16056+K06269+K02183+K07860+K08046+K05850+K06270+K05730+K02580+K04392+K04392+K05850+K04515+K08043+K08043+K01540+K04371+K04371+K04456+K04366+K04366+K04630+K04456+K02183+K05853+K02183+K02183+K02183+K05850+K04369+K07830+K06269+K05850+K01539+K02183+K02183+K04632+K04734+K04734+K01115+K01115+K01115+K17388+K05702+K08046+K16056+K08047+K08047+K02183+K05850+K05850+…
Genetic Information Processing	Folding, sorting and degradation	Proteasome	219	ko03050	Unigene000807;Unigene001112;Unigene001203;Unigene002006;Unigene002189;Unigene002290;Unigene002364;Unigene002365;Unigene002626;Unigene003151;Unigene003152;Unigene003337;Unigene008241;Unigene008532;Unigene008674;Unigene008675;Unigene008853;Unigene008854;Unigene009044;Unigene009091;Unigene009635;Unigene010053;Unigene010998;Unigene013621;Unigene014742;Unigene015086;Unigene015314;Unigene015890;Unigene…	K06696+K03061+K02737+K02737+K02735+K02739+K02725+K02725+K03032+K03064+K03064+K03028+K03036+K03028+K03062+K03062+K02733+K02733+K03030+K03039+K03035+K03062+K02732+K03062+K03036+K03029+K03039+K03065+K03064+K03064+K03063+K02726+K02727+K02727+K02738+K02738+K02731+K03033+K03037+K02737+K03065+K02732+K03038+K03038+K02728+K03035+K02739+K03063+K02732+K02731+K06700+K02731+K02735+K06698+K02725+K02726+K02726+…
Environmental Information Processing	Signal transduction	NF-kappa B signaling pathway	218	ko04064	Unigene001221;Unigene001465;Unigene001691;Unigene002965;Unigene002966;Unigene003261;Unigene004122;Unigene007786;Unigene007958;Unigene008163;Unigene010060;Unigene010061;Unigene010262;Unigene010348;Unigene012497;Unigene013538;Unigene013539;Unigene013683;Unigene013873;Unigene014592;Unigene015389;Unigene016357;Unigene016661;Unigene017273;Unigene018043;Unigene018090;Unigene018091;Unigene018262;Unigene…	K04733+K04733+K04519+K04469+K04469+K04728+K04733+K10798+K04733+K04733+K12793+K12793+K02861+K04404+K04724+K04728+K04728+K16060+K04733+K02580+K06856+K16060+K07362+K04733+K04733+K04730+K04730+K10652+K04733+K11859+K03115+K07210+K04733+K04733+K03097+K03115+K04730+K04730+K04730+K04733+K04733+K04733+K16060+K04570+K03159+K10130+K04728+K05854+K04733+K04733+K03158+K06856+K11859+K11859+K11859+K10785+K10785+…
Genetic Information Processing	Translation	Aminoacyl-tRNA biosynthesis	217	ko00970	Unigene000431;Unigene002416;Unigene003602;Unigene003603;Unigene003855;Unigene005082;Unigene007193;Unigene009099;Unigene009615;Unigene009778;Unigene012914;Unigene017942;Unigene018711;Unigene020059;Unigene022571;Unigene022782;Unigene026340;Unigene026341;Unigene027310;Unigene027679;Unigene030298;Unigene031225;Unigene031226;Unigene032162;Unigene044672;Unigene045174;Unigene047804;Unigene047917;Unigene…	K01892+K01887+K01876+K01876+K01873+K04567+K01890+K01883+K01874+K01889+K01873+K01880+K01868+K02433+K01883+K01867+K01870+K01870+K01873+K01887+K01893+K01880+K01880+K14163+K01876+K01872+K01868+K14163+K01889+K01889+K02435+K01881+K01867+K01885+K01867+K01887+K00604+K00604+K01892+K01887+K01889+K01886+K01875+K01875+K02433+K01870+K01890+K01890+K14163+K01883+K01866+K02434+K01875+K03341+K03341+K01872+K01872+…
Environmental Information Processing	Signal transduction	Hippo signaling pathway	214	ko04390	Unigene001895;Unigene002526;Unigene003120;Unigene003974;Unigene004647;Unigene005023;Unigene005532;Unigene006863;Unigene007012;Unigene008696;Unigene008932;Unigene008933;Unigene008934;Unigene010185;Unigene012515;Unigene013057;Unigene013058;Unigene013102;Unigene013499;Unigene013983;Unigene014454;Unigene015657;Unigene016140;Unigene016506;Unigene019315;Unigene020255;Unigene021627;Unigene021843;Unigene…	K02353+K04388+K02620+K09448+K04680+K12075+K04354+K06269+K09448+K04412+K12076+K12076+K12076+K16175+K02353+K08960+K08960+K02157+K05692+K16197+K06685+K02620+K02235+K04492+K08959+K06093+K02157+K13375+K16198+K04354+K08731+K04382+K04500+K04377+K08960+K05691+K05692+K05692+K16687+K03083+K09448+K09448+K16197+K16197+K04492+K04492+K06269+K04237+K02105+K03982+K05692+K16197+K05692+K05692+K05692+K05692+K05692+…
Human Diseases	Infectious diseases	Chagas disease (American trypanosomiasis)	213	ko05142	Unigene001221;Unigene001465;Unigene001691;Unigene002381;Unigene002526;Unigene003176;Unigene004122;Unigene005532;Unigene006957;Unigene007958;Unigene008163;Unigene010704;Unigene012497;Unigene013873;Unigene014406;Unigene014592;Unigene016119;Unigene016120;Unigene016121;Unigene017273;Unigene017712;Unigene017713;Unigene018043;Unigene018090;Unigene018091;Unigene018447;Unigene019038;Unigene019520;Unigene…	K04733+K04733+K04519+K04440+K04388+K04441+K04733+K04354+K05132+K04733+K04733+K04635+K04724+K04733+K05858+K02580+K04634+K04634+K04634+K04733+K04441+K04441+K04733+K04730+K04730+K04733+K07210+K04733+K04371+K04371+K04733+K04456+K13375+K04354+K04382+K04500+K04630+K08057+K04456+K04730+K04730+K04730+K04733+K04733+K04733+K05408+K04733+K04733+K03158+K03982+K10785+K10785+K04733+K04632+K04734+K04734+K04637+…
Organismal Systems	Immune system	Chemokine signaling pathway	212	ko04062	Unigene000858;Unigene000859;Unigene003406;Unigene003407;Unigene003470;Unigene003946;Unigene003947;Unigene004083;Unigene004980;Unigene006566;Unigene006567;Unigene008115;Unigene008206;Unigene009023;Unigene009024;Unigene011482;Unigene013874;Unigene014406;Unigene014592;Unigene015492;Unigene015493;Unigene016607;Unigene017392;Unigene017726;Unigene018352;Unigene018353;Unigene019038;Unigene021233;Unigene…	K04438+K04438+K04364+K04364+K04345+K08891+K08891+K08043+K04345+K11220+K11220+K07860+K08046+K02833+K02833+K05871+K05730+K05858+K02580+K04392+K04392+K05704+K12367+K10029+K08043+K08043+K07210+K04371+K04371+K04456+K04366+K04366+K04630+K04456+K05760+K06279+K04537+K03083+K05408+K05760+K05760+K05725+K09408+K05854+K04237+K04734+K04734+K08891+K17388+K08046+K05871+K08047+K08891+K07363+K08047+K11224+K02581+…
Metabolism	Carbohydrate metabolism	Pyruvate metabolism	211	ko00620	Unigene000989;Unigene001447;Unigene003052;Unigene005001;Unigene005646;Unigene006604;Unigene007293;Unigene007479;Unigene007736;Unigene008588;Unigene008748;Unigene010655;Unigene010656;Unigene010837;Unigene011445;Unigene015614;Unigene015860;Unigene016047;Unigene016168;Unigene016264;Unigene016574;Unigene016705;Unigene019391;Unigene019759;Unigene019760;Unigene020774;Unigene021474;Unigene022899;Unigene…	K00029+K11262+K00627+K01759+K00029+K00026+K00382+K14085+K00161+K00029+K00026+K00162+K00162+K00873+K00873+K00026+K11262+K00027+K00026+K00626+K00026+K00128+K01512+K01512+K01512+K00128+K00128+K00049+K01759+K00627+K00627+K00026+K00016+K00128+K00026+K00025+K00025+K00025+K00873+K01596+K00026+K00029+K00128+K13997+K13997+K00026+K00161+K01895+K00382+K00626+K00029+K00626+K00627+K01759+K00128+K11262+K00162+…
Environmental Information Processing	Signal transduction	TGF-beta signaling pathway	210	ko04350	Unigene001401;Unigene001701;Unigene002526;Unigene002886;Unigene003927;Unigene004497;Unigene004647;Unigene006536;Unigene008351;Unigene010834;Unigene012061;Unigene015714;Unigene016055;Unigene016056;Unigene016474;Unigene018180;Unigene021233;Unigene021234;Unigene021437;Unigene021843;Unigene022234;Unigene022405;Unigene022550;Unigene022562;Unigene022639;Unigene022640;Unigene022728;Unigene022902;Unigene…	K03868+K04675+K04388+K19559+K04500+K04679+K04680+K03868+K03347+K10162+K04382+K04382+K03868+K03868+K03456+K04684+K04371+K04371+K04498+K13375+K19383+K04683+K04382+K17696+K04688+K04688+K04500+K04377+K04382+K04382+K04688+K19559+K03094+K03094+K03094+K17694+K04685+K04678+K03094+K03094+K04382+K04681+K16857+K04671+K03094+K04677+K04674+K04688+K04371+K13578+K03456+K03094+K04500+K04682+K03347+K17696+K10162+…
Cellular Processes	Cellular commiunity	Adherens junction	210	ko04520	Unigene000029;Unigene001294;Unigene001499;Unigene002526;Unigene003120;Unigene003927;Unigene004031;Unigene004032;Unigene005527;Unigene005528;Unigene006790;Unigene008115;Unigene008297;Unigene009335;Unigene010163;Unigene010701;Unigene011162;Unigene013499;Unigene014202;Unigene014203;Unigene015057;Unigene015492;Unigene015493;Unigene015657;Unigene016506;Unigene016607;Unigene016656;Unigene017007;Unigene…	K05695+K05700+K04361+K04388+K02620+K04500+K04468+K04468+K05699+K05699+K06531+K07860+K04393+K05698+K05627+K05747+K05699+K05692+K05703+K05703+K05701+K04392+K04392+K02620+K04492+K05704+K05700+K03115+K05627+K03115+K05692+K05692+K05747+K04371+K04371+K04500+K03097+K05695+K03115+K05691+K05692+K05692+K05699+K04492+K04492+K04237+K05690+K05699+K05699+K05692+K16848+K16848+K02105+K05692+K04500+K05692+K05099+…
Metabolism	Carbohydrate metabolism	Starch and sucrose metabolism	209	ko00500	Unigene000924;Unigene002962;Unigene002963;Unigene004036;Unigene004345;Unigene004776;Unigene006200;Unigene008386;Unigene008628;Unigene011453;Unigene012130;Unigene012790;Unigene017494;Unigene017765;Unigene019203;Unigene019398;Unigene019490;Unigene020219;Unigene021291;Unigene021292;Unigene021421;Unigene021527;Unigene023099;Unigene023889;Unigene024125;Unigene025026;Unigene026301;Unigene027121;Unigene…	K08678+K00963+K00963+K00844+K00963+K16055+K00844+K01087+K16055+K12316+K00844+K01835+K00699+K00699+K00699+K00844+K00699+K01835+K00699+K00699+K01835+K00699+K00699+K00699+K00699+K01195+K00963+K00963+K01194+K00963+K08678+K08678+K00699+K00699+K01176+K01176+K00699+K00699+K00699+K00699+K00012+K00688+K08678+K00699+K01194+K01810+K01513+K00699+K12047+K01176+K00699+K00844+K00963+K01194+K01194+K00844+K00699+…
Environmental Information Processing	Signal transduction	AMPK signaling pathway	207	ko04152	Unigene002245;Unigene002844;Unigene003503;Unigene003853;Unigene005532;Unigene005576;Unigene006099;Unigene006100;Unigene009618;Unigene009740;Unigene010820;Unigene015316;Unigene015317;Unigene015860;Unigene016515;Unigene016559;Unigene016560;Unigene018597;Unigene018598;Unigene019713;Unigene020000;Unigene021186;Unigene021615;Unigene021616;Unigene021817;Unigene022217;Unigene022550;Unigene022943;Unigene…	K00850+K11584+K07199+K07297+K04354+K07905+K06276+K06276+K18341+K08530+K07204+K16333+K16333+K11262+K08765+K07207+K07207+K07208+K07208+K08272+K11584+K16184+K11584+K11584+K04456+K04354+K04382+K13088+K04456+K07197+K09408+K03234+K00850+K07200+K00665+K00507+K03234+K04688+K00850+K07203+K07197+K16184+K03841+K07203+K07903+K00665+K07203+K07359+K02649+K07200+K04503+K11584+K03456+K11262+K11262+K05087+K08271+…
Human Diseases	Endocrine and metabolic diseases	Non-alcoholic fatty liver disease (NAFLD)	204	ko04932	Unigene001691;Unigene002381;Unigene003503;Unigene003543;Unigene003544;Unigene003853;Unigene004118;Unigene004573;Unigene004997;Unigene005301;Unigene006301;Unigene007412;Unigene007413;Unigene008011;Unigene008107;Unigene009116;Unigene009490;Unigene009491;Unigene010309;Unigene011079;Unigene013399;Unigene014252;Unigene014481;Unigene014592;Unigene015492;Unigene015493;Unigene015611;Unigene015889;Unigene…	K04519+K04440+K07199+K03939+K03939+K07297+K03953+K03937+K03943+K03955+K02266+K11351+K11351+K09113+K02267+K03956+K04419+K04419+K02273+K00415+K04452+K09027+K09113+K02580+K04392+K04392+K00413+K00411+K03965+K00418+K03942+K04374+K08738+K02270+K02265+K04456+K13375+K02263+K02268+K04456+K07197+K05632+K03948+K02159+K00236+K03083+K03952+K02272+K03158+K08738+K07200+K03968+K00234+K08738+K08738+K02262+K07197+…
Organismal Systems	Circulatory system	Vascular smooth muscle contraction	202	ko04270	Unigene000022;Unigene001618;Unigene002087;Unigene003470;Unigene004083;Unigene004228;Unigene004980;Unigene005028;Unigene006863;Unigene007191;Unigene008206;Unigene009821;Unigene010073;Unigene010704;Unigene013615;Unigene014406;Unigene015251;Unigene015861;Unigene016119;Unigene016120;Unigene016121;Unigene016659;Unigene016660;Unigene017349;Unigene018352;Unigene018353;Unigene021102;Unigene021160;Unigene…	K02183+K04166+K02677+K04345+K08043+K02183+K04345+K12329+K06269+K02183+K08046+K06269+K02677+K04635+K06270+K05858+K04166+K02183+K04634+K04634+K04634+K06068+K06068+K04958+K08043+K08043+K02183+K07532+K04371+K04371+K04960+K04366+K04366+K06269+K02677+K02183+K02183+K02183+K02183+K04369+K06269+K04639+K04346+K12751+K12751+K02183+K02183+K02183+K02183+K02183+K02183+K02183+K04136+K04632+K01047+K01047+K02183+…
Cellular Processes	Cellular commiunity	Gap junction	200	ko04540	Unigene001499;Unigene002087;Unigene003406;Unigene003407;Unigene003470;Unigene004083;Unigene004224;Unigene004980;Unigene005185;Unigene006975;Unigene008206;Unigene008884;Unigene009023;Unigene009024;Unigene009145;Unigene009762;Unigene010073;Unigene010200;Unigene010704;Unigene014372;Unigene014406;Unigene015057;Unigene016119;Unigene016120;Unigene016121;Unigene016607;Unigene017349;Unigene018352;Unigene…	K04361+K02677+K04364+K04364+K04345+K08043+K07375+K04345+K07375+K07375+K08046+K07374+K02833+K02833+K07375+K07374+K02677+K07374+K04635+K07375+K05858+K05701+K04634+K04634+K04634+K05704+K04958+K08043+K08043+K08959+K07374+K04371+K04371+K04960+K04366+K04366+K04630+K07375+K02677+K07375+K04369+K07374+K07374+K07375+K07375+K07375+K07375+K07375+K07375+K07375+K07374+K07374+K07374+K07374+K07374+K04464+K04632+…
Organismal Systems	Endocrine system	GnRH signaling pathway	198	ko04912	Unigene000022;Unigene001499;Unigene002381;Unigene003176;Unigene003406;Unigene003407;Unigene003470;Unigene004083;Unigene004228;Unigene004980;Unigene007191;Unigene008206;Unigene008297;Unigene009023;Unigene009024;Unigene010704;Unigene011482;Unigene014406;Unigene015861;Unigene016119;Unigene016120;Unigene016121;Unigene016607;Unigene017320;Unigene017349;Unigene017712;Unigene017713;Unigene017912;Unigene…	K02183+K04361+K04440+K04441+K04364+K04364+K04345+K08043+K02183+K04345+K02183+K08046+K04393+K02833+K02833+K04635+K05871+K05858+K02183+K04634+K04634+K04634+K05704+K04515+K04958+K04441+K04441+K04374+K08043+K08043+K02183+K04371+K04371+K04960+K04366+K04366+K02677+K02183+K02183+K02183+K02183+K04369+K02183+K02183+K02183+K02183+K02183+K04464+K02183+K02183+K04632+K02183+K04428+K01115+K01115+K01115+K04375+…
Environmental Information Processing	Signaling molecules and interaction	ECM-receptor interaction	196	ko04512	Unigene000786;Unigene001793;Unigene007378;Unigene007622;Unigene009274;Unigene009644;Unigene012246;Unigene012414;Unigene012415;Unigene013275;Unigene016409;Unigene016444;Unigene016533;Unigene017388;Unigene021369;Unigene021434;Unigene022261;Unigene026253;Unigene026354;Unigene029513;Unigene029538;Unigene029864;Unigene030421;Unigene030663;Unigene032105;Unigene037185;Unigene037860;Unigene038437;Unigene…	K06244+K06254+K06240+K16338+K06244+K06238+K06240+K06483+K06483+K05637+K06254+K05635+K06254+K06237+K06244+K06237+K06236+K06525+K06257+K06588+K06265+K05636+K06236+K06487+K06482+K06250+K06237+K05719+K06236+K06237+K06237+K06266+K06266+K06485+K04659+K16857+K05717+K03900+K06256+K06238+K06237+K06249+K06238+K05719+K06238+K05636+K06252+K06249+K06240+K05719+K05636+K06258+K06236+K06237+K06237+K05719+K04659+…
Organismal Systems	Immune system	Platelet activation	192	ko04611	Unigene001952;Unigene003176;Unigene003470;Unigene004083;Unigene004980;Unigene005148;Unigene005529;Unigene006863;Unigene007505;Unigene008206;Unigene013499;Unigene013615;Unigene014202;Unigene014203;Unigene014406;Unigene016119;Unigene016120;Unigene016121;Unigene016607;Unigene017712;Unigene017713;Unigene018352;Unigene018353;Unigene018477;Unigene021160;Unigene021233;Unigene021234;Unigene021802;Unigene…	K06472+K04441+K04345+K08043+K04345+K16056+K08512+K06269+K17084+K08046+K05692+K06270+K05703+K05703+K05858+K04634+K04634+K04634+K05704+K04441+K04441+K08043+K08043+K16059+K07532+K04371+K04371+K04960+K04456+K04630+K04456+K05692+K05692+K06236+K05854+K06269+K06271+K04639+K05719+K12757+K04632+K05692+K05692+K05692+K05692+K05692+K05692+K05692+K05692+K05692+K17388+K08046+K16056+K08047+K04960+K08047+K06069+…
Human Diseases	Infectious diseases	Hepatitis C	188	ko05160	Unigene001324;Unigene001499;Unigene002381;Unigene003176;Unigene003406;Unigene003407;Unigene005532;Unigene006099;Unigene006100;Unigene006566;Unigene006567;Unigene009023;Unigene009024;Unigene010262;Unigene010614;Unigene010615;Unigene011448;Unigene014592;Unigene017216;Unigene017712;Unigene017713;Unigene019038;Unigene021233;Unigene021234;Unigene021357;Unigene021601;Unigene021817;Unigene022217;Unigene…	K05411+K04361+K04440+K04441+K04364+K04364+K04354+K06276+K06276+K11220+K11220+K02833+K02833+K02861+K05130+K05130+K05410+K02580+K05130+K04441+K04441+K07210+K04371+K04371+K11219+K06087+K04456+K04354+K04382+K04366+K04366+K04456+K14216+K16195+K14216+K03083+K11217+K12473+K06698+K05411+K05411+K03158+K16194+K04734+K04734+K13885+K16194+K12473+K08845+K04706+K14216+K08524+K11219+K04692+K14216+K12648+K04451+…
Organismal Systems	Endocrine system	Estrogen signaling pathway	188	ko04915	Unigene000888;Unigene000889;Unigene000907;Unigene001499;Unigene001517;Unigene003406;Unigene003407;Unigene003470;Unigene004083;Unigene004516;Unigene004980;Unigene007191;Unigene008206;Unigene009023;Unigene009024;Unigene011119;Unigene014287;Unigene014406;Unigene016097;Unigene016119;Unigene016120;Unigene016121;Unigene016607;Unigene016659;Unigene016660;Unigene017912;Unigene018180;Unigene018352;Unigene…	K09571+K09571+K03283+K04361+K03283+K04364+K04364+K04345+K08043+K03283+K04345+K02183+K08046+K02833+K02833+K03283+K04450+K05858+K09571+K04634+K04634+K04634+K05704+K06068+K06068+K04374+K04684+K08043+K08043+K04371+K04371+K04960+K04456+K04366+K04366+K04630+K04456+K02183+K09571+K02183+K02183+K02183+K06279+K04369+K04079+K04079+K04079+K09487+K04079+K03283+K03283+K03283+K02183+K02183+K04632+K03283+K03283+…
Metabolism	Carbohydrate metabolism	Citrate cycle (TCA cycle)	186	ko00020	Unigene003052;Unigene003894;Unigene003895;Unigene005584;Unigene006604;Unigene006788;Unigene007293;Unigene007736;Unigene008748;Unigene010312;Unigene010655;Unigene010656;Unigene012734;Unigene012776;Unigene015614;Unigene016168;Unigene016574;Unigene021461;Unigene024072;Unigene024073;Unigene024224;Unigene024385;Unigene024874;Unigene025848;Unigene026810;Unigene027332;Unigene027333;Unigene027592;Unigene…	K00627+K00031+K00031+K01899+K00026+K00164+K00382+K00161+K00026+K00030+K00162+K00162+K01648+K01681+K00026+K00026+K00026+K01647+K00627+K00627+K00026+K01648+K01647+K01648+K00236+K01648+K01648+K00030+K00026+K00025+K00025+K00025+K01900+K01900+K01596+K00026+K13997+K13997+K00026+K00235+K00161+K00030+K00382+K00030+K00627+K00237+K00234+K01647+K01899+K00030+K00236+K01900+K00234+K01648+K00658+K00162+K01681+…
Metabolism	Lipid metabolism	Glycerolipid metabolism	185	ko00561	Unigene000508;Unigene001906;Unigene004169;Unigene004444;Unigene004604;Unigene004605;Unigene004815;Unigene005942;Unigene006272;Unigene006273;Unigene007159;Unigene007160;Unigene007479;Unigene011992;Unigene011993;Unigene015918;Unigene015919;Unigene016377;Unigene016655;Unigene016705;Unigene020638;Unigene020774;Unigene021007;Unigene021449;Unigene021474;Unigene023022;Unigene025917;Unigene028462;Unigene…	K00863+K13513+K13509+K00901+K15728+K15728+K00901+K11155+K00864+K00864+K15788+K15788+K14085+K00901+K00901+K00011+K00011+K13509+K13509+K00128+K01080+K00128+K16816+K00002+K00128+K07407+K00011+K00629+K00629+K00128+K01189+K01189+K09881+K00128+K13506+K00011+K00011+K00011+K13523+K00901+K13517+K01080+K00011+K00011+K01054+K00011+K14075+K01080+K00901+K00901+K15728+K11155+K13506+K13506+K00864+K01054+K00128+…
Organismal Systems	Endocrine system	Melanogenesis	184	ko04916	Unigene000022;Unigene001895;Unigene002087;Unigene003120;Unigene003470;Unigene004083;Unigene004228;Unigene004980;Unigene007191;Unigene008206;Unigene009023;Unigene009024;Unigene010073;Unigene012515;Unigene014406;Unigene015657;Unigene015861;Unigene016119;Unigene016120;Unigene016121;Unigene016140;Unigene016506;Unigene017320;Unigene018352;Unigene018353;Unigene020206;Unigene020207;Unigene021102;Unigene…	K02183+K02353+K02677+K02620+K04345+K08043+K02183+K04345+K02183+K08046+K02833+K02833+K02677+K02353+K05858+K02620+K02183+K04634+K04634+K04634+K02235+K04492+K04515+K08043+K08043+K05461+K05461+K02183+K04371+K04371+K04366+K04366+K04630+K02677+K03083+K02183+K02183+K02183+K02183+K04369+K03083+K04492+K04492+K02105+K02183+K02183+K02183+K02183+K02183+K02183+K02183+K04632+K02183+K02375+K00444+K08046+K08047+…
Cellular Processes	Cellular commiunity	Signaling pathways regulating pluripotency of stem cells	183	ko04550	Unigene001422;Unigene001423;Unigene001895;Unigene003176;Unigene003406;Unigene003407;Unigene004647;Unigene006581;Unigene009023;Unigene009024;Unigene009310;Unigene010994;Unigene012515;Unigene012719;Unigene012720;Unigene013102;Unigene016140;Unigene016873;Unigene017712;Unigene017713;Unigene021233;Unigene021234;Unigene021627;Unigene021817;Unigene022602;Unigene022603;Unigene022728;Unigene022902;Unigene…	K05060+K05060+K02353+K04441+K04364+K04364+K04680+K11459+K02833+K02833+K09222+K11138+K02353+K11489+K11489+K02157+K02235+K11138+K04441+K04441+K04371+K04371+K02157+K04456+K04366+K04366+K04500+K04377+K04456+K18499+K04369+K03083+K11217+K17694+K09063+K02105+K11459+K09222+K00444+K17846+K04662+K11488+K02353+K11305+K02375+K11305+K08036+K11460+K09222+K11487+K04675+K04692+K11421+K11138+K02157+K11305+K09378+…
Environmental Information Processing	Signal transduction	ErbB signaling pathway	183	ko04012	Unigene000858;Unigene000859;Unigene001499;Unigene002087;Unigene002381;Unigene003406;Unigene003407;Unigene006960;Unigene009023;Unigene009024;Unigene009873;Unigene010073;Unigene012536;Unigene015461;Unigene015462;Unigene016607;Unigene017009;Unigene017010;Unigene017320;Unigene021233;Unigene021234;Unigene021817;Unigene022602;Unigene022603;Unigene022639;Unigene022640;Unigene022902;Unigene023220;Unigene…	K04438+K04438+K04361+K02677+K04440+K04364+K04364+K04368+K02833+K02833+K05733+K02677+K04431+K07365+K07365+K05704+K05734+K05734+K04515+K04371+K04371+K04456+K04366+K04366+K04688+K04688+K04377+K04707+K04456+K02677+K03083+K04688+K06279+K04369+K05456+K03083+K00922+K05725+K05735+K05733+K04688+K07203+K04375+K08845+K07365+K11224+K04431+K06619+K07203+K05084+K05084+K05704+K07203+K05734+K03083+K02649+K05725+…
Genetic Information Processing	Replication and repair	Fanconi anemia pathway	183	ko03460	Unigene000390;Unigene001504;Unigene001505;Unigene002754;Unigene003941;Unigene008429;Unigene009032;Unigene009345;Unigene009386;Unigene009387;Unigene010202;Unigene010504;Unigene015161;Unigene016445;Unigene017360;Unigene019246;Unigene021316;Unigene021642;Unigene023265;Unigene026707;Unigene029456;Unigene034826;Unigene035463;Unigene035467;Unigene038745;Unigene039245;Unigene042475;Unigene042934;Unigene…	K10993+K03165+K03165+K11832+K11137+K10740+K03511+K07466+K08991+K08991+K10894+K10895+K10895+K10901+K10895+K10605+K03509+K15362+K15360+K10870+K10606+K15360+K10870+K15078+K13960+K11511+K10870+K10858+K15365+K08991+K08991+K08775+K08775+K10740+K10858+K10898+K10882+K10990+K10858+K10739+K10606+K10606+K10858+K11832+K10849+K10848+K03509+K08734+K03511+K10858+K02350+K15361+K04482+K03165+K10895+K03165+K10891+…
Organismal Systems	Endocrine system	Glucagon signaling pathway	182	ko04922	Unigene002420;Unigene003470;Unigene003503;Unigene004980;Unigene007191;Unigene007736;Unigene009318;Unigene010124;Unigene010837;Unigene014287;Unigene014406;Unigene014678;Unigene014743;Unigene014744;Unigene015316;Unigene015317;Unigene015860;Unigene016119;Unigene016120;Unigene016121;Unigene016515;Unigene017320;Unigene017912;Unigene018039;Unigene021802;Unigene021817;Unigene022725;Unigene023776;Unigene…	K13296+K04345+K07199+K04345+K02183+K00161+K06268+K07299+K00873+K04450+K05858+K17491+K17491+K17491+K16333+K16333+K11262+K04634+K04634+K04634+K08765+K04515+K04374+K19008+K04960+K04456+K15423+K04456+K02183+K02183+K00016+K02183+K02183+K07200+K00688+K02183+K02183+K04632+K07190+K04960+K00688+K02183+K13296+K04498+K02183+K04960+K17491+K04498+K02183+K07200+K00873+K04498+K02183+K11262+K11262+K02183+K11434+…
Genetic Information Processing	Replication and repair	Nucleotide excision repair	180	ko03420	Unigene001401;Unigene002213;Unigene003626;Unigene003627;Unigene003679;Unigene004922;Unigene006064;Unigene006241;Unigene006536;Unigene008429;Unigene008702;Unigene009345;Unigene011195;Unigene011502;Unigene011779;Unigene011908;Unigene015103;Unigene016055;Unigene016056;Unigene019424;Unigene021048;Unigene021049;Unigene022703;Unigene022704;Unigene022926;Unigene023720;Unigene025196;Unigene025899;Unigene…	K03868+K10610+K10756+K10756+K10609+K02327+K10609+K02327+K03868+K10740+K10609+K07466+K10839+K10847+K03141+K10846+K02327+K03868+K03868+K02328+K10839+K10839+K10755+K10755+K02326+K10839+K03506+K10839+K10756+K10842+K06634+K06634+K03141+K10754+K02326+K03142+K10570+K02328+K10740+K10847+K10609+K10756+K10839+K10739+K04802+K10755+K03868+K03504+K03506+K10140+K10755+K10755+K03142+K03144+K03144+K03144+K02325+…
Environmental Information Processing	Signal transduction	Jak-STAT signaling pathway	178	ko04630	Unigene001422;Unigene001423;Unigene003406;Unigene003407;Unigene006566;Unigene006567;Unigene006916;Unigene006957;Unigene007102;Unigene009350;Unigene009351;Unigene010614;Unigene010615;Unigene015072;Unigene015899;Unigene017216;Unigene017440;Unigene017808;Unigene017983;Unigene017984;Unigene021357;Unigene021437;Unigene021817;Unigene022435;Unigene022902;Unigene023220;Unigene023776;Unigene026897;Unigene…	K05060+K05060+K04364+K04364+K11220+K11220+K05057+K05132+K04703+K05072+K05072+K05130+K05130+K07293+K17383+K05130+K05072+K05071+K04705+K04705+K11219+K04498+K04456+K05072+K04377+K04707+K04456+K04570+K11217+K05076+K00922+K11224+K10151+K03099+K04700+K04705+K16064+K04702+K04702+K04364+K04703+K07293+K02649+K00922+K04706+K04698+K04456+K04498+K04707+K04707+K05133+K04706+K05070+K10151+K11224+K04705+K05055+…
Human Diseases	Infectious diseases	Pertussis	177	ko05133	Unigene001221;Unigene001324;Unigene001465;Unigene001691;Unigene002381;Unigene003176;Unigene004122;Unigene007191;Unigene007958;Unigene008163;Unigene013873;Unigene014592;Unigene017273;Unigene017712;Unigene017713;Unigene018043;Unigene018090;Unigene018091;Unigene018447;Unigene019520;Unigene021233;Unigene021234;Unigene021443;Unigene023086;Unigene024389;Unigene024390;Unigene024391;Unigene024681;Unigene…	K04733+K05411+K04733+K04519+K04440+K04441+K04733+K02183+K04733+K04733+K04733+K02580+K04733+K04441+K04441+K04733+K04730+K04730+K04733+K04733+K04371+K04371+K04733+K04630+K04730+K04730+K04730+K04733+K02183+K04733+K02183+K04733+K02183+K02183+K04733+K04733+K05411+K05411+K05719+K05765+K04733+K02183+K02183+K12800+K04002+K12800+K06484+K01331+K04733+K04733+K02183+K06464+K04733+K04733+K04733+K04733+K01330+…
Environmental Information Processing	Signal transduction	Sphingolipid signaling pathway	177	ko04071	Unigene002087;Unigene002257;Unigene002258;Unigene002381;Unigene002844;Unigene003166;Unigene003167;Unigene003176;Unigene005532;Unigene006099;Unigene006100;Unigene008115;Unigene009023;Unigene009024;Unigene010073;Unigene010454;Unigene013493;Unigene014202;Unigene014203;Unigene014406;Unigene014592;Unigene015492;Unigene015493;Unigene016119;Unigene016120;Unigene016121;Unigene017712;Unigene017713;Unigene…	K02677+K18953+K18953+K04440+K11584+K00654+K00654+K04441+K04354+K06276+K06276+K07860+K02833+K02833+K02677+K12351+K04710+K05703+K05703+K05858+K02580+K04392+K04392+K04634+K04634+K04634+K04441+K04441+K01110+K11584+K04371+K04371+K11584+K11584+K04456+K04354+K04382+K04366+K04366+K04630+K04456+K02677+K12348+K02159+K01379+K04369+K05665+K04639+K03158+K04710+K01115+K01115+K05665+K01115+K17388+K04426+K04288+…
Metabolism	Global and Overview	Fatty acid metabolism	177	ko01212	Unigene001447;Unigene002132;Unigene003683;Unigene004327;Unigene005290;Unigene006962;Unigene007166;Unigene008580;Unigene008581;Unigene008680;Unigene015544;Unigene015860;Unigene015870;Unigene016251;Unigene016264;Unigene016311;Unigene016312;Unigene016515;Unigene016754;Unigene018417;Unigene021307;Unigene022590;Unigene023067;Unigene023990;Unigene024103;Unigene029488;Unigene029904;Unigene030466;Unigene…	K11262+K07513+K00249+K07511+K10224+K01897+K00232+K00232+K00232+K07511+K00022+K11262+K10703+K10257+K00626+K01897+K01897+K08765+K01074+K01897+K01074+K01897+K01897+K10257+K07512+K07513+K01897+K10244+K01897+K00232+K10257+K10703+K10251+K10226+K09479+K01074+K10257+K01897+K09479+K10703+K10251+K07753+K07753+K00665+K08766+K00507+K00626+K00232+K00232+K00232+K00626+K00022+K08765+K01074+K01074+K09478+K15013+…
Metabolism	Amino acid metabolism	Cysteine and methionine metabolism	175	ko00270	Unigene000878;Unigene002156;Unigene002336;Unigene002874;Unigene003374;Unigene004079;Unigene005434;Unigene005870;Unigene006604;Unigene007258;Unigene007259;Unigene008354;Unigene008355;Unigene008748;Unigene009817;Unigene009942;Unigene010235;Unigene012379;Unigene014232;Unigene014233;Unigene015481;Unigene015614;Unigene016168;Unigene016566;Unigene016574;Unigene016871;Unigene018569;Unigene019529;Unigene…	K00815+K00558+K01738+K01738+K01738+K00797+K01251+K14455+K00026+K01738+K01738+K08967+K08967+K00026+K00802+K09880+K08967+K08967+K00797+K00797+K14455+K00026+K00026+K00558+K00026+K00797+K14455+K00789+K01758+K09880+K01611+K01738+K00026+K01611+K08967+K00016+K01611+K00026+K01611+K01611+K01738+K01251+K17398+K00025+K00025+K00025+K01611+K00026+K08964+K17989+K00026+K00789+K00789+K00789+K00789+K00547+K01758+…
Human Diseases	Substance dependence	Alcoholism	174	ko05034	Unigene001634;Unigene003406;Unigene003407;Unigene006863;Unigene007191;Unigene007684;Unigene009023;Unigene009024;Unigene010982;Unigene011739;Unigene011873;Unigene014287;Unigene014291;Unigene014493;Unigene016135;Unigene017912;Unigene020516;Unigene021233;Unigene021234;Unigene022325;Unigene022602;Unigene022603;Unigene023086;Unigene023684;Unigene024607;Unigene025014;Unigene025221;Unigene025410;Unigene…	K06067+K04364+K04364+K06269+K02183+K11254+K02833+K02833+K06067+K11254+K11254+K04450+K11254+K11251+K06067+K04374+K11254+K04371+K04371+K11253+K04366+K04366+K04630+K06067+K11253+K02183+K11251+K02183+K02183+K02183+K06279+K04537+K11251+K11251+K11252+K11253+K11253+K11253+K06269+K11254+K11253+K11253+K11253+K11251+K11251+K02183+K02183+K11252+K11252+K04632+K11253+K11254+K11254+K11254+K11251+K11251+K11251+…
Metabolism	Amino acid metabolism	Valine, leucine and isoleucine degradation	174	ko00280	Unigene002065;Unigene002132;Unigene003683;Unigene003971;Unigene004327;Unigene007293;Unigene007479;Unigene008680;Unigene011574;Unigene015544;Unigene015811;Unigene015812;Unigene016264;Unigene016705;Unigene017485;Unigene017710;Unigene017711;Unigene020774;Unigene021474;Unigene027732;Unigene028513;Unigene028760;Unigene029488;Unigene033334;Unigene033915;Unigene033916;Unigene037570;Unigene037826;Unigene…	K00166+K07513+K00249+K01907+K07511+K00382+K14085+K07511+K01969+K00022+K00020+K00020+K00626+K00128+K00826+K00140+K00140+K00128+K00128+K00020+K05605+K00128+K07513+K00128+K05605+K05605+K01640+K00166+K00826+K00826+K01966+K01966+K00382+K00626+K05606+K00140+K00020+K00626+K13524+K13524+K00022+K08683+K09478+K01641+K11538+K01907+K05605+K05605+K00128+K07508+K07508+K07511+K05607+K07509+K07509+K14085+K01969+…
Human Diseases	Infectious diseases	Leishmaniasis	174	ko05140	Unigene001221;Unigene001465;Unigene001691;Unigene001952;Unigene003176;Unigene004122;Unigene006566;Unigene006567;Unigene006957;Unigene007958;Unigene008163;Unigene010348;Unigene011829;Unigene012257;Unigene012414;Unigene012415;Unigene013552;Unigene013873;Unigene014592;Unigene015389;Unigene017273;Unigene017712;Unigene017713;Unigene018043;Unigene018090;Unigene018091;Unigene018447;Unigene019520;Unigene…	K04733+K04733+K04519+K06472+K04441+K04733+K11220+K11220+K05132+K04733+K04733+K04404+K06752+K13536+K06483+K06483+K06752+K04733+K02580+K06856+K04733+K04441+K04441+K04733+K04730+K04730+K04733+K04733+K04371+K04371+K04733+K13375+K04730+K04730+K04730+K04733+K08009+K04733+K04733+K06752+K11217+K04733+K04733+K06856+K05719+K06752+K04733+K04734+K04734+K05133+K04375+K04733+K04733+K06464+K04733+K06483+K04733+…
Environmental Information Processing	Signal transduction	Notch signaling pathway	173	ko04330	Unigene001634;Unigene001895;Unigene002824;Unigene002922;Unigene005818;Unigene006181;Unigene008411;Unigene009847;Unigene010982;Unigene011748;Unigene011749;Unigene011833;Unigene011834;Unigene011835;Unigene012515;Unigene012661;Unigene015490;Unigene016135;Unigene016252;Unigene017818;Unigene019229;Unigene021437;Unigene023046;Unigene023155;Unigene023684;Unigene027687;Unigene029716;Unigene030979;Unigene…	K06067+K02353+K06063+K06059+K05948+K06065+K04496+K06052+K06067+K04496+K04496+K06065+K06065+K06065+K02353+K06066+K06053+K06067+K06065+K06063+K06171+K04498+K06067+K06052+K06067+K06057+K06172+K06052+K06067+K06059+K06171+K02599+K06170+K06172+K06172+K06059+K06059+K06062+K06062+K06053+K06063+K06057+K02353+K04505+K06066+K04496+K04496+K04498+K02599+K06058+K06058+K06058+K06058+K06059+K06059+K06059+K06059+…
Organismal Systems	Development	Osteoclast differentiation	173	ko04380	Unigene001691;Unigene001952;Unigene002381;Unigene002526;Unigene002965;Unigene002966;Unigene003176;Unigene003406;Unigene003407;Unigene006566;Unigene006567;Unigene006957;Unigene009318;Unigene009740;Unigene010245;Unigene010348;Unigene010614;Unigene010615;Unigene014202;Unigene014203;Unigene014592;Unigene015492;Unigene015493;Unigene016295;Unigene016296;Unigene017216;Unigene017712;Unigene017713;Unigene…	K04519+K06472+K04440+K04388+K04469+K04469+K04441+K04364+K04364+K11220+K11220+K05132+K06268+K08530+K08601+K04404+K05130+K05130+K05703+K05703+K02580+K04392+K04392+K08008+K08008+K05130+K04441+K04441+K07210+K04371+K04371+K11219+K04456+K13375+K04456+K14381+K08009+K14380+K11217+K03158+K04734+K04734+K08601+K05133+K04502+K04469+K08601+K05856+K04388+K11219+K03175+K11219+K02649+K04441+K04386+K04386+K05131+…
Environmental Information Processing	Signal transduction	HIF-1 signaling pathway	172	ko04066	Unigene001401;Unigene001499;Unigene002087;Unigene002577;Unigene003046;Unigene003047;Unigene003146;Unigene004036;Unigene006200;Unigene006957;Unigene007557;Unigene007558;Unigene007736;Unigene008754;Unigene010073;Unigene010124;Unigene010159;Unigene010788;Unigene012130;Unigene013096;Unigene013264;Unigene013265;Unigene014592;Unigene016295;Unigene016296;Unigene017213;Unigene017320;Unigene019398;Unigene…	K03868+K04361+K02677+K09097+K09592+K09592+K06624+K00844+K00844+K05132+K09592+K09592+K00161+K03259+K02677+K07299+K01689+K14736+K00844+K03870+K04372+K04372+K02580+K08008+K08008+K03871+K04515+K00844+K04371+K04371+K04456+K04456+K02677+K03159+K04369+K00134+K00134+K03259+K03982+K08268+K06503+K00844+K05465+K16451+K04688+K03870+K05133+K07203+K05055+K07203+K04498+K04692+K04498+K07203+K00844+K00844+K02649+…
Metabolism	Lipid metabolism	Fatty acid degradation	171	ko00071	Unigene002132;Unigene003189;Unigene003683;Unigene004327;Unigene006737;Unigene006962;Unigene007166;Unigene007479;Unigene008580;Unigene008581;Unigene008680;Unigene012847;Unigene012848;Unigene015544;Unigene016264;Unigene016311;Unigene016312;Unigene016515;Unigene016641;Unigene016705;Unigene017845;Unigene018417;Unigene020774;Unigene021474;Unigene022590;Unigene023067;Unigene028760;Unigene029488;Unigene…	K07513+K13239+K00249+K07511+K00121+K01897+K00232+K14085+K00232+K00232+K07511+K00121+K00121+K00022+K00626+K01897+K01897+K08765+K13951+K00128+K13238+K01897+K00128+K00128+K01897+K01897+K00128+K07513+K13239+K01897+K01897+K00232+K00128+K09479+K01897+K09479+K08766+K00626+K00232+K00232+K00232+K00626+K00022+K08765+K09478+K15013+K13239+K01897+K00128+K15013+K15013+K00232+K07508+K07508+K07511+K07509+K07509+…
Metabolism	Metabolism of other amino acids	Glutathione metabolism	171	ko00480	Unigene000990;Unigene001255;Unigene003876;Unigene003894;Unigene003895;Unigene004079;Unigene009817;Unigene011102;Unigene011182;Unigene011186;Unigene011187;Unigene011507;Unigene012304;Unigene012934;Unigene013836;Unigene014097;Unigene014098;Unigene014232;Unigene014233;Unigene014687;Unigene014730;Unigene015892;Unigene016865;Unigene016871;Unigene018159;Unigene018727;Unigene018831;Unigene020975;Unigene…	K00799+K00799+K00799+K00031+K00031+K00797+K00802+K00033+K11204+K10808+K10808+K00799+K00799+K00799+K11140+K00432+K00432+K00797+K00797+K00799+K00799+K00799+K01920+K00797+K00799+K00799+K05360+K00799+K00036+K11142+K00432+K00432+K10808+K10808+K00383+K00799+K00432+K00799+K00799+K00033+K10807+K00432+K00799+K00036+K05361+K00799+K00799+K00799+K11205+K11205+K11205+K00432+K00799+K00799+K00799+K00799+K00799+…
Organismal Systems	Development	Axon guidance	169	ko04360	Unigene000334;Unigene000335;Unigene005067;Unigene005913;Unigene006122;Unigene008115;Unigene009023;Unigene009024;Unigene009318;Unigene009440;Unigene009657;Unigene009809;Unigene012619;Unigene012873;Unigene013919;Unigene014202;Unigene014203;Unigene015050;Unigene015492;Unigene015493;Unigene015565;Unigene017009;Unigene017010;Unigene021160;Unigene021233;Unigene021234;Unigene021890;Unigene023086;Unigene…	K06840+K06840+K07530+K06821+K06820+K07860+K02833+K02833+K06268+K07520+K06521+K06821+K07526+K06840+K06820+K05703+K05703+K07526+K04392+K04392+K05113+K05734+K05734+K07532+K04371+K04371+K06843+K04630+K17333+K17333+K17333+K06820+K06820+K06724+K03083+K05725+K05719+K05765+K06850+K06724+K05099+K05733+K06820+K17388+K06619+K05113+K05462+K06753+K07861+K02090+K05743+K06840+K06521+K04514+K04513+K06820+K06821+…
Metabolism	Carbohydrate metabolism	Glyoxylate and dicarboxylate metabolism	168	ko00630	Unigene003756;Unigene006604;Unigene007159;Unigene007160;Unigene007293;Unigene007353;Unigene008036;Unigene008748;Unigene010745;Unigene012146;Unigene012147;Unigene012776;Unigene015591;Unigene015592;Unigene015614;Unigene016168;Unigene016264;Unigene016476;Unigene016574;Unigene016666;Unigene017031;Unigene018387;Unigene021065;Unigene021461;Unigene022899;Unigene023821;Unigene024224;Unigene024874;Unigene…	K00600+K00026+K15788+K15788+K00382+K01915+K19269+K00026+K11517+K11517+K11517+K01681+K01915+K01915+K00026+K00026+K00626+K00600+K00026+K19269+K00600+K00600+K00600+K01647+K00049+K18123+K00026+K01647+K00600+K19269+K01915+K02437+K01432+K01432+K01432+K00026+K01915+K00025+K00025+K00025+K00026+K03781+K11517+K11517+K11517+K00281+K01915+K00026+K00605+K01966+K01966+K19269+K19269+K00605+K00600+K00281+K00281+…
Human Diseases	Cancers	Prostate cancer	166	ko05215	Unigene001499;Unigene003120;Unigene003146;Unigene003406;Unigene003407;Unigene003850;Unigene006099;Unigene006100;Unigene009023;Unigene009024;Unigene012089;Unigene012669;Unigene014592;Unigene015657;Unigene016506;Unigene017912;Unigene017944;Unigene019038;Unigene021142;Unigene021233;Unigene021234;Unigene021817;Unigene022602;Unigene022603;Unigene023776;Unigene027642;Unigene027892;Unigene029603;Unigene…	K04361+K02620+K06624+K04364+K04364+K02206+K06276+K06276+K02833+K02833+K06626+K17454+K02580+K02620+K04492+K04374+K01110+K07210+K08557+K04371+K04371+K04456+K04366+K04366+K04456+K00799+K04369+K04079+K04079+K04079+K03083+K09487+K04079+K04492+K04492+K02105+K04734+K04734+K04079+K07203+K02206+K08845+K02620+K07203+K17454+K04498+K04451+K04498+K07203+K03083+K02649+K04498+K04361+K04503+K05087+K02620+K07201+…
Organismal Systems	Immune system	T cell receptor signaling pathway	166	ko04660	Unigene003176;Unigene003406;Unigene003407;Unigene006099;Unigene006100;Unigene008932;Unigene008933;Unigene008934;Unigene009023;Unigene009024;Unigene009318;Unigene013874;Unigene013924;Unigene013925;Unigene014202;Unigene014203;Unigene014592;Unigene015461;Unigene015462;Unigene016661;Unigene017009;Unigene017010;Unigene017712;Unigene017713;Unigene019038;Unigene020539;Unigene021233;Unigene021234;Unigene…	K04441+K04364+K04364+K06276+K06276+K12076+K12076+K12076+K02833+K02833+K06268+K05730+K06478+K06478+K05703+K05703+K02580+K07365+K07365+K07362+K05734+K05734+K04441+K04441+K07210+K02089+K04371+K04371+K04456+K04366+K04366+K04707+K17333+K17333+K17333+K04456+K04369+K03083+K10785+K10785+K04734+K04734+K06478+K06478+K05733+K07363+K07365+K05856+K02581+K07363+K07363+K04513+K05734+K03083+K07367+K02649+K04441+…
Organismal Systems	Endocrine system	Progesterone-mediated oocyte maturation	166	ko04914	Unigene000364;Unigene002381;Unigene002420;Unigene002991;Unigene003176;Unigene003470;Unigene003850;Unigene004083;Unigene004980;Unigene008206;Unigene014784;Unigene015656;Unigene017712;Unigene017713;Unigene017761;Unigene018352;Unigene018353;Unigene021233;Unigene021234;Unigene021323;Unigene021817;Unigene022602;Unigene022603;Unigene023086;Unigene023776;Unigene027597;Unigene029603;Unigene029604;Unigene…	K06633+K04440+K13296+K03359+K04441+K04345+K02206+K08043+K04345+K08046+K06638+K03353+K04441+K04441+K03350+K08043+K08043+K04371+K04371+K05868+K04456+K04366+K04366+K04630+K04456+K03348+K04079+K04079+K04079+K03352+K03352+K04373+K04373+K00922+K04079+K03350+K02537+K06631+K02206+K13728+K08694+K04079+K03355+K03355+K02178+K04373+K08046+K02206+K08845+K08047+K06633+K08047+K13296+K03364+K03355+K03348+K08046+…
Metabolism	Xenobiotics biodegradation and metabolism	Metabolism of xenobiotics by cytochrome P450	164	ko00980	Unigene000990;Unigene001255;Unigene001878;Unigene001879;Unigene001880;Unigene003731;Unigene003876;Unigene006254;Unigene006737;Unigene008593;Unigene008594;Unigene008995;Unigene009505;Unigene010955;Unigene011507;Unigene012304;Unigene012847;Unigene012848;Unigene012934;Unigene014687;Unigene014730;Unigene015892;Unigene016641;Unigene017494;Unigene017765;Unigene018159;Unigene018727;Unigene019203;Unigene…	K00799+K00799+K00079+K00079+K00079+K00079+K00799+K00129+K00121+K17690+K17690+K00078+K17685+K00078+K00799+K00799+K00121+K00121+K00799+K00799+K00799+K00799+K13951+K00699+K00699+K00799+K00799+K00699+K00699+K00799+K00699+K00699+K00699+K00699+K00699+K00699+K00079+K00799+K00078+K00799+K00799+K00699+K00799+K00699+K00799+K00799+K00699+K00699+K00699+K00699+K00799+K00799+K00799+K00799+K00799+K00799+K13299+…
Human Diseases	Cancers	Small cell lung cancer	163	ko05222	Unigene000786;Unigene001374;Unigene003850;Unigene007378;Unigene009274;Unigene010161;Unigene010673;Unigene010674;Unigene012089;Unigene012246;Unigene012669;Unigene013683;Unigene014553;Unigene014554;Unigene014592;Unigene016049;Unigene016357;Unigene016444;Unigene017944;Unigene018326;Unigene019038;Unigene020539;Unigene021369;Unigene021817;Unigene022902;Unigene023776;Unigene026509;Unigene026897;Unigene…	K06244+K09848+K02206+K06240+K06244+K02219+K04453+K04453+K06626+K06240+K17454+K16060+K09848+K09848+K02580+K03875+K16060+K05635+K01110+K08738+K07210+K02089+K06244+K04456+K04377+K04456+K16060+K04570+K05636+K06487+K06482+K05725+K04685+K08738+K05719+K02219+K06485+K05717+K04734+K04734+K08738+K08738+K06240+K02206+K06240+K17454+K06240+K06240+K08524+K08528+K04451+K03175+K08525+K02649+K05725+K05725+K04503+…
Human Diseases	Infectious diseases	Amoebiasis	161	ko05146	Unigene000786;Unigene001294;Unigene001691;Unigene002087;Unigene003470;Unigene004662;Unigene004980;Unigene005527;Unigene005682;Unigene007378;Unigene008157;Unigene009274;Unigene010073;Unigene010704;Unigene011162;Unigene012246;Unigene014406;Unigene014592;Unigene015389;Unigene016119;Unigene016120;Unigene016121;Unigene016444;Unigene016656;Unigene017608;Unigene017640;Unigene018350;Unigene021369;Unigene…	K06244+K05700+K04519+K02677+K04345+K13963+K04345+K05699+K13963+K06240+K04455+K06244+K02677+K04635+K05699+K06240+K05858+K02580+K06856+K04634+K04634+K04634+K05635+K05700+K07887+K13963+K13963+K06244+K13375+K02677+K05636+K06236+K05699+K05725+K06856+K13963+K05699+K05699+K05717+K04632+K13963+K13963+K04637+K13963+K13963+K06240+K06464+K06240+K06240+K06856+K06240+K02649+K05725+K05725+K06241+K06241+K06243+…
Human Diseases	Cancers	Choline metabolism in cancer	161	ko05231	Unigene001499;Unigene002087;Unigene002381;Unigene003406;Unigene003407;Unigene006099;Unigene006100;Unigene008115;Unigene009023;Unigene009024;Unigene010073;Unigene010736;Unigene011321;Unigene011322;Unigene011676;Unigene011677;Unigene011992;Unigene011993;Unigene012623;Unigene012624;Unigene015492;Unigene015493;Unigene016559;Unigene016560;Unigene018180;Unigene018597;Unigene018598;Unigene020638;Unigene…	K04361+K02677+K04440+K04364+K04364+K06276+K06276+K07860+K02833+K02833+K02677+K08732+K00994+K00994+K18695+K18695+K00901+K00901+K00968+K00968+K04392+K04392+K07207+K07207+K04684+K07208+K07208+K01080+K04371+K04371+K04456+K00889+K04366+K04366+K04456+K02677+K04369+K06515+K14156+K14156+K08268+K01115+K01115+K04684+K01115+K04688+K07203+K08200+K05748+K07861+K07203+K08732+K05748+K07203+K08200+K14156+K07861+…
Organismal Systems	Immune system	Leukocyte transendothelial migration	157	ko04670	Unigene001294;Unigene002087;Unigene003176;Unigene005527;Unigene008115;Unigene010073;Unigene010689;Unigene011162;Unigene011482;Unigene012414;Unigene012415;Unigene013499;Unigene013874;Unigene015072;Unigene015492;Unigene015493;Unigene016295;Unigene016296;Unigene016577;Unigene016578;Unigene016656;Unigene017712;Unigene017713;Unigene021601;Unigene023086;Unigene023951;Unigene024803;Unigene026347;Unigene…	K05700+K02677+K04441+K05699+K07860+K02677+K06471+K05699+K05871+K06483+K06483+K05692+K05730+K07293+K04392+K04392+K08008+K08008+K13709+K13709+K05700+K04441+K04441+K06087+K04630+K02677+K08009+K05691+K05760+K05692+K08007+K05692+K05760+K05760+K06520+K06520+K05699+K05725+K08007+K05690+K05699+K05699+K05719+K02105+K05763+K12757+K05692+K05692+K05692+K05692+K05692+K05692+K05692+K05692+K05692+K17388+K05702+…
Metabolism	Glycan biosynthesis and metabolism	N-Glycan biosynthesis	157	ko00510	Unigene001000;Unigene001001;Unigene001002;Unigene001243;Unigene003577;Unigene003628;Unigene004006;Unigene005144;Unigene006701;Unigene007034;Unigene008281;Unigene009669;Unigene010828;Unigene012603;Unigene014537;Unigene016984;Unigene017140;Unigene017380;Unigene018692;Unigene019854;Unigene020464;Unigene020465;Unigene020613;Unigene022097;Unigene027280;Unigene027281;Unigene029611;Unigene030515;Unigene…	K01230+K01230+K01230+K00717+K09659+K03843+K01230+K03850+K12670+K03847+K00778+K09658+K12667+K03849+K00717+K00737+K07432+K03850+K12670+K00738+K00721+K00721+K12669+K12668+K07432+K07432+K01231+K03843+K12666+K07151+K07966+K07151+K07151+K12669+K05546+K09659+K00902+K12668+K01230+K00736+K07252+K03845+K03842+K01230+K03844+K03842+K00737+K01001+K03850+K12666+K12669+K00779+K00721+K12667+K07151+K03849+K03843+…
Human Diseases	Infectious diseases	Salmonella infection	156	ko05132	Unigene000977;Unigene001691;Unigene002381;Unigene003176;Unigene005943;Unigene006030;Unigene006957;Unigene007019;Unigene008297;Unigene010701;Unigene013499;Unigene014592;Unigene015057;Unigene015152;Unigene015492;Unigene015493;Unigene016469;Unigene017712;Unigene017713;Unigene018832;Unigene018833;Unigene019434;Unigene021233;Unigene021234;Unigene022724;Unigene024176;Unigene025258;Unigene025431;Unigene…	K10413+K04519+K04440+K04441+K05754+K05754+K05132+K10416+K04393+K05747+K05692+K02580+K05701+K05755+K04392+K04392+K07863+K04441+K04441+K05692+K05692+K05747+K04371+K04371+K05756+K10413+K10413+K10407+K05759+K05692+K05692+K05759+K05408+K04437+K05758+K05692+K05692+K04437+K05692+K05757+K05692+K05692+K12805+K05692+K05692+K05692+K10415+K05692+K05692+K06071+K10413+K05133+K17388+K05748+K07897+K04514+K05748+…
Organismal Systems	Nervous system	Dopaminergic synapse	154	ko04728	Unigene002087;Unigene002381;Unigene002844;Unigene003176;Unigene003470;Unigene004980;Unigene005532;Unigene006863;Unigene007191;Unigene010073;Unigene014287;Unigene014406;Unigene016119;Unigene016120;Unigene016121;Unigene017320;Unigene017712;Unigene017713;Unigene017912;Unigene020000;Unigene021615;Unigene021616;Unigene021802;Unigene021817;Unigene022217;Unigene022550;Unigene023086;Unigene023776;Unigene…	K02677+K04440+K11584+K04441+K04345+K04345+K04354+K06269+K02183+K02677+K04450+K05858+K04634+K04634+K04634+K04515+K04441+K04441+K04374+K11584+K11584+K11584+K04960+K04456+K04354+K04382+K04630+K04456+K02677+K02183+K02183+K02183+K02183+K04537+K00545+K03083+K10396+K10396+K06269+K02183+K02183+K04632+K04960+K02183+K02183+K04960+K09049+K03083+K02183+K04542+K11584+K02183+K03456+K04441+K02183+K08822+K11583+…
Metabolism	Carbohydrate metabolism	Pentose and glucuronate interconversions	153	ko00040	Unigene002962;Unigene002963;Unigene004345;Unigene006391;Unigene008104;Unigene008995;Unigene010955;Unigene012801;Unigene015918;Unigene015919;Unigene016705;Unigene017494;Unigene017553;Unigene017765;Unigene019203;Unigene019490;Unigene020774;Unigene021291;Unigene021292;Unigene021449;Unigene021474;Unigene021527;Unigene023099;Unigene023889;Unigene024125;Unigene025026;Unigene025917;Unigene026301;Unigene…	K00963+K00963+K00963+K00008+K01783+K00078+K00078+K01805+K00011+K00011+K00128+K00699+K01783+K00699+K00699+K00699+K00128+K00699+K00699+K00002+K00128+K00699+K00699+K00699+K00699+K01195+K00011+K00963+K00963+K00963+K00078+K00128+K00008+K03331+K00699+K00128+K00699+K00699+K00699+K00699+K00699+K00011+K00011+K00011+K00012+K03331+K00699+K01805+K00008+K00011+K00011+K00699+K01783+K01783+K00699+K00011+K00078+…
Metabolism	Amino acid metabolism	Alanine, aspartate and glutamate metabolism	153	ko00250	Unigene001457;Unigene002674;Unigene003057;Unigene005870;Unigene007353;Unigene009090;Unigene009511;Unigene010911;Unigene010912;Unigene011086;Unigene015330;Unigene015481;Unigene015591;Unigene015592;Unigene015933;Unigene015934;Unigene016216;Unigene016773;Unigene018569;Unigene018897;Unigene018942;Unigene019004;Unigene021118;Unigene021759;Unigene023459;Unigene024019;Unigene024037;Unigene024398;Unigene…	K00814+K00820+K00264+K14455+K01915+K00820+K01939+K01756+K01756+K00814+K01425+K14455+K01915+K01915+K00827+K00827+K01953+K00827+K14455+K18309+K00827+K00264+K00264+K01756+K13566+K00264+K01580+K00261+K00294+K00261+K00261+K01915+K01580+K01915+K01580+K01915+K00814+K11540+K13524+K13524+K00264+K00830+K01939+K01425+K00820+K00820+K00820+K00820+K00820+K00820+K00820+K00820+K00820+K00261+K00261+K14455+K11540+…
Metabolism	Carbohydrate metabolism	Fructose and mannose metabolism	151	ko00051	Unigene002245;Unigene002838;Unigene004036;Unigene004263;Unigene006079;Unigene006200;Unigene006391;Unigene007566;Unigene008212;Unigene010815;Unigene012130;Unigene012801;Unigene015918;Unigene015919;Unigene018388;Unigene018397;Unigene019291;Unigene019398;Unigene020074;Unigene024412;Unigene024413;Unigene024471;Unigene025917;Unigene026680;Unigene026762;Unigene029633;Unigene031075;Unigene032518;Unigene…	K00850+K17497+K00844+K00966+K01803+K00844+K00008+K01623+K19030+K01711+K00844+K01805+K00011+K00011+K01711+K01623+K00850+K00844+K01623+K01623+K01623+K01623+K00011+K03841+K01803+K00008+K01623+K01623+K01623+K00850+K00011+K00011+K00011+K02377+K01623+K01623+K00966+K00966+K01805+K01623+K19029+K00008+K01623+K00011+K00011+K00846+K00011+K00844+K01711+K01803+K03841+K00844+K01803+K14634+K01809+K01809+K18334+…
Human Diseases	Neurodegenerative diseases	Parkinson's disease	150	ko05012	Unigene000817;Unigene003130;Unigene003470;Unigene003543;Unigene003544;Unigene003970;Unigene004118;Unigene004573;Unigene004980;Unigene004997;Unigene005301;Unigene006080;Unigene006301;Unigene006575;Unigene006576;Unigene007066;Unigene007412;Unigene007413;Unigene008107;Unigene009116;Unigene009794;Unigene010309;Unigene011079;Unigene015295;Unigene015611;Unigene015889;Unigene015923;Unigene015962;Unigene…	K02133+K02128+K04345+K03939+K03939+K05687+K03953+K03937+K04345+K03943+K03955+K15041+K02266+K10575+K10575+K02132+K11351+K11351+K02267+K03956+K03178+K02273+K00415+K02135+K00413+K00411+K03965+K00418+K03942+K02132+K08738+K02134+K05863+K02270+K02265+K02137+K02136+K02263+K04552+K04630+K02268+K02138+K03948+K00236+K15040+K02128+K05611+K05862+K09565+K03952+K02272+K08738+K03968+K04551+K02137+K00234+K04551+…
Cellular Processes	Cell growth and death	p53 signaling pathway	149	ko04115	Unigene001596;Unigene003261;Unigene003850;Unigene005537;Unigene010671;Unigene010705;Unigene011186;Unigene011187;Unigene012089;Unigene012362;Unigene012363;Unigene013538;Unigene013539;Unigene014610;Unigene016555;Unigene016556;Unigene016559;Unigene016560;Unigene017944;Unigene018326;Unigene020539;Unigene021323;Unigene026250;Unigene026388;Unigene027277;Unigene027278;Unigene029284;Unigene031318;Unigene…	K10144+K04728+K02206+K04722+K04506+K10135+K10808+K10808+K06626+K10147+K10147+K04728+K04728+K10127+K10145+K10145+K07207+K07207+K01110+K08738+K02089+K05868+K02159+K10144+K10808+K10808+K10130+K04728+K10144+K10136+K08738+K03982+K16857+K10151+K10143+K02206+K10142+K04398+K10142+K10140+K10127+K08738+K08738+K08738+K10127+K06641+K06641+K06641+K04398+K04728+K04398+K02084+K02206+K10147+K10144+K06640+K04506+…
Metabolism	Amino acid metabolism	Arginine and proline metabolism	147	ko00330	Unigene004079;Unigene004845;Unigene005714;Unigene005870;Unigene007479;Unigene009817;Unigene011575;Unigene014232;Unigene014233;Unigene015481;Unigene016348;Unigene016705;Unigene016871;Unigene018569;Unigene020774;Unigene021474;Unigene022595;Unigene022959;Unigene023821;Unigene024386;Unigene025386;Unigene027745;Unigene028396;Unigene028689;Unigene028760;Unigene030879;Unigene030880;Unigene032231;Unigene…	K00797+K00472+K00472+K14455+K14085+K00802+K00472+K00797+K00797+K14455+K00933+K00128+K00797+K14455+K00128+K00128+K01611+K11142+K18123+K01611+K00294+K08660+K01611+K00657+K00128+K01611+K01611+K01611+K00128+K01480+K00657+K00657+K00657+K00286+K00472+K00318+K00273+K11142+K01581+K00472+K14455+K00802+K00933+K01611+K01611+K00128+K00657+K14085+K08660+K08660+K00819+K00128+K14454+K00797+K00797+K00472+K00149+…
Metabolism	Xenobiotics biodegradation and metabolism	Drug metabolism - other enzymes	147	ko00983	Unigene000025;Unigene006471;Unigene006626;Unigene009262;Unigene009563;Unigene009564;Unigene010253;Unigene016589;Unigene016590;Unigene017494;Unigene017765;Unigene019203;Unigene019490;Unigene021268;Unigene021291;Unigene021292;Unigene021527;Unigene023099;Unigene023643;Unigene023889;Unigene024125;Unigene025026;Unigene027856;Unigene027916;Unigene028546;Unigene029976;Unigene031760;Unigene032897;Unigene…	K00876+K00106+K03927+K00088+K00876+K00876+K00876+K00569+K00569+K00699+K00699+K00699+K00699+K00876+K00699+K00699+K00699+K00699+K00876+K00699+K00699+K01195+K13421+K00857+K00758+K00569+K00699+K01044+K00106+K00106+K00699+K00699+K00699+K00699+K00699+K00699+K00876+K01951+K00699+K00699+K01431+K01431+K00106+K00569+K00106+K13421+K00699+K00088+K01195+K00757+K00207+K00876+K00569+K00106+K01464+K00760+K00760+…
Environmental Information Processing	Membrane transport	ABC transporters	147	ko02010	Unigene001410;Unigene002091;Unigene002306;Unigene004983;Unigene008132;Unigene012258;Unigene012779;Unigene012859;Unigene013935;Unigene014800;Unigene014801;Unigene016512;Unigene025040;Unigene025492;Unigene030156;Unigene032084;Unigene040993;Unigene040994;Unigene045378;Unigene047044;Unigene050494;Unigene051678;Unigene055569;Unigene056280;Unigene059198;Unigene061641;Unigene061964;Unigene062312;Unigene…	K05668+K05664+K05641+K05642+K05645+K05654+K05645+K05665+K05662+K05658+K05658+K05681+K05669+K05665+K05673+K05665+K05652+K05652+K05673+K05666+K05676+K05674+K05677+K05643+K05661+K05678+K05665+K05665+K05665+K05665+K05665+K05668+K05662+K05662+K05672+K05665+K05655+K05657+K05657+K05657+K05665+K05666+K05665+K05665+K05648+K05659+K05658+K05667+K05657+K05665+K05675+K05678+K05655+K05657+K05656+K05668+K05645+…
Environmental Information Processing	Signal transduction	TNF signaling pathway	145	ko04668	Unigene001691;Unigene002381;Unigene003176;Unigene010060;Unigene010061;Unigene010262;Unigene010348;Unigene012497;Unigene013300;Unigene013301;Unigene013683;Unigene014287;Unigene014592;Unigene016011;Unigene016357;Unigene017712;Unigene017713;Unigene017912;Unigene018474;Unigene019038;Unigene021233;Unigene021234;Unigene021817;Unigene023776;Unigene025486;Unigene026509;Unigene027367;Unigene030979;Unigene…	K04519+K04440+K04441+K12793+K12793+K02861+K04404+K04724+K10048+K10048+K16060+K04450+K02580+K15637+K16060+K04441+K04441+K04374+K11859+K07210+K04371+K04371+K04456+K04456+K05632+K16060+K16510+K06052+K03158+K11859+K11859+K11859+K04734+K04734+K04426+K04398+K07763+K09049+K09558+K02649+K04432+K04441+K04724+K04432+K09849+K04466+K04415+K09048+K04441+K00922+K04371+K17065+K00922+K05453+K05453+K02649+K06490+…
Organismal Systems	Immune system	Fc gamma R-mediated phagocytosis	144	ko04666	Unigene000858;Unigene000859;Unigene000938;Unigene001952;Unigene002087;Unigene004718;Unigene004745;Unigene004746;Unigene005943;Unigene006030;Unigene006630;Unigene008115;Unigene010073;Unigene010844;Unigene011019;Unigene012257;Unigene013874;Unigene013924;Unigene013925;Unigene015152;Unigene015389;Unigene015492;Unigene015493;Unigene015951;Unigene016659;Unigene016660;Unigene016661;Unigene017392;Unigene…	K04438+K04438+K15909+K06472+K02677+K05768+K12559+K12559+K05754+K05754+K07941+K07860+K02677+K12488+K15909+K13536+K05730+K06478+K06478+K05755+K06856+K04392+K04392+K12561+K06068+K06068+K07362+K12367+K01080+K04371+K04371+K04456+K00889+K04366+K04366+K05756+K04456+K02677+K05854+K12488+K06856+K05758+K05765+K06478+K06478+K05757+K01115+K01115+K01115+K04688+K05748+K06068+K05743+K06068+K12367+K06856+K06274+…
Organismal Systems	Sensory system	Inflammatory mediator regulation of TRP channels	144	ko04750	Unigene001691;Unigene002087;Unigene002381;Unigene003176;Unigene003470;Unigene004083;Unigene004980;Unigene006863;Unigene007191;Unigene008206;Unigene010073;Unigene014406;Unigene014585;Unigene016119;Unigene016120;Unigene016121;Unigene016607;Unigene016659;Unigene016660;Unigene017320;Unigene017712;Unigene017713;Unigene018352;Unigene018353;Unigene021802;Unigene023951;Unigene025014;Unigene025410;Unigene…	K04519+K02677+K04440+K04441+K04345+K08043+K04345+K06269+K02183+K08046+K02677+K05858+K04971+K04634+K04634+K04634+K05704+K06068+K06068+K04515+K04441+K04441+K08043+K08043+K04960+K02677+K02183+K02183+K02183+K02183+K06269+K02183+K02183+K04632+K04984+K08046+K08047+K04960+K08047+K02183+K06068+K07425+K06068+K02183+K04960+K08046+K05704+K08047+K02183+K02649+K05704+K04432+K02183+K04441+K02183+K04386+K04386+…
Metabolism	Xenobiotics biodegradation and metabolism	Drug metabolism - cytochrome P450	143	ko00982	Unigene000990;Unigene001255;Unigene003876;Unigene006254;Unigene006737;Unigene008593;Unigene008594;Unigene011507;Unigene012304;Unigene012847;Unigene012848;Unigene012934;Unigene014687;Unigene014730;Unigene015892;Unigene016641;Unigene017494;Unigene017765;Unigene018159;Unigene018727;Unigene019203;Unigene019490;Unigene020975;Unigene021291;Unigene021292;Unigene021527;Unigene023099;Unigene023889;Unigene…	K00799+K00799+K00799+K00129+K00121+K17690+K17690+K00799+K00799+K00121+K00121+K00799+K00799+K00799+K00799+K13951+K00699+K00699+K00799+K00799+K00699+K00699+K00799+K00699+K00699+K00699+K00699+K00699+K00699+K00799+K00485+K00799+K00799+K00699+K00799+K00699+K00799+K00799+K00699+K00699+K00699+K00699+K00799+K00799+K00799+K00799+K00799+K00799+K13299+K00799+K00699+K00799+K00129+K00699+K00699+K00799+K00799+…
Genetic Information Processing	Transcription	Basal transcription factors	143	ko03022	Unigene005843;Unigene006380;Unigene008978;Unigene009518;Unigene011576;Unigene011779;Unigene012870;Unigene022933;Unigene023781;Unigene027282;Unigene027283;Unigene028713;Unigene031750;Unigene037043;Unigene038078;Unigene038079;Unigene038608;Unigene039684;Unigene042582;Unigene043435;Unigene043784;Unigene044291;Unigene044299;Unigene047712;Unigene047918;Unigene048669;Unigene049792;Unigene051161;Unigene…	K03123+K03130+K14535+K03134+K03126+K03141+K03123+K03122+K03124+K14651+K14651+K03131+K10842+K03132+K06634+K06634+K03141+K03134+K03139+K03128+K03123+K03142+K03133+K03120+K03129+K03126+K03122+K03121+K03136+K03120+K03137+K14649+K03131+K03130+K03135+K03124+K14650+K03138+K03130+K03142+K03144+K03144+K03144+K10844+K10844+K02202+K10843+K03143+K03132+K03125+K03125+K03131+K03121+K03124+K03128+K03131+K03141+…
Metabolism	Amino acid metabolism	Glycine, serine and threonine metabolism	138	ko00260	Unigene003316;Unigene003317;Unigene003756;Unigene004292;Unigene005113;Unigene005114;Unigene007159;Unigene007160;Unigene007293;Unigene007479;Unigene010458;Unigene011794;Unigene015933;Unigene015934;Unigene016476;Unigene016773;Unigene017031;Unigene017411;Unigene018387;Unigene018942;Unigene019745;Unigene020166;Unigene021065;Unigene022899;Unigene025177;Unigene025249;Unigene027391;Unigene028458;Unigene…	K00306+K00306+K00600+K01079+K01079+K01079+K15788+K15788+K00382+K14085+K00831+K01620+K00827+K00827+K00600+K00827+K00600+K01079+K00600+K00827+K00108+K01758+K00600+K00049+K00600+K00315+K00314+K00108+K02437+K00108+K17989+K00281+K00831+K00605+K00605+K00315+K01620+K01620+K00600+K00281+K00281+K00382+K01620+K01758+K00830+K00273+K00643+K00315+K00315+K01834+K00552+K01697+K00639+K00281+K00049+K14085+K12235+…
Genetic Information Processing	Replication and repair	Base excision repair	137	ko03410	Unigene002437;Unigene004922;Unigene006241;Unigene007786;Unigene008019;Unigene012945;Unigene015103;Unigene016712;Unigene016726;Unigene017372;Unigene019424;Unigene022926;Unigene022957;Unigene025196;Unigene027373;Unigene027913;Unigene027914;Unigene032019;Unigene032057;Unigene032058;Unigene037066;Unigene038291;Unigene042173;Unigene042370;Unigene044848;Unigene046514;Unigene047420;Unigene049098;Unigene…	K10803+K02327+K02327+K10798+K10802+K10798+K02327+K10798+K03648+K10803+K02328+K02326+K04799+K03506+K10771+K10798+K10798+K10803+K10801+K10801+K10801+K03512+K10776+K02326+K10773+K10802+K10567+K10798+K02328+K10773+K10771+K10798+K10798+K04802+K10803+K10803+K10802+K03649+K03504+K03652+K03652+K03652+K03506+K04799+K03660+K03649+K02325+K10569+K10569+K03648+K03648+K10747+K10798+K10772+K10772+K03575+K02330+…
Genetic Information Processing	Transcription	RNA polymerase	135	ko03020	Unigene000785;Unigene001333;Unigene005830;Unigene011715;Unigene012168;Unigene012431;Unigene012432;Unigene013046;Unigene014913;Unigene016477;Unigene020833;Unigene023219;Unigene023697;Unigene025718;Unigene025719;Unigene028576;Unigene029946;Unigene030442;Unigene032617;Unigene032618;Unigene032941;Unigene036555;Unigene036874;Unigene036875;Unigene042823;Unigene044733;Unigene045171;Unigene046290;Unigene…	K03013+K03012+K03019+K03006+K03007+K03012+K03012+K03006+K03010+K03013+K03006+K03009+K03010+K03019+K03019+K03027+K03006+K03007+K03016+K03016+K03015+K03023+K03022+K03022+K14721+K03020+K03016+K03013+K03009+K03017+K03015+K03025+K03000+K03007+K03007+K03007+K03027+K03014+K03012+K03012+K03026+K03011+K03010+K03008+K03023+K03005+K03018+K02999+K03019+K03021+K03004+K03002+K03010+K03016+K03006+K03012+K03020+…
Organismal Systems	Immune system	Natural killer cell mediated cytotoxicity	134	ko04650	Unigene002087;Unigene003406;Unigene003407;Unigene005537;Unigene005538;Unigene006957;Unigene008115;Unigene009023;Unigene009024;Unigene009318;Unigene010073;Unigene010614;Unigene010615;Unigene011199;Unigene011482;Unigene012956;Unigene013874;Unigene014198;Unigene014202;Unigene014203;Unigene015072;Unigene015389;Unigene015492;Unigene015493;Unigene016661;Unigene017216;Unigene021233;Unigene021234;Unigene…	K02677+K04364+K04364+K04722+K04722+K05132+K07860+K02833+K02833+K06268+K02677+K05130+K05130+K06728+K05871+K04722+K05730+K06751+K05703+K05703+K07293+K06856+K04392+K04392+K07362+K05130+K04371+K04371+K04366+K04366+K02677+K06279+K04369+K06856+K07987+K07987+K06751+K06751+K06751+K06751+K05133+K08845+K05871+K06464+K05856+K07861+K01353+K06856+K06479+K05718+K07861+K02649+K05131+K07983+K07988+K06541+K07984+…
Metabolism	Carbohydrate metabolism	Galactose metabolism	130	ko00052	Unigene002245;Unigene002268;Unigene002962;Unigene002963;Unigene004036;Unigene004345;Unigene005974;Unigene006200;Unigene009773;Unigene010777;Unigene010786;Unigene010787;Unigene011453;Unigene012130;Unigene012790;Unigene013698;Unigene015918;Unigene015919;Unigene019291;Unigene019398;Unigene020219;Unigene021421;Unigene023022;Unigene025917;Unigene026301;Unigene027121;Unigene027620;Unigene029661;Unigene…	K00850+K12309+K00963+K00963+K00844+K00963+K01229+K00844+K01785+K01784+K00849+K00849+K12316+K00844+K01835+K01784+K00011+K00011+K00850+K00844+K01835+K01835+K07407+K00011+K00963+K00963+K00963+K01784+K01189+K01189+K07966+K00850+K00011+K00011+K00011+K01784+K00011+K00011+K12047+K00011+K00844+K01784+K01784+K01785+K00963+K00844+K00849+K00849+K00849+K00850+K00965+K00965+K15779+K15779+K01084+K00844+K12316+…
Metabolism	Carbohydrate metabolism	Pentose phosphate pathway	130	ko00030	Unigene002245;Unigene007566;Unigene008104;Unigene009691;Unigene011102;Unigene012364;Unigene012790;Unigene017553;Unigene018397;Unigene019291;Unigene020074;Unigene020219;Unigene021127;Unigene021421;Unigene024412;Unigene024413;Unigene024471;Unigene026680;Unigene028795;Unigene028796;Unigene031075;Unigene031233;Unigene032518;Unigene032519;Unigene033225;Unigene035138;Unigene038376;Unigene040286;Unigene…	K00850+K01623+K01783+K00616+K00033+K01057+K01835+K01783+K01623+K00850+K01623+K01835+K00036+K01835+K01623+K01623+K01623+K03841+K00615+K00615+K01623+K00033+K01623+K01623+K00036+K00850+K00615+K01623+K01623+K01623+K00036+K01810+K01623+K01783+K01783+K01053+K03841+K00036+K00033+K00852+K01057+K00615+K00850+K15779+K15779+K01619+K01053+K01053+K01810+K01810+K01623+K00948+K00948+K01807+K01807+K01835+K00615+…
Environmental Information Processing	Signaling molecules and interaction	Cytokine-cytokine receptor interaction	130	ko04060	Unigene001422;Unigene001423;Unigene001499;Unigene001691;Unigene002526;Unigene005537;Unigene005538;Unigene006916;Unigene006957;Unigene009350;Unigene009351;Unigene010614;Unigene010615;Unigene012956;Unigene015013;Unigene017216;Unigene017440;Unigene017726;Unigene017808;Unigene020206;Unigene020207;Unigene021843;Unigene022435;Unigene027321;Unigene030716;Unigene030889;Unigene036238;Unigene045055;Unigene…	K05060+K05060+K04361+K04519+K04388+K04722+K04722+K05057+K05132+K05072+K05072+K05130+K05130+K04722+K05470+K05130+K05072+K10029+K05071+K05461+K05461+K13375+K05072+K03159+K05408+K05076+K03158+K04179+K05099+K05096+K05096+K05133+K04662+K05070+K05055+K05164+K04675+K04388+K05157+K05157+K04673+K04361+K04386+K04386+K05135+K05057+K05070+K05506+K05131+K05448+K05513+K05098+K04671+K05453+K05453+K05099+K04675+…
Human Diseases	Cancers	Chronic myeloid leukemia	128	ko05220	Unigene000858;Unigene000859;Unigene001634;Unigene002526;Unigene003146;Unigene003406;Unigene003407;Unigene008411;Unigene009023;Unigene009024;Unigene010982;Unigene011748;Unigene011749;Unigene012669;Unigene014592;Unigene015072;Unigene016135;Unigene019038;Unigene020539;Unigene021233;Unigene021234;Unigene021817;Unigene021843;Unigene022602;Unigene022603;Unigene022902;Unigene023220;Unigene023684;Unigene…	K04438+K04438+K06067+K04388+K06624+K04364+K04364+K04496+K02833+K02833+K06067+K04496+K04496+K17454+K02580+K07293+K06067+K07210+K02089+K04371+K04371+K04456+K13375+K04366+K04366+K04377+K04707+K06067+K04456+K04570+K06279+K04369+K04734+K04734+K08845+K11224+K06619+K17454+K08878+K04388+K04451+K08878+K02649+K04501+K04503+K06619+K06619+K06619+K06618+K04707+K00922+K04371+K00922+K06643+K02649+K11224+K04707+…
Human Diseases	Infectious diseases	Bacterial invasion of epithelial cells	128	ko05100	Unigene000429;Unigene000707;Unigene000858;Unigene000859;Unigene001294;Unigene005943;Unigene006030;Unigene009326;Unigene011558;Unigene012271;Unigene013499;Unigene015152;Unigene015492;Unigene015493;Unigene016469;Unigene016607;Unigene016656;Unigene018748;Unigene018749;Unigene021013;Unigene022574;Unigene022724;Unigene023089;Unigene023220;Unigene026347;Unigene026746;Unigene026747;Unigene027390;Unigene…	K13738+K01528+K04438+K04438+K05700+K05754+K05754+K04645+K13736+K01528+K05692+K05755+K04392+K04392+K07863+K05704+K05700+K16938+K16938+K04644+K04646+K05756+K06272+K04707+K05691+K06106+K06106+K05760+K06279+K05692+K05692+K05760+K05760+K05725+K12958+K01528+K05758+K06278+K05719+K04646+K02105+K05717+K16942+K05692+K16938+K05692+K05099+K13728+K05757+K05692+K05692+K05692+K05692+K05692+K05692+K05692+K06484+…
Metabolism	Lipid metabolism	Sphingolipid metabolism	126	ko00600	Unigene001705;Unigene002268;Unigene003166;Unigene003167;Unigene009559;Unigene010454;Unigene011405;Unigene011781;Unigene013493;Unigene014023;Unigene018236;Unigene018237;Unigene020638;Unigene021285;Unigene021468;Unigene023022;Unigene025432;Unigene027228;Unigene030095;Unigene030096;Unigene031946;Unigene036465;Unigene037699;Unigene043335;Unigene045189;Unigene045253;Unigene045752;Unigene047989;Unigene…	K12349+K12309+K00654+K00654+K00720+K12351+K04711+K00654+K04710+K04715+K17108+K17108+K01080+K00654+K12353+K07407+K12348+K01201+K01189+K01189+K12353+K12348+K04710+K01201+K12353+K04716+K01080+K00720+K04710+K01080+K12351+K12348+K12352+K17108+K04718+K04712+K04715+K00654+K00654+K04710+K04710+K04710+K04714+K12350+K04710+K01634+K01134+K12309+K04708+K04708+K01201+K04710+K00654+K01634+K00654+K12349+K04715+…
Genetic Information Processing	Replication and repair	DNA replication	126	ko03030	Unigene002595;Unigene003439;Unigene003626;Unigene003627;Unigene004730;Unigene004922;Unigene006241;Unigene008429;Unigene009345;Unigene010038;Unigene015103;Unigene016166;Unigene019424;Unigene022703;Unigene022704;Unigene022926;Unigene022957;Unigene025196;Unigene025845;Unigene031064;Unigene032638;Unigene032639;Unigene041443;Unigene042370;Unigene043476;Unigene044126;Unigene044391;Unigene049151;Unigene…	K02685+K10745+K10756+K10756+K10745+K02327+K02327+K10740+K07466+K02684+K02327+K02542+K02328+K10755+K10755+K02326+K04799+K03506+K10742+K10756+K03111+K03111+K10754+K02326+K10742+K03469+K02210+K02328+K10740+K10756+K03111+K10739+K03469+K04802+K02541+K10755+K02542+K03504+K03506+K02684+K10744+K04799+K02210+K02321+K10755+K10755+K02325+K10747+K10743+K10743+K10743+K02685+K02320+K07466+K02209+K02540+K02540+…
Metabolism	Metabolism of cofactors and vitamins	Porphyrin and chlorophyll metabolism	124	ko00860	Unigene010496;Unigene010497;Unigene017494;Unigene017707;Unigene017708;Unigene017765;Unigene018017;Unigene019203;Unigene019490;Unigene021291;Unigene021292;Unigene021527;Unigene023099;Unigene023889;Unigene024125;Unigene025026;Unigene026367;Unigene029942;Unigene031760;Unigene032162;Unigene032495;Unigene033520;Unigene035290;Unigene035777;Unigene035778;Unigene035779;Unigene035780;Unigene040567;Unigene…	K01599+K01599+K00699+K01749+K01749+K00699+K00231+K00699+K00699+K00699+K00699+K00699+K00699+K00699+K00699+K01195+K01772+K13624+K00699+K14163+K00214+K00699+K00231+K00699+K00699+K00699+K00699+K00699+K01749+K00699+K14163+K00699+K00643+K00699+K01885+K01195+K00510+K02257+K01698+K01764+K00798+K14163+K01599+K01698+K01772+K01772+K01772+K00228+K00228+K00228+K01195+K01195+K01195+K01195+K01599+K00699+K00643+…
Metabolism	Amino acid metabolism	Tryptophan metabolism	123	ko00380	Unigene000228;Unigene004327;Unigene006788;Unigene007479;Unigene008027;Unigene008265;Unigene008266;Unigene008680;Unigene014467;Unigene015522;Unigene015544;Unigene016264;Unigene016705;Unigene018316;Unigene019316;Unigene020774;Unigene021474;Unigene025667;Unigene028638;Unigene028760;Unigene029315;Unigene029674;Unigene029675;Unigene029676;Unigene033334;Unigene033564;Unigene035116;Unigene046602;Unigene…	K01501+K07511+K00164+K14085+K01556+K00816+K00816+K07511+K00486+K01501+K00022+K00626+K00128+K01556+K01593+K00128+K00128+K00543+K01501+K00128+K03392+K01432+K01432+K01432+K00128+K00825+K03781+K00825+K00626+K03781+K00626+K00022+K00816+K00453+K00825+K00825+K00452+K07408+K00128+K00816+K07511+K14085+K00164+K07515+K00486+K00486+K01432+K00128+K00149+K00128+K00128+K00252+K00252+K07408+K01501+K00128+K07408+…
Metabolism	Metabolism of cofactors and vitamins	Retinol metabolism	123	ko00830	Unigene003266;Unigene003386;Unigene003387;Unigene003856;Unigene004488;Unigene005942;Unigene006737;Unigene008593;Unigene008594;Unigene012847;Unigene012848;Unigene016190;Unigene016641;Unigene017494;Unigene017765;Unigene019203;Unigene019490;Unigene021042;Unigene021291;Unigene021292;Unigene021527;Unigene023099;Unigene023889;Unigene024125;Unigene031760;Unigene033520;Unigene035777;Unigene035778;Unigene…	K07437+K11146+K11146+K09516+K11147+K11155+K00121+K17690+K17690+K00121+K00121+K07249+K13951+K00699+K00699+K00699+K00699+K11147+K00699+K00699+K00699+K00699+K00699+K00699+K00699+K00699+K00699+K00699+K00699+K00699+K00699+K15734+K12665+K15734+K00699+K00699+K11147+K11147+K11147+K09516+K11153+K00699+K11155+K07408+K07424+K07424+K00121+K00121+K00121+K07408+K00699+K07408+K07409+K12665+K07425+K00699+K07424+…
Organismal Systems	Digestive system	Salivary secretion	122	ko04970	Unigene002087;Unigene003208;Unigene003470;Unigene004083;Unigene004564;Unigene004980;Unigene007191;Unigene008206;Unigene010073;Unigene010720;Unigene011863;Unigene014406;Unigene015869;Unigene016119;Unigene016120;Unigene016121;Unigene018352;Unigene018353;Unigene018802;Unigene020693;Unigene021802;Unigene023951;Unigene025014;Unigene025410;Unigene026843;Unigene026844;Unigene027404;Unigene033363;Unigene…	K02677+K04945+K04345+K08043+K05850+K04345+K02183+K08046+K02677+K05850+K13855+K05858+K05850+K04634+K04634+K04634+K08043+K08043+K01540+K13899+K04960+K02677+K02183+K02183+K02183+K02183+K05850+K05850+K01539+K02183+K02183+K04136+K04632+K13908+K13908+K13915+K13899+K08046+K08047+K04960+K08047+K02183+K05850+K05850+K02183+K04960+K08046+K13915+K08047+K02183+K05850+K02183+K02183+K05850+K05858+K04958+K13855+…
Organismal Systems	Nervous system	Cholinergic synapse	122	ko04725	Unigene002087;Unigene003470;Unigene004083;Unigene004980;Unigene008206;Unigene009023;Unigene009024;Unigene010073;Unigene010704;Unigene014202;Unigene014203;Unigene014406;Unigene016119;Unigene016120;Unigene016121;Unigene017320;Unigene017912;Unigene018352;Unigene018353;Unigene021233;Unigene021234;Unigene021802;Unigene021817;Unigene023086;Unigene023776;Unigene023951;Unigene027835;Unigene075189;Unigene…	K02677+K04345+K08043+K04345+K08046+K02833+K02833+K02677+K04635+K05703+K05703+K05858+K04634+K04634+K04634+K04515+K04374+K08043+K08043+K04371+K04371+K04960+K04456+K04630+K04456+K02677+K04537+K08046+K08047+K04960+K08047+K04960+K08046+K08047+K02649+K04542+K04630+K04928+K04539+K05858+K04958+K09048+K05858+K00922+K04371+K00922+K07826+K08043+K02649+K04630+K02677+K08049+K08049+K09047+K04958+K04958+K09048+…
Organismal Systems	Digestive system	Pancreatic secretion	121	ko04972	Unigene002087;Unigene004083;Unigene004564;Unigene008206;Unigene010073;Unigene010720;Unigene011863;Unigene014406;Unigene015492;Unigene015493;Unigene015869;Unigene016119;Unigene016120;Unigene016121;Unigene018352;Unigene018353;Unigene018802;Unigene021802;Unigene023951;Unigene025256;Unigene027404;Unigene033363;Unigene035730;Unigene037142;Unigene043562;Unigene050929;Unigene051448;Unigene052638;Unigene…	K02677+K08043+K05850+K08046+K02677+K05850+K13855+K05858+K04392+K04392+K05850+K04634+K04634+K04634+K08043+K08043+K01540+K04960+K02677+K05853+K05850+K05850+K05853+K01539+K04632+K14075+K01312+K05027+K01312+K05027+K05028+K05027+K05030+K08046+K08047+K04960+K05853+K08047+K05850+K05850+K04513+K04960+K08046+K08047+K05850+K14077+K05850+K05858+K01312+K04964+K04958+K13855+K05858+K10951+K05850+K08043+K02677+…
Organismal Systems	Endocrine system	Aldosterone synthesis and secretion	121	ko04925	Unigene001064;Unigene001065;Unigene001066;Unigene001618;Unigene002087;Unigene003470;Unigene004083;Unigene004980;Unigene005148;Unigene007191;Unigene008206;Unigene010073;Unigene010704;Unigene013015;Unigene013016;Unigene014287;Unigene014406;Unigene015251;Unigene016119;Unigene016120;Unigene016121;Unigene017320;Unigene017912;Unigene018352;Unigene018353;Unigene018826;Unigene021802;Unigene023951;Unigene…	K04855+K04855+K04855+K04166+K02677+K04345+K08043+K04345+K16056+K02183+K08046+K02677+K04635+K06070+K06070+K04450+K05858+K04166+K04634+K04634+K04634+K04515+K04374+K08043+K08043+K06070+K04960+K02677+K02183+K02183+K02183+K02183+K12473+K02183+K02183+K04632+K13885+K12473+K08046+K16056+K08047+K04960+K08047+K02183+K04855+K04855+K02183+K04960+K08046+K09049+K08047+K02183+K04855+K02183+K02183+K05858+K04855+…
Human Diseases	Cancers	Renal cell carcinoma	118	ko05211	Unigene000858;Unigene000859;Unigene001401;Unigene002509;Unigene002577;Unigene003046;Unigene003047;Unigene003406;Unigene003407;Unigene007557;Unigene007558;Unigene009023;Unigene009024;Unigene010124;Unigene013096;Unigene015072;Unigene015492;Unigene015493;Unigene017009;Unigene017010;Unigene017213;Unigene021233;Unigene021234;Unigene021817;Unigene021843;Unigene022602;Unigene022603;Unigene023776;Unigene…	K04438+K04438+K03868+K06277+K09097+K09592+K09592+K04364+K04364+K09592+K09592+K02833+K02833+K07299+K03870+K07293+K04392+K04392+K05734+K05734+K03871+K04371+K04371+K04456+K13375+K04366+K04366+K04456+K04369+K08268+K05099+K05733+K03870+K08845+K04498+K04498+K05734+K06277+K02649+K04498+K09095+K05448+K04498+K05734+K00922+K04371+K00922+K02649+K05099+K09594+K04498+K05448+K08845+K00922+K04456+K07828+K03873+…
Human Diseases	Cancers	Pancreatic cancer	118	ko05212	Unigene001080;Unigene001081;Unigene001499;Unigene002381;Unigene002526;Unigene006566;Unigene006567;Unigene008115;Unigene010736;Unigene012669;Unigene014592;Unigene015492;Unigene015493;Unigene019038;Unigene020539;Unigene021233;Unigene021234;Unigene021817;Unigene021843;Unigene022602;Unigene022603;Unigene022728;Unigene023776;Unigene026897;Unigene030758;Unigene074865;Unigene075438;Unigene079285;Unigene…	K05729+K05729+K04361+K04440+K04388+K11220+K11220+K07860+K08732+K17454+K02580+K04392+K04392+K07210+K02089+K04371+K04371+K04456+K13375+K04366+K04366+K04500+K04456+K04570+K11217+K08773+K08845+K07861+K17454+K08732+K04388+K05729+K04692+K07834+K04451+K07861+K02649+K04501+K04361+K04503+K05448+K06618+K04482+K11220+K00922+K04371+K00922+K02649+K05083+K05448+K04361+K08845+K00922+K05729+K04456+K11220+K07209+…
Human Diseases	Cancers	Glioma	118	ko05214	Unigene001499;Unigene002087;Unigene003406;Unigene003407;Unigene007191;Unigene009023;Unigene009024;Unigene010073;Unigene012669;Unigene017320;Unigene017944;Unigene020539;Unigene021233;Unigene021234;Unigene021817;Unigene022602;Unigene022603;Unigene023776;Unigene023951;Unigene025014;Unigene025410;Unigene026843;Unigene026844;Unigene027535;Unigene027892;Unigene042431;Unigene042432;Unigene075105;Unigene…	K04361+K02677+K04364+K04364+K02183+K02833+K02833+K02677+K17454+K04515+K01110+K02089+K04371+K04371+K04456+K04366+K04366+K04456+K02677+K02183+K02183+K02183+K02183+K06279+K04369+K02183+K02183+K07203+K08845+K02183+K07203+K17454+K02183+K04451+K07203+K02183+K02649+K04361+K04503+K02183+K05087+K02183+K05087+K06618+K07203+K00922+K04371+K00922+K06643+K02649+K02677+K01116+K04361+K02183+K08845+K07203+K00922+…
Environmental Information Processing	Signaling molecules and interaction	Cell adhesion molecules (CAMs)	118	ko04514	Unigene000029;Unigene006790;Unigene007145;Unigene007622;Unigene010689;Unigene011829;Unigene012414;Unigene012415;Unigene013552;Unigene013924;Unigene013925;Unigene014198;Unigene020746;Unigene021601;Unigene023535;Unigene023536;Unigene023837;Unigene026354;Unigene029971;Unigene030663;Unigene031911;Unigene031912;Unigene038017;Unigene038437;Unigene038524;Unigene038905;Unigene041368;Unigene041727;Unigene…	K05695+K06531+K06495+K16338+K06471+K06752+K06483+K06483+K06752+K06478+K06478+K06751+K06793+K06087+K06539+K06539+K05695+K06257+K06752+K06487+K06520+K06520+K06547+K05719+K06766+K06756+K06485+K06752+K10785+K10785+K06793+K06793+K06746+K06746+K06478+K06478+K06491+K06751+K06751+K06751+K06751+K06487+K06531+K06464+K06483+K06492+K06089+K06467+K06592+K06793+K06471+K06483+K05718+K06478+K06766+K06087+K06816+…
Organismal Systems	Endocrine system	Adipocytokine signaling pathway	117	ko04920	Unigene002381;Unigene003503;Unigene003853;Unigene010124;Unigene014592;Unigene015072;Unigene016515;Unigene018417;Unigene019038;Unigene021817;Unigene022219;Unigene022590;Unigene023776;Unigene029904;Unigene032525;Unigene036238;Unigene038880;Unigene045223;Unigene045224;Unigene058678;Unigene058679;Unigene060897;Unigene074295;Unigene075105;Unigene078787;Unigene079310;Unigene081513;Unigene082262;Unigene…	K04440+K07199+K07297+K07299+K02580+K07293+K08765+K01897+K07210+K04456+K07299+K01897+K04456+K01897+K01897+K03158+K07200+K04734+K04734+K15013+K15013+K01084+K01897+K07203+K02581+K07203+K01897+K08524+K04692+K07203+K07199+K07359+K08525+K07200+K01946+K07199+K01946+K16172+K01946+K07203+K07202+K01897+K01596+K06259+K01897+K07198+K06259+K07199+K08525+K16172+K01897+K07203+K01897+K04456+K04440+K07298+K07199+…
Cellular Processes	Transport and catabolism	Regulation of autophagy	116	ko04140	Unigene000484;Unigene000485;Unigene000717;Unigene000718;Unigene006757;Unigene006758;Unigene006996;Unigene006997;Unigene007632;Unigene007633;Unigene008455;Unigene008456;Unigene008751;Unigene008752;Unigene012231;Unigene012232;Unigene015740;Unigene020873;Unigene020874;Unigene020875;Unigene023737;Unigene024748;Unigene024749;Unigene024750;Unigene025212;Unigene025484;Unigene030827;Unigene032550;Unigene…	K08341+K08341+K08334+K08334+K08341+K08341+K07198+K07198+K08341+K08341+K07198+K07198+K08334+K08334+K00914+K00914+K08343+K08341+K08341+K08341+K08341+K08342+K08342+K08342+K07198+K07198+K08343+K08336+K08343+K08341+K17889+K08331+K17890+K08269+K08334+K07198+K08337+K08333+K17888+K08339+K00914+K08342+K08342+K08269+K08342+K08342+K07198+K08269+K08341+K07198+K07198+K08336+K07198+K08332+K08333+K08269+K08339+…
Genetic Information Processing	Folding, sorting and degradation	SNARE interactions in vesicular transport	115	ko04130	Unigene002785;Unigene002786;Unigene005529;Unigene006010;Unigene008222;Unigene009235;Unigene009622;Unigene009923;Unigene012331;Unigene012920;Unigene014373;Unigene015549;Unigene016706;Unigene016707;Unigene017504;Unigene017505;Unigene019533;Unigene019534;Unigene023217;Unigene024092;Unigene026551;Unigene026552;Unigene031045;Unigene033126;Unigene037068;Unigene037069;Unigene040524;Unigene042796;Unigene…	K08515+K08515+K08512+K08493+K08491+K08516+K08493+K08515+K08486+K08510+K08501+K08516+K08493+K08493+K08496+K08496+K08489+K08489+K08501+K08517+K08501+K08501+K08513+K08504+K08515+K08515+K08490+K08495+K04560+K08495+K08515+K08501+K08504+K13504+K08492+K08517+K08498+K08509+K08493+K08488+K04560+K08493+K08507+K08486+K13502+K08504+K08489+K08489+K08504+K08496+K13502+K08515+K08495+K08493+K04560+K08493+K08498+…
Human Diseases	Cancers	Colorectal cancer	114	ko05210	Unigene002381;Unigene002526;Unigene003120;Unigene004808;Unigene008115;Unigene010736;Unigene013102;Unigene015492;Unigene015493;Unigene015657;Unigene016506;Unigene018326;Unigene021233;Unigene021234;Unigene021627;Unigene021817;Unigene021843;Unigene022293;Unigene022602;Unigene022603;Unigene022728;Unigene022902;Unigene023776;Unigene026250;Unigene030119;Unigene032605;Unigene032606;Unigene037791;Unigene…	K04440+K04388+K02620+K08737+K07860+K08732+K02157+K04392+K04392+K02620+K04492+K08738+K04371+K04371+K02157+K04456+K13375+K08731+K04366+K04366+K04500+K04377+K04456+K02159+K03083+K04492+K04492+K08738+K02105+K08736+K08734+K08738+K08738+K08845+K02620+K07861+K08736+K08732+K04388+K04513+K04451+K02157+K08734+K03083+K07861+K02649+K04501+K02085+K04503+K02620+K00922+K04371+K00922+K02085+K02649+K03083+K04385+…
Genetic Information Processing	Folding, sorting and degradation	Protein export	113	ko03060	Unigene001308;Unigene004495;Unigene005374;Unigene007111;Unigene009317;Unigene009352;Unigene009681;Unigene009893;Unigene013274;Unigene015033;Unigene016316;Unigene018143;Unigene018264;Unigene018265;Unigene018463;Unigene018506;Unigene018592;Unigene020556;Unigene020557;Unigene021600;Unigene022269;Unigene022790;Unigene022819;Unigene022930;Unigene023762;Unigene026270;Unigene026271;Unigene031191;Unigene…	K09490+K09481+K09540+K09481+K12948+K10956+K13280+K09647+K12946+K10956+K09481+K09490+K13431+K13431+K09647+K03104+K03104+K03217+K03217+K13280+K09481+K09481+K09481+K12272+K09490+K13431+K13431+K03108+K03105+K03108+K03107+K07342+K10956+K10956+K10956+K03105+K10956+K13431+K07342+K07342+K12946+K03109+K10956+K10956+K03107+K03107+K12947+K10956+K10956+K09647+K03109+K03106+K09481+K12275+K12948+K09540+K07342+…
Organismal Systems	Immune system	B cell receptor signaling pathway	113	ko04662	Unigene000938;Unigene003406;Unigene003407;Unigene008115;Unigene009023;Unigene009024;Unigene009318;Unigene011019;Unigene013874;Unigene014592;Unigene015389;Unigene015492;Unigene015493;Unigene019038;Unigene021233;Unigene021234;Unigene021817;Unigene022602;Unigene022603;Unigene023658;Unigene023659;Unigene023660;Unigene023776;Unigene027892;Unigene030119;Unigene032616;Unigene036665;Unigene045223;Unigene…	K15909+K04364+K04364+K07860+K02833+K02833+K06268+K15909+K05730+K02580+K06856+K04392+K04392+K07210+K04371+K04371+K04456+K04366+K04366+K17333+K17333+K17333+K04456+K04369+K03083+K05854+K06856+K04734+K04734+K02581+K07861+K06467+K06856+K03083+K07367+K07861+K02649+K17333+K06856+K07367+K00922+K04371+K00922+K07367+K02649+K04348+K17333+K07368+K03083+K03084+K07367+K00922+K04456+K07828+K07209+K03083+K07209+…
Organismal Systems	Nervous system	Long-term potentiation	112	ko04720	Unigene002087;Unigene003470;Unigene004980;Unigene006863;Unigene007191;Unigene009023;Unigene009024;Unigene009318;Unigene010073;Unigene014406;Unigene016119;Unigene016120;Unigene016121;Unigene017320;Unigene017912;Unigene021233;Unigene021234;Unigene021802;Unigene022602;Unigene022603;Unigene023951;Unigene025014;Unigene025410;Unigene026843;Unigene026844;Unigene027892;Unigene031280;Unigene031281;Unigene…	K02677+K04345+K04345+K06269+K02183+K02833+K02833+K06268+K02677+K05858+K04634+K04634+K04634+K04515+K04374+K04371+K04371+K04960+K04366+K04366+K02677+K02183+K02183+K02183+K02183+K04369+K04373+K04373+K06269+K02183+K02183+K08845+K04960+K02183+K04498+K02183+K04960+K04498+K02183+K04498+K02183+K02183+K04498+K05858+K04958+K06269+K05858+K04371+K04348+K02677+K04373+K04498+K02183+K08845+K04958+K04958+K04634+…
Metabolism	Metabolism of other amino acids	beta-Alanine metabolism	111	ko00410	Unigene003683;Unigene004079;Unigene004327;Unigene006254;Unigene007479;Unigene008680;Unigene009817;Unigene014232;Unigene014233;Unigene016705;Unigene016871;Unigene017710;Unigene017711;Unigene020774;Unigene021474;Unigene024037;Unigene027566;Unigene027745;Unigene028513;Unigene028760;Unigene032093;Unigene033334;Unigene033915;Unigene033916;Unigene039495;Unigene041288;Unigene048456;Unigene049626;Unigene…	K00249+K00797+K07511+K00129+K14085+K07511+K00802+K00797+K00797+K00128+K00797+K00140+K00140+K00128+K00128+K01580+K01580+K08660+K05605+K00128+K01580+K00128+K05605+K05605+K01578+K00129+K00140+K13524+K13524+K01431+K01431+K00802+K00207+K05605+K05605+K00128+K01464+K07511+K14085+K08660+K08660+K07515+K01580+K00128+K00797+K00797+K00149+K00128+K00128+K00249+K00249+K00128+K00129+K00129+K07514+K00129+K00207+…
Human Diseases	Infectious diseases	Legionellosis	110	ko05134	Unigene000325;Unigene000907;Unigene001517;Unigene001691;Unigene002212;Unigene002233;Unigene002965;Unigene002966;Unigene004516;Unigene007548;Unigene009261;Unigene011119;Unigene011364;Unigene014088;Unigene014592;Unigene018326;Unigene022274;Unigene024092;Unigene032940;Unigene033111;Unigene035801;Unigene037265;Unigene037791;Unigene039540;Unigene040139;Unigene040180;Unigene042421;Unigene044694;Unigene…	K07874+K03283+K03283+K04519+K03233+K07875+K04469+K04469+K03283+K07953+K15464+K03283+K09414+K04077+K02580+K08738+K13525+K08517+K03231+K03231+K03283+K08823+K08738+K03283+K03283+K07937+K09414+K09414+K09414+K04734+K04734+K03231+K03231+K03283+K03283+K03283+K03283+K03283+K03283+K03283+K08738+K08738+K04469+K06464+K04398+K12807+K07953+K09414+K03233+K14416+K04729+K04391+K12807+K09414+K12799+K03233+K15464+…
Environmental Information Processing	Signaling molecules and interaction	Neuroactive ligand-receptor interaction	109	ko04080	Unigene001092;Unigene001618;Unigene005496;Unigene005497;Unigene006311;Unigene007185;Unigene008154;Unigene008649;Unigene009182;Unigene011210;Unigene012185;Unigene012524;Unigene013845;Unigene015251;Unigene015697;Unigene015908;Unigene017267;Unigene017994;Unigene023661;Unigene026575;Unigene026576;Unigene029187;Unigene030852;Unigene035522;Unigene036218;Unigene039443;Unigene039753;Unigene043317;Unigene…	K05192+K04166+K04237+K04237+K05202+K04237+K05196+K05202+K05223+K05175+K05193+K05175+K05771+K04166+K05196+K04578+K01312+K05210+K04237+K05770+K05770+K05202+K04306+K04237+K05195+K05195+K05175+K04136+K05202+K05202+K05207+K08362+K05770+K05770+K04266+K04208+K01312+K04605+K04269+K01312+K01312+K01312+K04160+K04306+K04153+K04615+K04615+K04261+K04261+K05202+K05202+K05202+K04604+K04577+K05249+K04288+K04291+…
Organismal Systems	Environmental adaptation	Circadian entrainment	107	ko04713	Unigene001064;Unigene001065;Unigene001066;Unigene002087;Unigene003470;Unigene004083;Unigene004980;Unigene007191;Unigene008206;Unigene010073;Unigene014406;Unigene016119;Unigene016120;Unigene016121;Unigene017320;Unigene018352;Unigene018353;Unigene021233;Unigene021234;Unigene021802;Unigene023086;Unigene023951;Unigene025014;Unigene025410;Unigene026843;Unigene026844;Unigene027835;Unigene042431;Unigene…	K04855+K04855+K04855+K02677+K04345+K08043+K04345+K02183+K08046+K02677+K05858+K04634+K04634+K04634+K04515+K08043+K08043+K04371+K04371+K04960+K04630+K02677+K02183+K02183+K02183+K02183+K04537+K02183+K02183+K04632+K08046+K08047+K04960+K02633+K08047+K02183+K07843+K04855+K04855+K02183+K04960+K08046+K08047+K02183+K04855+K04542+K02183+K02183+K04630+K04539+K05858+K04855+K04958+K05858+K04371+K07826+K08043+…
Organismal Systems	Endocrine system	Thyroid hormone synthesis	105	ko04918	Unigene001107;Unigene001308;Unigene002087;Unigene003470;Unigene004083;Unigene004980;Unigene008206;Unigene008329;Unigene010073;Unigene014097;Unigene014098;Unigene014287;Unigene014406;Unigene016119;Unigene016120;Unigene016121;Unigene017912;Unigene018143;Unigene018352;Unigene018353;Unigene018802;Unigene020250;Unigene021802;Unigene022743;Unigene023951;Unigene027349;Unigene032042;Unigene037142;Unigene…	K08054+K09490+K02677+K04345+K08043+K04345+K08046+K08054+K02677+K00432+K00432+K04450+K05858+K04634+K04634+K04634+K04374+K09490+K08043+K08043+K01540+K09582+K04960+K15225+K02677+K00383+K09487+K01539+K17231+K04632+K08054+K06233+K08046+K15173+K08047+K04960+K08047+K15173+K04960+K08046+K09049+K08047+K15173+K05858+K17231+K04958+K09048+K05858+K08043+K02677+K08049+K01540+K01539+K08049+K09047+K04958+K04958+…
Organismal Systems	Endocrine system	PPAR signaling pathway	103	ko03320	Unigene000989;Unigene002132;Unigene003683;Unigene005772;Unigene006099;Unigene006100;Unigene006272;Unigene006273;Unigene008580;Unigene008581;Unigene009740;Unigene016515;Unigene018417;Unigene022590;Unigene023089;Unigene029488;Unigene029904;Unigene032525;Unigene036957;Unigene044552;Unigene045428;Unigene045590;Unigene046526;Unigene047282;Unigene047284;Unigene047285;Unigene047713;Unigene047714;Unigene…	K00029+K07513+K00249+K08770+K06276+K06276+K00864+K00864+K00232+K00232+K08530+K08765+K01897+K01897+K06272+K07513+K01897+K01897+K10226+K08770+K08766+K00507+K08762+K08770+K08770+K08770+K00232+K00232+K00232+K08770+K00489+K15013+K15013+K08745+K00249+K00255+K00255+K01897+K07514+K08745+K07425+K01897+K08524+K00232+K08764+K08525+K00232+K07513+K07513+K08766+K00488+K01897+K01596+K06259+K01897+K06259+K06276+…
Human Diseases	Cancers	Endometrial cancer	103	ko05213	Unigene001499;Unigene003120;Unigene003406;Unigene003407;Unigene006099;Unigene006100;Unigene009023;Unigene009024;Unigene013102;Unigene015657;Unigene016506;Unigene017944;Unigene021233;Unigene021234;Unigene021627;Unigene021817;Unigene022602;Unigene022603;Unigene022902;Unigene023089;Unigene023776;Unigene026347;Unigene027892;Unigene030119;Unigene032445;Unigene032605;Unigene032606;Unigene040758;Unigene…	K04361+K02620+K04364+K04364+K06276+K06276+K02833+K02833+K02157+K02620+K04492+K01110+K04371+K04371+K02157+K04456+K04366+K04366+K04377+K06272+K04456+K05691+K04369+K03083+K09408+K04492+K04492+K02105+K08734+K04375+K08845+K02620+K04451+K02157+K08734+K03083+K02649+K02085+K04361+K04503+K02620+K09408+K04375+K00922+K04371+K00922+K02085+K02649+K05083+K06276+K03083+K04385+K04361+K08845+K00922+K04456+K07828+…
Organismal Systems	Development	Dorso-ventral axis formation	102	ko04320	Unigene001499;Unigene003406;Unigene003407;Unigene006634;Unigene006960;Unigene012433;Unigene013319;Unigene013771;Unigene021233;Unigene021234;Unigene023161;Unigene026905;Unigene032778;Unigene034177;Unigene043442;Unigene043650;Unigene045150;Unigene045151;Unigene045152;Unigene045714;Unigene046374;Unigene046946;Unigene048771;Unigene048928;Unigene050805;Unigene051857;Unigene053451;Unigene056275;Unigene…	K04361+K04364+K04364+K02174+K04368+K04361+K04368+K02678+K04371+K04371+K04361+K04361+K04361+K07827+K03211+K02174+K02602+K02602+K02602+K04371+K02599+K03099+K02359+K02174+K04364+K03102+K02174+K02174+K02644+K04368+K02174+K03102+K02156+K02174+K02599+K02174+K02599+K04361+K04368+K02678+K04361+K02599+K03211+K03102+K04371+K02678+K02174+K04371+K04371+K02599+K02599+K04371+K04361+K02599+K03211+K02599+K02599+…
Organismal Systems	Endocrine system	Renin secretion	102	ko04924	Unigene001618;Unigene002420;Unigene003470;Unigene004980;Unigene005148;Unigene006470;Unigene007191;Unigene008206;Unigene009075;Unigene009318;Unigene013585;Unigene014406;Unigene015251;Unigene016119;Unigene016120;Unigene016121;Unigene018305;Unigene021802;Unigene022657;Unigene023086;Unigene025014;Unigene025410;Unigene026843;Unigene026844;Unigene039473;Unigene042431;Unigene042432;Unigene043509;Unigene…	K04166+K13296+K04345+K04345+K16056+K09864+K02183+K08046+K01363+K06268+K09864+K05858+K04166+K04634+K04634+K04634+K01363+K04960+K09864+K04630+K02183+K02183+K02183+K02183+K09864+K02183+K02183+K09864+K04632+K09864+K09864+K09864+K09864+K09864+K09864+K09864+K09864+K01363+K05027+K09864+K05027+K05028+K05027+K05030+K08046+K16056+K04960+K02183+K13296+K02183+K04960+K09864+K08046+K02183+K02183+K02183+K04630+…
Organismal Systems	Immune system	NOD-like receptor signaling pathway	102	ko04621	Unigene001691;Unigene002381;Unigene003176;Unigene009498;Unigene010060;Unigene010061;Unigene010348;Unigene013683;Unigene014592;Unigene016357;Unigene016481;Unigene017712;Unigene017713;Unigene018474;Unigene019038;Unigene021233;Unigene021234;Unigene022953;Unigene024064;Unigene026509;Unigene029603;Unigene029604;Unigene029605;Unigene029655;Unigene029656;Unigene029657;Unigene029658;Unigene032042;Unigene…	K04519+K04440+K04441+K09487+K12793+K12793+K04404+K16060+K02580+K16060+K12792+K04441+K04441+K11859+K07210+K04371+K04371+K12795+K09487+K16060+K04079+K04079+K04079+K12796+K12796+K12796+K12796+K09487+K04079+K11859+K11859+K11859+K04734+K04734+K04398+K04079+K12805+K12795+K12800+K12800+K04398+K12800+K04398+K08846+K08846+K02581+K04398+K12807+K03175+K04441+K12803+K12807+K12800+K04441+K12799+K04371+K09487+…
Genetic Information Processing	Replication and repair	Homologous recombination	99	ko03440	Unigene000116;Unigene001504;Unigene001505;Unigene004922;Unigene005145;Unigene006241;Unigene008429;Unigene009345;Unigene009386;Unigene009387;Unigene015103;Unigene016445;Unigene016821;Unigene019424;Unigene026707;Unigene032638;Unigene032639;Unigene035463;Unigene039057;Unigene039844;Unigene041169;Unigene042475;Unigene044324;Unigene044325;Unigene046174;Unigene046300;Unigene046800;Unigene046801;Unigene…	K10877+K03165+K03165+K02327+K10880+K02327+K10740+K07466+K08991+K08991+K02327+K10901+K10865+K02328+K10870+K03111+K03111+K10870+K10867+K10880+K10881+K10870+K10866+K10866+K10879+K10877+K08991+K08991+K08775+K08775+K02328+K10740+K10882+K03111+K10873+K10739+K03504+K10869+K10871+K10875+K10867+K10865+K10865+K04482+K03165+K03165+K07466+K03165+K10901+K02327+K02327+K03505+K10877+K10875+K10875+K10877+K02327+…
Organismal Systems	Immune system	Cytosolic DNA-sensing pathway	99	ko04623	Unigene001324;Unigene001691;Unigene005830;Unigene010262;Unigene011092;Unigene011448;Unigene012168;Unigene014592;Unigene016477;Unigene019038;Unigene025719;Unigene028576;Unigene030442;Unigene032617;Unigene032618;Unigene035713;Unigene035714;Unigene036555;Unigene036874;Unigene040789;Unigene040790;Unigene042823;Unigene044733;Unigene045223;Unigene045224;Unigene051083;Unigene053024;Unigene053026;Unigene…	K05411+K04519+K03019+K02861+K08847+K05410+K03007+K02580+K03013+K07210+K03019+K03027+K03007+K03016+K03016+K05411+K05411+K03023+K03022+K12968+K12968+K14721+K03020+K04734+K04734+K03025+K03007+K03007+K03027+K03014+K03026+K03018+K03021+K03016+K02581+K03025+K12648+K03018+K03022+K03027+K03018+K03024+K03018+K03021+K03021+K03023+K14721+K03026+K12799+K03021+K03021+K03021+K05410+K08847+K03009+K17834+K03007+…
Human Diseases	Cancers	Acute myeloid leukemia	98	ko05221	Unigene003120;Unigene003406;Unigene003407;Unigene009023;Unigene009024;Unigene011738;Unigene014592;Unigene015657;Unigene016506;Unigene019038;Unigene021233;Unigene021234;Unigene021817;Unigene022602;Unigene022603;Unigene022902;Unigene023776;Unigene027892;Unigene031380;Unigene032605;Unigene032606;Unigene045434;Unigene050606;Unigene074529;Unigene075105;Unigene075438;Unigene076444;Unigene077537;Unigene…	K02620+K04364+K04364+K02833+K02833+K08806+K02580+K02620+K04492+K07210+K04371+K04371+K04456+K04366+K04366+K04377+K04456+K04369+K08527+K04492+K04492+K10056+K04702+K04688+K07203+K08845+K02620+K11224+K07203+K04692+K07203+K02649+K04503+K02620+K07203+K00922+K04371+K00922+K02649+K11224+K04702+K08845+K07203+K04688+K09055+K00922+K04456+K04688+K07828+K07209+K04365+K07209+K08845+K07205+K03099+K00922+K04735+…
Organismal Systems	Digestive system	Gastric acid secretion	98	ko04971	Unigene002087;Unigene003470;Unigene004083;Unigene004980;Unigene007191;Unigene008206;Unigene010073;Unigene011863;Unigene014406;Unigene016119;Unigene016120;Unigene016121;Unigene017320;Unigene018352;Unigene018353;Unigene018802;Unigene021802;Unigene023086;Unigene023951;Unigene025014;Unigene025410;Unigene026843;Unigene026844;Unigene028794;Unigene033972;Unigene037142;Unigene042431;Unigene042432;Unigene…	K02677+K04345+K08043+K04345+K02183+K08046+K02677+K13855+K05858+K04634+K04634+K04634+K04515+K08043+K08043+K01540+K04960+K04630+K02677+K02183+K02183+K02183+K02183+K08007+K08007+K01539+K02183+K02183+K04632+K08046+K08047+K04960+K08047+K02183+K02183+K04960+K08046+K08047+K02183+K02183+K02183+K04630+K05858+K04958+K13855+K05858+K08043+K04630+K02677+K08049+K01540+K01539+K08049+K02183+K04958+K04958+K04634+…
Metabolism	Carbohydrate metabolism	Ascorbate and aldarate metabolism	98	ko00053	Unigene007479;Unigene016705;Unigene017494;Unigene017765;Unigene019203;Unigene019490;Unigene020774;Unigene021291;Unigene021292;Unigene021474;Unigene021527;Unigene023099;Unigene023889;Unigene024125;Unigene028760;Unigene031760;Unigene033334;Unigene033520;Unigene035777;Unigene035778;Unigene035779;Unigene035780;Unigene038811;Unigene040567;Unigene047547;Unigene048287;Unigene049163;Unigene054072;Unigene…	K14085+K00128+K00699+K00699+K00699+K00699+K00128+K00699+K00699+K00128+K00699+K00699+K00699+K00699+K00128+K00699+K00128+K00699+K00699+K00699+K00699+K00699+K00012+K00699+K00699+K00699+K01053+K00699+K00128+K01053+K14085+K01053+K00012+K00128+K16190+K00149+K00128+K00128+K00699+K00128+K00012+K16190+K00699+K00128+K00699+K00128+K00699+K00469+K00699+K00128+K00699+K00128+K00128+K00128+K00699+K00128+K00699+…
Human Diseases	Immune diseases	Systemic lupus erythematosus	98	ko05322	Unigene001106;Unigene001952;Unigene005527;Unigene007684;Unigene011162;Unigene011739;Unigene011829;Unigene011873;Unigene013552;Unigene014291;Unigene014493;Unigene015389;Unigene020516;Unigene021174;Unigene022325;Unigene024607;Unigene025221;Unigene028024;Unigene028026;Unigene028463;Unigene029971;Unigene030191;Unigene031458;Unigene031459;Unigene031984;Unigene034447;Unigene035997;Unigene036665;Unigene…	K11086+K06472+K05699+K11254+K05699+K11254+K06752+K11254+K06752+K11254+K11251+K06856+K11254+K11090+K11253+K11253+K11251+K11251+K11251+K11252+K06752+K11253+K11253+K11253+K05699+K11254+K11253+K06856+K11253+K11253+K05699+K05699+K11251+K11251+K06752+K10785+K10785+K11252+K11252+K11253+K11254+K11254+K11254+K11251+K11251+K11251+K11251+K11251+K11251+K11251+K11251+K11251+K11251+K11251+K11253+K11252+K11252+…
Human Diseases	Cancers	Central carbon metabolism in cancer	98	ko05230	Unigene001499;Unigene002245;Unigene002281;Unigene004036;Unigene006200;Unigene007736;Unigene009023;Unigene009024;Unigene010124;Unigene010837;Unigene012130;Unigene017944;Unigene019398;Unigene021127;Unigene021233;Unigene021234;Unigene021817;Unigene022602;Unigene022603;Unigene022902;Unigene023776;Unigene027892;Unigene035138;Unigene041527;Unigene049878;Unigene051635;Unigene051652;Unigene054538;Unigene…	K04361+K00850+K08180+K00844+K00844+K00161+K02833+K02833+K07299+K00873+K00844+K01110+K00844+K00036+K04371+K04371+K04456+K04366+K04366+K04377+K04456+K04369+K00850+K08268+K00844+K05616+K05099+K13780+K00850+K07203+K11413+K07203+K04451+K07203+K00844+K00844+K02649+K00873+K04361+K11416+K00850+K01425+K00850+K07203+K07152+K00922+K04371+K00922+K02649+K05083+K00850+K05099+K14634+K12077+K04361+K07203+K05094+…
Organismal Systems	Nervous system	Glutamatergic synapse	97	ko04724	Unigene002087;Unigene003470;Unigene004083;Unigene004980;Unigene008206;Unigene009318;Unigene010073;Unigene014406;Unigene016119;Unigene016120;Unigene016121;Unigene018352;Unigene018353;Unigene021233;Unigene021234;Unigene021802;Unigene023086;Unigene023951;Unigene027835;Unigene043562;Unigene048810;Unigene055566;Unigene056701;Unigene059921;Unigene070244;Unigene075189;Unigene075511;Unigene075792;Unigene…	K02677+K04345+K08043+K04345+K08046+K06268+K02677+K05858+K04634+K04634+K04634+K08043+K08043+K04371+K04371+K04960+K04630+K02677+K04537+K04632+K14207+K14990+K01115+K01115+K01115+K08046+K08047+K04960+K08047+K15010+K04960+K08046+K08047+K04542+K04630+K05614+K04539+K05858+K01425+K00910+K04964+K04958+K05858+K04371+K07826+K08043+K04348+K04630+K02677+K08049+K08049+K13576+K04958+K04958+K04634+K00910+K04960+…
Human Diseases	Cardiovascular diseases	Dilated cardiomyopathy (DCM)	96	ko05414	Unigene003470;Unigene004083;Unigene004980;Unigene008206;Unigene012414;Unigene012415;Unigene013499;Unigene015389;Unigene016898;Unigene018352;Unigene018353;Unigene021843;Unigene024887;Unigene024888;Unigene025256;Unigene026253;Unigene028266;Unigene029105;Unigene029513;Unigene029538;Unigene030663;Unigene032105;Unigene033646;Unigene034072;Unigene036665;Unigene036840;Unigene038437;Unigene041368;Unigene…	K04345+K08043+K04345+K08046+K06483+K06483+K05692+K06856+K09290+K08043+K08043+K13375+K10374+K10374+K05853+K06525+K05692+K05692+K06588+K06265+K06487+K06482+K10373+K10375+K06856+K12641+K05719+K06485+K04632+K05692+K05692+K05692+K05692+K05692+K12314+K05692+K05692+K05692+K06525+K05692+K06484+K08046+K12569+K08047+K06587+K08047+K06483+K10373+K06856+K08046+K08047+K06483+K12566+K04864+K06856+K08043+K06483+…
Metabolism	Carbohydrate metabolism	Propanoate metabolism	96	ko00640	Unigene001447;Unigene003683;Unigene004327;Unigene005584;Unigene008680;Unigene015860;Unigene016264;Unigene017710;Unigene017711;Unigene026155;Unigene027484;Unigene027485;Unigene028513;Unigene032366;Unigene032367;Unigene033915;Unigene033916;Unigene039495;Unigene041803;Unigene041804;Unigene042149;Unigene045162;Unigene046998;Unigene047140;Unigene048456;Unigene048942;Unigene049626;Unigene049627;Unigene…	K11262+K00249+K07511+K01899+K07511+K11262+K00626+K00140+K00140+K00016+K18426+K18426+K05605+K01900+K01900+K05605+K05605+K01578+K01966+K01966+K18426+K01895+K00626+K05606+K00140+K00626+K13524+K13524+K01899+K05605+K05605+K01900+K07511+K11262+K01908+K07515+K00016+K00016+K01965+K01900+K01847+K00249+K00249+K00016+K01895+K01895+K07514+K01895+K00016+K01895+K01847+K01847+K01946+K05605+K11262+K11262+K01899+…
Human Diseases	Cancers	Non-small cell lung cancer	96	ko05223	Unigene001499;Unigene002087;Unigene003406;Unigene003407;Unigene006099;Unigene006100;Unigene006973;Unigene006974;Unigene009023;Unigene009024;Unigene010073;Unigene012669;Unigene020539;Unigene021233;Unigene021234;Unigene021817;Unigene022602;Unigene022603;Unigene023776;Unigene023951;Unigene027892;Unigene032445;Unigene075438;Unigene080124;Unigene082262;Unigene083523;Unigene083591;Unigene085183;Unigene…	K04361+K02677+K04364+K04364+K06276+K06276+K04411+K04411+K02833+K02833+K02677+K17454+K02089+K04371+K04371+K04456+K04366+K04366+K04456+K02677+K04369+K09408+K08845+K17454+K08524+K08528+K04451+K08525+K02649+K04361+K04503+K09408+K06618+K00922+K04371+K00922+K02649+K02677+K05083+K06276+K01116+K04361+K08525+K08845+K00922+K08015+K04456+K07828+K04365+K04361+K08845+K05083+K03099+K01116+K00922+K15420+K01116+…
Organismal Systems	Immune system	Fc epsilon RI signaling pathway	95	ko04664	Unigene002381;Unigene003176;Unigene003406;Unigene003407;Unigene006099;Unigene006100;Unigene008115;Unigene009023;Unigene009024;Unigene013874;Unigene014202;Unigene014203;Unigene015389;Unigene015492;Unigene015493;Unigene016661;Unigene017712;Unigene017713;Unigene021233;Unigene021234;Unigene021817;Unigene022602;Unigene022603;Unigene023776;Unigene023951;Unigene027892;Unigene032616;Unigene036665;Unigene…	K04440+K04441+K04364+K04364+K06276+K06276+K07860+K02833+K02833+K05730+K05703+K05703+K06856+K04392+K04392+K07362+K04441+K04441+K04371+K04371+K04456+K04366+K04366+K04456+K02677+K04369+K05854+K06856+K07861+K06856+K07861+K02649+K04432+K04441+K07983+K04432+K06856+K04441+K00922+K04371+K00922+K02649+K04431+K07361+K07361+K06276+K01116+K03084+K07361+K00922+K04456+K07828+K05703+K03099+K01116+K00922+K04433+…
Metabolism	Global and Overview	2-Oxocarboxylic acid metabolism	93	ko01210	Unigene000801;Unigene001457;Unigene003894;Unigene003895;Unigene005870;Unigene010312;Unigene011086;Unigene012776;Unigene015481;Unigene017485;Unigene018569;Unigene021461;Unigene024874;Unigene027592;Unigene033564;Unigene037083;Unigene038518;Unigene038519;Unigene044248;Unigene046602;Unigene047549;Unigene053382;Unigene053394;Unigene053659;Unigene054880;Unigene055214;Unigene059567;Unigene059568;Unigene…	K14677+K00814+K00031+K00031+K14455+K00030+K00814+K01681+K14455+K00826+K14455+K01647+K01647+K00030+K00825+K00814+K00826+K00826+K00030+K00825+K00030+K00825+K01647+K00825+K14455+K00030+K14677+K14677+K14677+K01681+K00031+K00031+K01681+K00814+K14454+K01681+K01702+K00826+K00031+K01681+K01647+K01681+K01681+K00030+K01681+K00031+K01681+K14677+K01681+K01681+K00030+K00814+K00031+K00030+K01681+K14454+K00030+…
Environmental Information Processing	Signal transduction	Hedgehog signaling pathway	92	ko04340	Unigene000603;Unigene000604;Unigene002752;Unigene003470;Unigene004980;Unigene006530;Unigene006537;Unigene013057;Unigene013058;Unigene019315;Unigene020238;Unigene024021;Unigene025013;Unigene028417;Unigene029252;Unigene030119;Unigene030120;Unigene030121;Unigene030546;Unigene035819;Unigene045710;Unigene053605;Unigene055269;Unigene056450;Unigene060144;Unigene065659;Unigene069959;Unigene069960;Unigene…	K08958+K08958+K06233+K04345+K04345+K06233+K06234+K08960+K08960+K08959+K01558+K08960+K03083+K08957+K03083+K03083+K03083+K03083+K08957+K08957+K06233+K03362+K08960+K06226+K06228+K08958+K06229+K06229+K06233+K00444+K04662+K06228+K08959+K03083+K08960+K06233+K08959+K03083+K03083+K03083+K08960+K03083+K08959+K03083+K03362+K08960+K06233+K08959+K03083+K00312+K08957+K06233+K06234+K03083+K08958+K06233+K08958+…
Metabolism	Lipid metabolism	Arachidonic acid metabolism	91	ko00590	Unigene001878;Unigene001879;Unigene001880;Unigene003731;Unigene003983;Unigene010781;Unigene014097;Unigene014098;Unigene026794;Unigene027106;Unigene027107;Unigene029685;Unigene030579;Unigene032653;Unigene032730;Unigene032731;Unigene034183;Unigene035442;Unigene036523;Unigene038432;Unigene041517;Unigene042809;Unigene043286;Unigene043332;Unigene044002;Unigene044003;Unigene044820;Unigene047861;Unigene…	K00079+K00079+K00079+K00079+K07422+K15717+K00432+K00432+K00079+K00432+K00432+K15730+K00432+K00432+K15730+K15730+K15729+K15717+K00432+K00461+K15730+K17726+K00432+K00079+K01047+K01047+K01830+K01047+K05309+K04119+K00461+K07422+K01830+K01047+K00079+K07422+K16343+K18592+K00079+K16343+K01047+K01047+K01047+K00432+K16342+K01254+K00461+K00432+K07425+K01832+K08726+K00461+K00509+K00432+K00084+K08726+K15717+…
Organismal Systems	Endocrine system	Prolactin signaling pathway	90	ko04917	Unigene002381;Unigene003176;Unigene003406;Unigene003407;Unigene006566;Unigene006567;Unigene007454;Unigene009023;Unigene009024;Unigene014592;Unigene016607;Unigene017712;Unigene017713;Unigene021233;Unigene021234;Unigene021817;Unigene022602;Unigene022603;Unigene023776;Unigene027535;Unigene027892;Unigene030119;Unigene032445;Unigene077537;Unigene083013;Unigene083636;Unigene084666;Unigene085932;Unigene…	K04440+K04441+K04364+K04364+K11220+K11220+K00512+K02833+K02833+K02580+K05704+K04441+K04441+K04371+K04371+K04456+K04366+K04366+K04456+K06279+K04369+K03083+K09408+K11224+K04692+K05704+K03083+K02649+K05704+K04503+K04441+K00512+K09408+K04441+K11220+K00922+K04371+K00922+K02649+K11224+K04698+K03083+K00501+K00922+K04456+K11220+K07828+K03083+K03099+K00922+K04735+K02580+K04379+K03099+K07827+K04371+K02649+…
Environmental Information Processing	Signal transduction	VEGF signaling pathway	90	ko04370	Unigene002087;Unigene003176;Unigene008115;Unigene008157;Unigene008297;Unigene009023;Unigene009024;Unigene009318;Unigene010073;Unigene015492;Unigene015493;Unigene016607;Unigene017712;Unigene017713;Unigene021233;Unigene021234;Unigene021817;Unigene022602;Unigene022603;Unigene023023;Unigene023024;Unigene023776;Unigene023951;Unigene025096;Unigene027390;Unigene027892;Unigene031028;Unigene031029;Unigene…	K02677+K04441+K07860+K04455+K04393+K02833+K02833+K06268+K02677+K04392+K04392+K05704+K04441+K04441+K04371+K04371+K04456+K04366+K04366+K04443+K04444+K04456+K02677+K04348+K05760+K04369+K05760+K05760+K00922+K05725+K07860+K07861+K05704+K07861+K02649+K05725+K05725+K05704+K04441+K05448+K05725+K04718+K05098+K04441+K00922+K04371+K00922+K02649+K04348+K02677+K04371+K01116+K05448+K04371+K04718+K00922+K04456+…
Organismal Systems	Immune system	RIG-I-like receptor signaling pathway	90	ko04622	Unigene000508;Unigene001324;Unigene001432;Unigene002381;Unigene003176;Unigene009757;Unigene010245;Unigene010262;Unigene011448;Unigene014592;Unigene017051;Unigene017712;Unigene017713;Unigene018262;Unigene019038;Unigene035713;Unigene035714;Unigene041866;Unigene041867;Unigene045223;Unigene045224;Unigene052106;Unigene052107;Unigene056132;Unigene072241;Unigene073381;Unigene074358;Unigene074610;Unigene…	K00863+K05411+K09578+K04440+K04441+K11594+K08601+K02861+K05410+K02580+K12159+K04441+K04441+K10652+K07210+K05411+K05411+K11594+K11594+K04734+K04734+K11594+K11594+K04398+K04398+K04398+K08601+K12650+K12651+K08601+K02581+K04398+K08336+K12648+K03175+K08339+K04441+K10652+K00863+K04441+K12650+K04416+K04427+K05410+K10652+K12655+K04440+K00863+K07209+K12646+K10652+K07209+K04735+K12655+K12655+K04467+K02580+…
Metabolism	Amino acid metabolism	Tyrosine metabolism	89	ko00350	Unigene000878;Unigene003356;Unigene003636;Unigene005870;Unigene006254;Unigene006737;Unigene012847;Unigene012848;Unigene013514;Unigene015481;Unigene016641;Unigene018569;Unigene019316;Unigene023037;Unigene029376;Unigene034367;Unigene041288;Unigene041642;Unigene044780;Unigene047553;Unigene049477;Unigene054880;Unigene058957;Unigene066218;Unigene066389;Unigene066392;Unigene066393;Unigene075095;Unigene…	K00815+K01800+K00457+K14455+K00129+K00121+K00121+K00121+K01800+K14455+K13951+K14455+K01593+K01555+K00545+K07253+K00129+K01557+K07253+K00457+K01800+K14455+K00451+K14454+K00121+K00121+K00121+K00815+K00129+K00129+K00815+K07253+K01555+K00129+K00451+K00451+K01557+K07253+K01557+K00457+K07253+K00121+K01800+K00815+K00815+K07253+K00121+K00121+K00545+K00157+K01555+K00501+K14454+K14455+K00121+K00121+K00817+…
Human Diseases	Cardiovascular diseases	Viral myocarditis	88	ko05416	Unigene005615;Unigene008115;Unigene008885;Unigene008886;Unigene010618;Unigene011829;Unigene013499;Unigene013552;Unigene014198;Unigene014202;Unigene014203;Unigene015389;Unigene015492;Unigene015493;Unigene018326;Unigene028266;Unigene029105;Unigene029538;Unigene029971;Unigene036665;Unigene036791;Unigene036792;Unigene037373;Unigene037791;Unigene041727;Unigene041926;Unigene041927;Unigene045228;Unigene…	K03260+K07860+K03260+K03260+K03260+K06752+K05692+K06752+K06751+K05703+K05703+K06856+K04392+K04392+K08738+K05692+K05692+K06265+K06752+K06856+K04006+K04006+K06278+K08738+K06752+K10785+K10785+K05692+K03260+K05692+K05692+K05692+K05692+K05692+K05692+K06751+K06751+K06751+K06751+K08738+K08738+K05692+K05692+K03260+K06464+K06619+K07861+K04398+K06856+K05718+K03260+K07861+K12566+K04503+K06619+K08887+K06619+…
Environmental Information Processing	Signal transduction	Hippo signaling pathway -fly	87	ko04391	Unigene000734;Unigene000748;Unigene002551;Unigene005050;Unigene005496;Unigene005497;Unigene005964;Unigene006146;Unigene006659;Unigene007185;Unigene014625;Unigene015192;Unigene015991;Unigene019351;Unigene022667;Unigene023661;Unigene025403;Unigene026002;Unigene031264;Unigene036766;Unigene036767;Unigene037580;Unigene039977;Unigene041662;Unigene042390;Unigene043012;Unigene044079;Unigene045717;Unigene…	K06630+K09448+K05692+K09448+K04237+K04237+K06630+K06630+K06069+K04237+K16680+K06630+K06630+K06093+K06630+K04237+K06630+K05692+K09851+K06630+K06630+K04382+K04354+K06630+K05692+K05692+K08791+K16682+K16685+K16686+K03456+K09851+K06630+K06630+K06094+K06094+K16197+K16175+K16675+K04440+K05692+K05692+K06685+K06685+K06069+K05692+K05692+K05692+K05692+K16684+K04412+K04412+K04412+K16676+K05692+K05692+K05692+…
Genetic Information Processing	Replication and repair	Mismatch repair	87	ko03430	Unigene003626;Unigene003627;Unigene004808;Unigene004922;Unigene006241;Unigene008429;Unigene009345;Unigene015103;Unigene019424;Unigene022703;Unigene022704;Unigene031064;Unigene032638;Unigene032639;Unigene041443;Unigene042819;Unigene042934;Unigene047396;Unigene048280;Unigene049151;Unigene049389;Unigene049514;Unigene051269;Unigene051839;Unigene052017;Unigene052385;Unigene052440;Unigene053526;Unigene…	K10756+K10756+K08737+K02327+K02327+K10740+K07466+K02327+K02328+K10755+K10755+K10756+K03111+K03111+K10754+K08737+K10858+K08736+K10746+K02328+K10740+K10858+K10756+K10858+K03111+K10739+K04802+K10755+K03504+K10858+K10755+K10755+K10747+K08734+K10858+K07466+K08735+K02327+K02327+K08739+K03505+K08736+K02327+K08734+K10754+K02327+K10746+K10756+K10739+K10739+K10754+K10747+K08736+K10756+K10747+K03505+K10858+…
Organismal Systems	Digestive system	Bile secretion	87	ko04976	Unigene003470;Unigene004083;Unigene004980;Unigene006470;Unigene008206;Unigene010124;Unigene011863;Unigene013585;Unigene016512;Unigene018352;Unigene018353;Unigene018802;Unigene022657;Unigene025324;Unigene032041;Unigene037142;Unigene039473;Unigene043509;Unigene043562;Unigene044284;Unigene044612;Unigene044613;Unigene044614;Unigene044615;Unigene044619;Unigene046355;Unigene046707;Unigene046708;Unigene…	K04345+K08043+K04345+K09864+K08046+K07299+K13855+K09864+K05681+K08043+K08043+K01540+K09864+K09866+K12473+K01539+K09864+K09864+K04632+K09864+K09864+K09864+K09864+K09864+K09864+K13885+K09864+K09864+K05666+K01253+K09864+K12473+K05667+K08046+K08047+K08047+K08524+K09864+K08046+K08047+K09866+K05673+K13855+K05673+K09864+K08043+K00021+K14349+K08049+K01540+K01539+K08049+K05666+K14349+K00021+K05673+K05659+…
Metabolism	Metabolism of terpenoids and polyketides	Terpenoid backbone biosynthesis	87	ko00900	Unigene000789;Unigene000790;Unigene006738;Unigene008471;Unigene009513;Unigene010731;Unigene012252;Unigene012834;Unigene013127;Unigene016264;Unigene018087;Unigene020177;Unigene033831;Unigene034828;Unigene037830;Unigene041494;Unigene045572;Unigene046955;Unigene046998;Unigene047059;Unigene047129;Unigene048942;Unigene052545;Unigene054193;Unigene054955;Unigene054956;Unigene054957;Unigene057016;Unigene…	K08658+K08658+K19177+K12504+K00587+K00787+K19177+K01823+K00787+K00626+K11778+K00587+K12504+K00787+K00021+K19177+K00787+K12505+K00626+K11778+K06013+K00626+K01641+K05954+K00804+K00804+K00804+K08658+K05955+K01597+K00869+K13273+K13273+K01823+K00021+K01641+K05955+K12504+K05954+K00804+K11778+K00787+K06013+K00787+K05955+K01770+K01823+K05906+K05954+K00021+K01823+K01641+K00021+K06013+K01641+K00869+K00021+…
Organismal Systems	Nervous system	Retrograde endocannabinoid signaling	85	ko04723	Unigene001092;Unigene002087;Unigene002381;Unigene003176;Unigene003470;Unigene004083;Unigene004980;Unigene008206;Unigene010073;Unigene014406;Unigene016119;Unigene016120;Unigene016121;Unigene017712;Unigene017713;Unigene018352;Unigene018353;Unigene021233;Unigene021234;Unigene021802;Unigene023086;Unigene023951;Unigene027835;Unigene075189;Unigene075511;Unigene075792;Unigene076813;Unigene080040;Unigene…	K05192+K02677+K04440+K04441+K04345+K08043+K04345+K08046+K02677+K05858+K04634+K04634+K04634+K04441+K04441+K08043+K08043+K04371+K04371+K04960+K04630+K02677+K04537+K08046+K08047+K04960+K08047+K05181+K04960+K08046+K08047+K13985+K04542+K04441+K04630+K04539+K05858+K04958+K04441+K05858+K04371+K07826+K08043+K04630+K02677+K08049+K08049+K04958+K04958+K04634+K04960+K04630+K04958+K04347+K08049+K13700+K04371+…
Organismal Systems	Immune system	Hematopoietic cell lineage	84	ko04640	Unigene001691;Unigene008087;Unigene009350;Unigene009351;Unigene012414;Unigene012415;Unigene013836;Unigene015389;Unigene017440;Unigene017808;Unigene018245;Unigene020206;Unigene020207;Unigene022435;Unigene032105;Unigene036665;Unigene036791;Unigene036792;Unigene041368;Unigene042194;Unigene044773;Unigene073903;Unigene077333;Unigene079145;Unigene080569;Unigene081273;Unigene084935;Unigene087651;Unigene…	K04519+K04008+K05072+K05072+K06483+K06483+K11140+K06856+K05072+K05071+K06475+K05461+K05461+K05072+K06482+K06856+K04006+K04006+K06485+K06256+K06503+K06484+K06483+K05055+K06467+K06856+K06483+K04386+K04386+K04391+K06261+K06256+K06856+K05453+K06259+K06460+K05453+K06483+K06466+K06461+K06484+K06259+K05071+K06454+K06475+K06475+K06493+K06481+K06481+K06484+K04006+K04519+K06451+K05453+K06466+K06480+K06856+…
Human Diseases	Cardiovascular diseases	Arrhythmogenic right ventricular cardiomyopathy (ARVC)	83	ko05412	Unigene003120;Unigene003349;Unigene005527;Unigene011072;Unigene011162;Unigene012414;Unigene012415;Unigene013499;Unigene014306;Unigene015657;Unigene016506;Unigene021250;Unigene021251;Unigene025256;Unigene026253;Unigene026347;Unigene028266;Unigene029105;Unigene029513;Unigene029538;Unigene030663;Unigene030665;Unigene031984;Unigene032105;Unigene032605;Unigene032606;Unigene036840;Unigene037803;Unigene…	K02620+K10381+K05699+K07597+K05699+K06483+K06483+K05692+K10381+K02620+K04492+K10381+K10381+K05853+K06525+K05691+K05692+K05692+K06588+K06265+K06487+K07597+K05699+K06482+K04492+K04492+K12641+K05699+K05699+K05719+K02105+K06485+K05692+K10056+K05692+K05692+K05692+K05692+K05692+K05692+K05692+K06525+K05692+K06484+K12569+K06587+K02620+K06483+K07601+K06483+K12566+K02620+K04864+K06736+K06483+K06484+K12566+…
Organismal Systems	Excretory system	Vasopressin-regulated water reabsorption	82	ko04962	Unigene000498;Unigene000977;Unigene003470;Unigene004083;Unigene004980;Unigene005576;Unigene007019;Unigene008206;Unigene017608;Unigene018352;Unigene018353;Unigene019514;Unigene021552;Unigene024176;Unigene025258;Unigene025324;Unigene031116;Unigene043562;Unigene045749;Unigene045840;Unigene074837;Unigene075189;Unigene076121;Unigene076819;Unigene077782;Unigene079189;Unigene082066;Unigene083477;Unigene…	K09876+K10413+K04345+K08043+K04345+K07905+K10416+K08046+K07887+K08043+K08043+K12462+K10418+K10413+K10413+K09866+K12462+K04632+K09865+K10418+K10413+K08046+K13502+K09876+K10426+K10426+K04648+K08046+K10413+K09866+K13502+K10417+K06027+K09048+K10418+K04648+K10416+K10416+K08043+K06027+K08049+K08049+K09047+K10413+K09048+K10415+K04648+K07889+K07904+K10418+K08049+K10424+K09048+K07889+K08046+K10426+K10416+…
Organismal Systems	Immune system	Antigen processing and presentation	81	ko04612	Unigene000807;Unigene000907;Unigene001107;Unigene001517;Unigene002828;Unigene003619;Unigene004516;Unigene008329;Unigene009075;Unigene011119;Unigene011829;Unigene012258;Unigene013552;Unigene013570;Unigene014198;Unigene018009;Unigene018305;Unigene023371;Unigene027890;Unigene029289;Unigene029603;Unigene029604;Unigene029605;Unigene029971;Unigene031447;Unigene032324;Unigene032358;Unigene033461;Unigene…	K06696+K03283+K08054+K03283+K01368+K09489+K03283+K08054+K01363+K03283+K06752+K05654+K06752+K01369+K06751+K08059+K01363+K08057+K01368+K08058+K04079+K04079+K04079+K06752+K01365+K08056+K04079+K06698+K08055+K03283+K03283+K03283+K06752+K10785+K10785+K08054+K01363+K03283+K03283+K03283+K03283+K03283+K04079+K08066+K03283+K03283+K06751+K06751+K06751+K06751+K05653+K06541+K08061+K08061+K08061+K06752+K03283+…
Organismal Systems	Nervous system	Serotonergic synapse	81	ko04726	Unigene001434;Unigene002087;Unigene003470;Unigene004980;Unigene009023;Unigene009024;Unigene010073;Unigene014406;Unigene016119;Unigene016120;Unigene016121;Unigene021233;Unigene021234;Unigene021802;Unigene022602;Unigene022603;Unigene023086;Unigene023951;Unigene027835;Unigene043562;Unigene075438;Unigene075792;Unigene080040;Unigene083216;Unigene086625;Unigene089560;Unigene091335;Unigene091735;Unigene…	K04520+K02677+K04345+K04345+K02833+K02833+K02677+K05858+K04634+K04634+K04634+K04371+K04371+K04960+K04366+K04366+K04630+K02677+K04537+K04632+K08845+K04960+K05181+K04960+K04542+K04630+K04539+K05858+K00509+K04964+K04958+K05858+K04371+K07826+K04630+K02677+K08845+K04958+K04958+K04634+K04960+K07828+K04630+K04365+K08845+K04958+K04347+K07428+K02187+K07827+K04371+K00461+K04960+K00274+K04958+K04368+K11987+…
Human Diseases	Immune diseases	Rheumatoid arthritis	80	ko05323	Unigene000923;Unigene001691;Unigene002160;Unigene003961;Unigene011374;Unigene011829;Unigene013552;Unigene015389;Unigene016849;Unigene021794;Unigene021843;Unigene024659;Unigene029971;Unigene030716;Unigene031447;Unigene036665;Unigene041727;Unigene041926;Unigene041927;Unigene056031;Unigene074823;Unigene075994;Unigene076939;Unigene077311;Unigene081273;Unigene084624;Unigene085039;Unigene088612;Unigene…	K02150+K04519+K02155+K02153+K02146+K06752+K06752+K06856+K03662+K02151+K13375+K03661+K06752+K05408+K01365+K06856+K06752+K10785+K10785+K05465+K02154+K02154+K06464+K02153+K06856+K02144+K05718+K05506+K05448+K02154+K06856+K02144+K02154+K05453+K05453+K06490+K06464+K02145+K02148+K06752+K02151+K03157+K02154+K02147+K05448+K06464+K02154+K04519+K05453+K01365+K02149+K04448+K04379+K02154+K06490+K06856+K03157+…
Organismal Systems	Nervous system	Long-term depression	80	ko04730	Unigene002087;Unigene009023;Unigene009024;Unigene010073;Unigene010704;Unigene014406;Unigene016119;Unigene016120;Unigene016121;Unigene021233;Unigene021234;Unigene021802;Unigene022550;Unigene022602;Unigene022603;Unigene023086;Unigene023951;Unigene027892;Unigene032616;Unigene035159;Unigene043562;Unigene075438;Unigene075792;Unigene083216;Unigene087052;Unigene087293;Unigene089560;Unigene089839;Unigene…	K02677+K02833+K02833+K02677+K04635+K05858+K04634+K04634+K04634+K04371+K04371+K04960+K04382+K04366+K04366+K04630+K02677+K04369+K05854+K04639+K04632+K08845+K04960+K04960+K03456+K05087+K04630+K05087+K05858+K04958+K04382+K05858+K04371+K04630+K02677+K03456+K04382+K08845+K04958+K04958+K04634+K04960+K07828+K04630+K05087+K04365+K08845+K04958+K04382+K04382+K07827+K04371+K04382+K04960+K04382+K04958+K05087+…
Human Diseases	Cardiovascular diseases	Hypertrophic cardiomyopathy (HCM)	79	ko05410	Unigene003503;Unigene012414;Unigene012415;Unigene013499;Unigene016898;Unigene021843;Unigene024887;Unigene024888;Unigene025256;Unigene026253;Unigene028266;Unigene029105;Unigene029513;Unigene029538;Unigene030663;Unigene032105;Unigene033646;Unigene034072;Unigene036840;Unigene038437;Unigene038880;Unigene041368;Unigene045228;Unigene050434;Unigene056738;Unigene056740;Unigene061451;Unigene061452;Unigene…	K07199+K06483+K06483+K05692+K09290+K13375+K10374+K10374+K05853+K06525+K05692+K05692+K06588+K06265+K06487+K06482+K10373+K10375+K12641+K05719+K07200+K06485+K05692+K05692+K05692+K05692+K05692+K12314+K05692+K05692+K05692+K06525+K05692+K06484+K12569+K06587+K06483+K10373+K06483+K07200+K12566+K04864+K06483+K07198+K06484+K12566+K07199+K05692+K06493+K06481+K12564+K06481+K06484+K04859+K06480+K06484+K13376+…
Metabolism	Amino acid metabolism	Arginine biosynthesis	79	ko00220	Unigene000801;Unigene001457;Unigene005870;Unigene007353;Unigene011086;Unigene015330;Unigene015481;Unigene015591;Unigene015592;Unigene018569;Unigene024398;Unigene026183;Unigene026184;Unigene027433;Unigene031268;Unigene036611;Unigene037083;Unigene051378;Unigene054104;Unigene054105;Unigene054880;Unigene059567;Unigene059568;Unigene059569;Unigene059740;Unigene063358;Unigene065025;Unigene066218;Unigene…	K14677+K00814+K14455+K01915+K00814+K01425+K14455+K01915+K01915+K14455+K00261+K00261+K00261+K01915+K01915+K01915+K00814+K01425+K00261+K00261+K14455+K14677+K14677+K14677+K01425+K01755+K00814+K14454+K01915+K01476+K01915+K00611+K01915+K14677+K01425+K13241+K01915+K01948+K00814+K00611+K01915+K14454+K01915+K14455+K14677+K00814+K01438+K14455+K01755+K01438+K14677+K01940+K01438+K01948+K00261+K00611+K00814+…
Metabolism	Glycan biosynthesis and metabolism	Other glycan degradation	79	ko00511	Unigene002268;Unigene009284;Unigene018236;Unigene018237;Unigene021012;Unigene022120;Unigene022121;Unigene027228;Unigene028998;Unigene035297;Unigene042477;Unigene043335;Unigene044690;Unigene048606;Unigene050155;Unigene055239;Unigene057652;Unigene060891;Unigene062612;Unigene065384;Unigene065386;Unigene068053;Unigene068054;Unigene069134;Unigene069809;Unigene070215;Unigene070972;Unigene071637;Unigene…	K12309+K12373+K17108+K17108+K01191+K12373+K12373+K01201+K01206+K01206+K12373+K01201+K14459+K14459+K01227+K17108+K14459+K12373+K12311+K01206+K01206+K01192+K01192+K12373+K12309+K01191+K01201+K01444+K01191+K12311+K12311+K01206+K12311+K17108+K01201+K17108+K12312+K17108+K17108+K12373+K12373+K12311+K01201+K01192+K12311+K01201+K12373+K12309+K12311+K01227+K12373+K17108+K12373+K01191+K01206+K01206+K17108+…
Metabolism	Metabolism of cofactors and vitamins	One carbon pool by folate	78	ko00670	Unigene003756;Unigene014256;Unigene016476;Unigene017031;Unigene018387;Unigene021065;Unigene022181;Unigene022690;Unigene025177;Unigene032168;Unigene032522;Unigene032523;Unigene032649;Unigene039954;Unigene043096;Unigene044182;Unigene046038;Unigene047290;Unigene050066;Unigene050632;Unigene051596;Unigene056889;Unigene056890;Unigene057367;Unigene058385;Unigene058428;Unigene063712;Unigene070839;Unigene…	K00600+K11787+K00600+K00600+K00600+K00600+K00560+K00602+K00600+K00288+K00287+K00287+K11787+K00605+K00605+K00297+K00600+K11787+K00560+K00602+K01934+K00604+K00604+K13990+K13403+K00548+K00289+K00600+K00600+K00288+K00288+K00600+K00548+K13402+K11787+K00600+K00600+K00600+K00600+K13402+K00600+K00600+K00287+K00604+K00288+K00297+K00605+K00297+K01934+K00297+K11787+K00288+K00548+K00600+K01934+K00288+K13403+…
Metabolism	Lipid metabolism	Biosynthesis of unsaturated fatty acids	78	ko01040	Unigene002132;Unigene005290;Unigene007166;Unigene008580;Unigene008581;Unigene015870;Unigene016251;Unigene023990;Unigene029488;Unigene030466;Unigene032766;Unigene032884;Unigene033610;Unigene033655;Unigene036957;Unigene040715;Unigene042794;Unigene043498;Unigene045268;Unigene045269;Unigene045590;Unigene047713;Unigene047714;Unigene047716;Unigene056937;Unigene058725;Unigene058788;Unigene059230;Unigene…	K07513+K10224+K00232+K00232+K00232+K10703+K10257+K10257+K07513+K10244+K00232+K10257+K10703+K10251+K10226+K10257+K10703+K10251+K07753+K07753+K00507+K00232+K00232+K00232+K00507+K10703+K00232+K01068+K10258+K07515+K01068+K01068+K01068+K00232+K00232+K00232+K10703+K00232+K07513+K10258+K07513+K10251+K10251+K10226+K10257+K07513+K10703+K00232+K10203+K01068+K07513+K00232+K07515+K17360+K07513+K07513+K00232+…
Metabolism	Lipid metabolism	Steroid biosynthesis	76	ko00100	Unigene001540;Unigene006424;Unigene007493;Unigene010825;Unigene012046;Unigene014038;Unigene017703;Unigene021108;Unigene026990;Unigene026991;Unigene031794;Unigene032282;Unigene038119;Unigene038879;Unigene039059;Unigene039062;Unigene039063;Unigene053652;Unigene055869;Unigene061221;Unigene067336;Unigene067705;Unigene070274;Unigene070277;Unigene074381;Unigene076590;Unigene076668;Unigene078668;Unigene…	K00801+K09828+K07748+K01824+K00559+K01052+K05917+K00637+K00511+K00511+K07436+K00511+K09828+K00213+K07750+K07750+K07750+K00559+K07750+K00227+K07750+K00637+K09828+K09828+K00213+K00559+K00801+K05917+K00511+K00227+K01852+K01852+K00801+K00227+K05917+K05917+K01852+K07750+K00637+K08246+K01852+K01852+K01824+K00511+K07750+K07750+K01824+K01852+K05917+K07750+K00222+K00511+K01824+K00511+K05917+K00213+K07750+…
Organismal Systems	Endocrine system	Insulin secretion	76	ko04911	Unigene002087;Unigene003208;Unigene003470;Unigene004083;Unigene004980;Unigene008206;Unigene010073;Unigene010124;Unigene010704;Unigene014287;Unigene014406;Unigene016119;Unigene016120;Unigene016121;Unigene017320;Unigene017912;Unigene018352;Unigene018353;Unigene018802;Unigene021802;Unigene023951;Unigene037142;Unigene043562;Unigene043686;Unigene075189;Unigene075511;Unigene075792;Unigene076813;Unigene…	K02677+K04945+K04345+K08043+K04345+K08046+K02677+K07299+K04635+K04450+K05858+K04634+K04634+K04634+K04515+K04374+K08043+K08043+K01540+K04960+K02677+K01539+K04632+K16882+K08046+K08047+K04960+K08047+K04960+K08046+K09049+K08047+K05858+K09048+K05858+K08043+K02677+K08049+K01540+K01539+K08049+K09047+K04450+K04560+K09048+K04634+K04960+K08049+K09048+K04450+K08047+K08046+K04960+K04515+K04351+K05858+K05870+…
Human Diseases	Cancers	Melanoma	74	ko05218	Unigene001499;Unigene009023;Unigene009024;Unigene012669;Unigene017944;Unigene020539;Unigene021233;Unigene021234;Unigene021817;Unigene022602;Unigene022603;Unigene023776;Unigene027892;Unigene051652;Unigene075438;Unigene080124;Unigene083591;Unigene085932;Unigene086516;Unigene086681;Unigene087293;Unigene089839;Unigene094425;Unigene097873;Unigene097906;Unigene098319;Unigene098791;Unigene099778;Unigene…	K04361+K02833+K02833+K17454+K01110+K02089+K04371+K04371+K04456+K04366+K04366+K04456+K04369+K05099+K08845+K17454+K04451+K02649+K04361+K04503+K05087+K05087+K06618+K00922+K04371+K00922+K06643+K02649+K05099+K04361+K08845+K00922+K04456+K07828+K05689+K05087+K04365+K04361+K08845+K00922+K07827+K04371+K02649+K05099+K02649+K00922+K00922+K05087+K04368+K00922+K04368+K04361+K02091+K04361+K06625+K06621+K06643+…
Organismal Systems	Nervous system	GABAergic synapse	73	ko04727	Unigene001092;Unigene002087;Unigene003470;Unigene004083;Unigene004980;Unigene008206;Unigene010073;Unigene016607;Unigene018352;Unigene018353;Unigene023086;Unigene023737;Unigene023951;Unigene024037;Unigene027566;Unigene027835;Unigene032093;Unigene048810;Unigene055566;Unigene075189;Unigene075511;Unigene076813;Unigene077656;Unigene080040;Unigene083477;Unigene083636;Unigene084570;Unigene086163;Unigene…	K05192+K02677+K04345+K08043+K04345+K08046+K02677+K05704+K08043+K08043+K04630+K08341+K02677+K01580+K01580+K04537+K01580+K14207+K14990+K08046+K08047+K08047+K15374+K05181+K08046+K05704+K08047+K05704+K04542+K15374+K04630+K04539+K01580+K01425+K06027+K01580+K07826+K08043+K06027+K04630+K02677+K08049+K08049+K13576+K04630+K15374+K04347+K08049+K15374+K08047+K08046+K04615+K15376+K15376+K01580+K08047+K08046+…
Metabolism	Glycan biosynthesis and metabolism	Glycosylphosphatidylinositol(GPI)-anchor biosynthesis	72	ko00563	Unigene004277;Unigene009669;Unigene013608;Unigene015896;Unigene019061;Unigene019062;Unigene027610;Unigene032276;Unigene039258;Unigene043526;Unigene044645;Unigene047860;Unigene048227;Unigene048228;Unigene049657;Unigene049658;Unigene049659;Unigene050790;Unigene053761;Unigene055637;Unigene056195;Unigene057846;Unigene059620;Unigene059756;Unigene061497;Unigene061962;Unigene062738;Unigene062782;Unigene…	K05288+K09658+K03859+K05292+K05285+K05285+K05289+K05285+K05284+K05284+K07542+K03434+K05292+K05292+K05283+K05283+K05283+K05290+K03857+K05294+K07541+K03861+K05289+K05288+K03860+K08098+K05291+K03859+K03859+K05293+K03858+K05286+K05286+K05294+K05287+K05310+K05310+K01127+K07541+K03860+K03860+K05285+K05291+K05289+K08098+K03857+K03857+K05286+K05291+K05294+K05291+K05284+K05293+K03860+K05285+K05284+K05290+…
Organismal Systems	Endocrine system	Regulation of lipolysis in adipocyte	71	ko04923	Unigene002420;Unigene003470;Unigene004083;Unigene004980;Unigene008206;Unigene010290;Unigene018352;Unigene018353;Unigene021007;Unigene021817;Unigene023086;Unigene023776;Unigene043562;Unigene075189;Unigene075511;Unigene076813;Unigene079308;Unigene083477;Unigene084570;Unigene085932;Unigene089477;Unigene089560;Unigene092953;Unigene093897;Unigene094786;Unigene097873;Unigene098319;Unigene099585;Unigene…	K13296+K04345+K08043+K04345+K08046+K13699+K08043+K08043+K16816+K04456+K04630+K04456+K04632+K08046+K08047+K08047+K13296+K08046+K08047+K02649+K16172+K04630+K04527+K00509+K04527+K00922+K00922+K08043+K02649+K13296+K04630+K08049+K16817+K08049+K16172+K00922+K04456+K13699+K04630+K00922+K08049+K16172+K02649+K08047+K02649+K08046+K00922+K00922+K11987+K16172+K13296+K00922+K04527+K08047+K08046+K13296+K08043+…
Organismal Systems	Circulatory system	Cardiac muscle contraction	71	ko04260	Unigene000242;Unigene006301;Unigene008107;Unigene010174;Unigene010309;Unigene011079;Unigene011291;Unigene015611;Unigene015889;Unigene015962;Unigene016519;Unigene016898;Unigene017395;Unigene018802;Unigene019876;Unigene019903;Unigene022764;Unigene023773;Unigene024887;Unigene024888;Unigene025256;Unigene029859;Unigene033646;Unigene033753;Unigene034072;Unigene037142;Unigene040881;Unigene042762;Unigene…	K02266+K02266+K02267+K00417+K02273+K00415+K12314+K00413+K00411+K00418+K12314+K09290+K01540+K01540+K02270+K02265+K02263+K02268+K10374+K10374+K05853+K04858+K10373+K02272+K10375+K01539+K02268+K01539+K00412+K00413+K12314+K12314+K12314+K12314+K02262+K10373+K00411+K00419+K00417+K00413+K04864+K02267+K01540+K01539+K02267+K02261+K02271+K17751+K04859+K02266+K02265+K02256+K05742+K00420+K12314+K02265+K02267+…
Human Diseases	Substance dependence	Amphetamine addiction	71	ko05031	Unigene002087;Unigene003470;Unigene004980;Unigene006863;Unigene007191;Unigene009318;Unigene010073;Unigene014287;Unigene017320;Unigene017912;Unigene023951;Unigene025014;Unigene025410;Unigene026843;Unigene026844;Unigene032900;Unigene042431;Unigene042432;Unigene043562;Unigene076861;Unigene082993;Unigene084109;Unigene084758;Unigene086993;Unigene087410;Unigene096318;Unigene097108;Unigene098293;Unigene…	K02677+K04345+K04345+K06269+K02183+K06268+K02677+K04450+K04515+K04374+K02677+K02183+K02183+K02183+K02183+K06269+K02183+K02183+K04632+K02183+K02183+K09049+K02183+K02183+K02183+K09048+K06269+K11411+K04348+K02677+K11411+K09047+K00501+K02183+K04450+K04560+K09048+K02183+K06269+K06269+K09048+K06269+K04450+K04448+K04379+K02183+K00274+K00501+K04515+K02183+K02183+K05870+K00274+K04348+K04515+K09048+K02183+…
Metabolism	Metabolism of cofactors and vitamins	Nicotinate and nicotinamide metabolism	70	ko00760	Unigene004957;Unigene009493;Unigene009882;Unigene011672;Unigene011673;Unigene014640;Unigene015030;Unigene026607;Unigene027401;Unigene029551;Unigene037414;Unigene043257;Unigene045940;Unigene046506;Unigene046572;Unigene051479;Unigene055690;Unigene056312;Unigene057179;Unigene057296;Unigene057980;Unigene057982;Unigene059380;Unigene059956;Unigene061675;Unigene061682;Unigene063028;Unigene064771;Unigene…	K01950+K00858+K01081+K00858+K00858+K03462+K01081+K03462+K01081+K01081+K00858+K10524+K01513+K01081+K03462+K01081+K01081+K10524+K10524+K00323+K00858+K00858+K03426+K00763+K03462+K03462+K01513+K01513+K01081+K06210+K01950+K03783+K00763+K01081+K01950+K06210+K00858+K01081+K00763+K00763+K00541+K00858+K01081+K00763+K01081+K03426+K00763+K00763+K00157+K00323+K00858+K01513+K00323+K00541+K01950+K00858+K00858+…
Metabolism	Carbohydrate metabolism	Butanoate metabolism	69	ko00650	Unigene003971;Unigene004327;Unigene008680;Unigene015544;Unigene016264;Unigene024037;Unigene027566;Unigene032093;Unigene037570;Unigene040974;Unigene046907;Unigene046998;Unigene048942;Unigene049626;Unigene049627;Unigene049651;Unigene052545;Unigene055448;Unigene059351;Unigene060415;Unigene061589;Unigene061986;Unigene063302;Unigene063808;Unigene065638;Unigene066961;Unigene072069;Unigene074493;Unigene…	K01907+K07511+K07511+K00022+K00626+K01580+K01580+K01580+K01640+K00019+K00019+K00626+K00626+K13524+K13524+K00022+K01641+K01907+K07511+K00139+K00109+K01896+K07515+K01580+K00019+K00248+K01027+K01641+K07514+K01907+K01580+K00019+K00139+K00019+K01640+K01580+K00139+K01580+K00019+K01641+K16871+K00139+K16871+K01640+K01641+K00139+K07515+K01640+K01641+K01641+K00109+K01580+K01580+K00019+K01641+K01640+K01907+…
Metabolism	Lipid metabolism	Steroid hormone biosynthesis	67	ko00140	Unigene001945;Unigene005854;Unigene007454;Unigene008593;Unigene008594;Unigene011810;Unigene013193;Unigene015876;Unigene021527;Unigene029376;Unigene033655;Unigene038975;Unigene038976;Unigene040567;Unigene044626;Unigene048287;Unigene048551;Unigene050532;Unigene055204;Unigene055205;Unigene055494;Unigene065496;Unigene074333;Unigene074506;Unigene075756;Unigene077165;Unigene082439;Unigene083269;Unigene…	K00513+K00512+K00512+K17690+K17690+K00512+K01016+K00512+K00699+K00545+K10251+K00512+K00512+K00699+K12343+K00699+K04119+K00489+K00089+K00037+K07408+K07424+K07408+K00699+K07408+K07409+K07424+K07424+K00512+K00251+K00512+K12345+K00512+K12343+K00044+K07424+K10251+K00512+K00699+K12345+K00512+K00545+K07414+K07410+K00699+K07414+K00512+K00699+K10251+K00512+K00699+K00513+K00699+K00699+K00513+K00512+K07414+…
Human Diseases	Cancers	Bladder cancer	65	ko05219	Unigene001499;Unigene009023;Unigene009024;Unigene012669;Unigene016607;Unigene020539;Unigene021233;Unigene021234;Unigene022602;Unigene022603;Unigene022902;Unigene024043;Unigene027892;Unigene041619;Unigene075438;Unigene078533;Unigene080124;Unigene082163;Unigene083591;Unigene083636;Unigene086163;Unigene086516;Unigene086681;Unigene090347;Unigene091653;Unigene093062;Unigene094425;Unigene097906;Unigene…	K04361+K02833+K02833+K17454+K05704+K02089+K04371+K04371+K04366+K04366+K04377+K08803+K04369+K16857+K08845+K08803+K17454+K08803+K04451+K05704+K05704+K04361+K04503+K05448+K08803+K00758+K06618+K04371+K06643+K08803+K05083+K08803+K05448+K04361+K08845+K05094+K07828+K05689+K08803+K04365+K04361+K08845+K05083+K08803+K07827+K04371+K04368+K04368+K04361+K10030+K04361+K06625+K08803+K06621+K06643+K05689+K08803+…
Human Diseases	Cancers	Chemical carcinogenesis	65	ko05204	Unigene001878;Unigene001879;Unigene001880;Unigene002577;Unigene006348;Unigene008265;Unigene008266;Unigene008593;Unigene008594;Unigene012304;Unigene012848;Unigene012934;Unigene014687;Unigene015892;Unigene016641;Unigene020975;Unigene027642;Unigene030664;Unigene038050;Unigene038174;Unigene040688;Unigene040689;Unigene041288;Unigene048287;Unigene050245;Unigene052012;Unigene065496;Unigene074333;Unigene…	K00079+K00079+K00079+K09097+K17692+K00816+K00816+K17690+K17690+K00799+K00121+K00799+K00799+K00799+K13951+K00799+K00799+K00799+K00799+K00799+K01014+K01014+K00129+K00699+K01253+K00816+K07424+K07408+K00699+K00129+K00129+K07408+K07409+K07424+K00799+K00121+K00799+K00799+K00699+K00121+K17685+K00799+K00121+K00816+K07410+K00129+K00699+K00799+K00129+K00699+K11987+K00699+K00799+K00816+K00699+K00129+K00129+…
Human Diseases	Substance dependence	Morphine addiction	65	ko05032	Unigene001092;Unigene002087;Unigene002420;Unigene003470;Unigene004083;Unigene004980;Unigene008206;Unigene009474;Unigene009475;Unigene010073;Unigene011560;Unigene018352;Unigene018353;Unigene023086;Unigene023951;Unigene027835;Unigene043562;Unigene075189;Unigene075511;Unigene076813;Unigene079308;Unigene080040;Unigene082767;Unigene083477;Unigene084570;Unigene086625;Unigene089560;Unigene091335;Unigene…	K05192+K02677+K13296+K04345+K08043+K04345+K08046+K18437+K18437+K02677+K18436+K08043+K08043+K04630+K02677+K04537+K04632+K08046+K08047+K08047+K13296+K05181+K18436+K08046+K08047+K04542+K04630+K04539+K00910+K04439+K07826+K08043+K13296+K04630+K02677+K08049+K08291+K04439+K08049+K00910+K04630+K04439+K13293+K18437+K04347+K00910+K08049+K08047+K18437+K08046+K04615+K08291+K13296+K08047+K08046+K13296+K08043+…
Metabolism	Metabolism of other amino acids	Selenocompound metabolism	65	ko00450	Unigene008265;Unigene008266;Unigene009615;Unigene010355;Unigene020166;Unigene021359;Unigene021360;Unigene025495;Unigene029449;Unigene029451;Unigene029452;Unigene035636;Unigene035637;Unigene038187;Unigene047293;Unigene047881;Unigene049617;Unigene052012;Unigene053373;Unigene058428;Unigene059221;Unigene063230;Unigene063231;Unigene065172;Unigene066126;Unigene066136;Unigene074712;Unigene076103;Unigene…	K00816+K00816+K01874+K01008+K01758+K13811+K13811+K00384+K01008+K01008+K01008+K00384+K00384+K00384+K01758+K01763+K00384+K00816+K13811+K00548+K00816+K03341+K03341+K10837+K01874+K01874+K13811+K13811+K00548+K13811+K01874+K01874+K13811+K01008+K13811+K01874+K01874+K00384+K01763+K00816+K13811+K01008+K00548+K01874+K00384+K01874+K00384+K13811+K00384+K00816+K00548+K13811+K00384+K00816+K13811+K01758+K13811+…
Metabolism	Glycan biosynthesis and metabolism	Other types of O-glycan biosynthesis	64	ko00514	Unigene002668;Unigene003572;Unigene005818;Unigene007769;Unigene008281;Unigene024735;Unigene024982;Unigene027825;Unigene029412;Unigene029413;Unigene032625;Unigene034572;Unigene035504;Unigene035882;Unigene035883;Unigene035884;Unigene040146;Unigene041808;Unigene042637;Unigene054242;Unigene054677;Unigene055556;Unigene056247;Unigene061275;Unigene063641;Unigene063642;Unigene063643;Unigene065473;Unigene…	K09666+K00728+K05948+K09667+K00778+K11703+K09666+K13676+K09666+K09666+K13646+K07966+K13676+K09667+K09667+K09667+K03691+K11703+K13667+K09667+K09666+K18134+K00779+K00728+K13675+K13675+K13675+K09666+K00728+K03691+K09666+K07968+K18134+K09666+K09666+K13676+K05948+K07967+K09666+K09666+K09666+K13667+K00735+K09667+K00728+K03691+K03691+K07966+K09666+K13667+K05948+K09666+K18134+K09666+K09667+K09666+K07967+…
Metabolism	Lipid metabolism	Ether lipid metabolism	63	ko00565	Unigene007814;Unigene011321;Unigene011322;Unigene012611;Unigene015573;Unigene016004;Unigene020638;Unigene034756;Unigene038407;Unigene043488;Unigene044002;Unigene044003;Unigene044187;Unigene045576;Unigene045752;Unigene047861;Unigene048838;Unigene051153;Unigene052115;Unigene056701;Unigene057025;Unigene057139;Unigene057641;Unigene059396;Unigene059806;Unigene059921;Unigene065146;Unigene065590;Unigene…	K16860+K00994+K00994+K13644+K13512+K01115+K01080+K00803+K16794+K00993+K01047+K01047+K01062+K01062+K01080+K01047+K08743+K01080+K01047+K01115+K16795+K16860+K16343+K13510+K16343+K01115+K01115+K01047+K01047+K01047+K16342+K01115+K13644+K13512+K13510+K16795+K01115+K01019+K01080+K00994+K13510+K16795+K16817+K08743+K16794+K01047+K13510+K01115+K01115+K01115+K13512+K00803+K01080+K00994+K16860+K13644+K00993+…
Human Diseases	Endocrine and metabolic diseases	Type II diabetes mellitus	63	ko04930	Unigene002381;Unigene004036;Unigene006200;Unigene010837;Unigene012130;Unigene016659;Unigene016660;Unigene019398;Unigene021233;Unigene021234;Unigene049878;Unigene075105;Unigene079310;Unigene080384;Unigene081173;Unigene083892;Unigene084658;Unigene085435;Unigene085721;Unigene085932;Unigene086133;Unigene089477;Unigene092953;Unigene094500;Unigene094786;Unigene097873;Unigene097906;Unigene098319;Unigene…	K04440+K00844+K00844+K00873+K00844+K06068+K06068+K00844+K04371+K04371+K00844+K07203+K07203+K06068+K06068+K07203+K00844+K00844+K12406+K02649+K00873+K16172+K04527+K07203+K04527+K00922+K04371+K00922+K02649+K16172+K07203+K00922+K07209+K07209+K00922+K16172+K04371+K02649+K07209+K02649+K00922+K00922+K06068+K16172+K00922+K04527+K16172+K02649+K07203+K02649+K04697+K07203+K04527+K00922+K02649+K00873+K02649+…
Organismal Systems	Nervous system	Synaptic vesicle cycle	63	ko04721	Unigene000401;Unigene000707;Unigene000923;Unigene002160;Unigene003961;Unigene009326;Unigene010541;Unigene010542;Unigene011374;Unigene012271;Unigene020901;Unigene021013;Unigene021794;Unigene022574;Unigene024659;Unigene036741;Unigene036883;Unigene039445;Unigene074823;Unigene075101;Unigene075445;Unigene075994;Unigene076497;Unigene077311;Unigene077354;Unigene081621;Unigene081827;Unigene082089;Unigene…	K11827+K01528+K02150+K02155+K02153+K04645+K11824+K11824+K02146+K01528+K11826+K04644+K02151+K04646+K03661+K01528+K11825+K04646+K02154+K08486+K01528+K02154+K11824+K02153+K11824+K15292+K11824+K01528+K02144+K02154+K02144+K06027+K15296+K02154+K06027+K08486+K15294+K02145+K02148+K02151+K02154+K02147+K04560+K02154+K01528+K08486+K11824+K02149+K02154+K11824+K02154+K02145+K02152+K02147+K02154+K02154+K01528+…
Metabolism	Energy metabolism	Nitrogen metabolism	63	ko00910	Unigene000228;Unigene001574;Unigene003057;Unigene007353;Unigene011343;Unigene015522;Unigene015591;Unigene015592;Unigene019004;Unigene021118;Unigene022915;Unigene024019;Unigene024398;Unigene026183;Unigene026184;Unigene027433;Unigene028638;Unigene031268;Unigene035404;Unigene035405;Unigene036611;Unigene037306;Unigene037903;Unigene050249;Unigene054104;Unigene054105;Unigene055077;Unigene062890;Unigene…	K01501+K01725+K00264+K01915+K01673+K01501+K01915+K01915+K00264+K00264+K01672+K00264+K00261+K00261+K00261+K01915+K01501+K01915+K01673+K01673+K01915+K01672+K01672+K00264+K00261+K00261+K01672+K01672+K01915+K00264+K01501+K01501+K00264+K01915+K00264+K00264+K01915+K01501+K00264+K01672+K01915+K01948+K01915+K01915+K00264+K00264+K01672+K01948+K00261+K01948+K01948+K01672+K00264+K01501+K01948+K18245+K00264+…
Metabolism	Energy metabolism	Sulfur metabolism	62	ko00920	Unigene002336;Unigene002874;Unigene003374;Unigene007258;Unigene007259;Unigene014488;Unigene014489;Unigene018326;Unigene018327;Unigene021359;Unigene021360;Unigene023663;Unigene031406;Unigene037791;Unigene045566;Unigene046706;Unigene048703;Unigene048868;Unigene053373;Unigene055377;Unigene059912;Unigene059913;Unigene064923;Unigene064925;Unigene064926;Unigene074410;Unigene074712;Unigene074978;Unigene…	K01738+K01738+K01738+K01738+K01738+K01082+K01082+K08738+K08738+K13811+K13811+K01738+K01738+K08738+K15759+K17725+K01082+K00387+K13811+K17725+K17218+K17218+K08738+K08738+K08738+K01082+K13811+K01011+K13811+K01738+K13811+K01011+K15759+K01738+K01011+K13811+K13811+K01011+K17725+K01011+K17218+K00387+K17725+K00387+K01738+K08738+K13811+K01738+K01011+K00387+K17725+K13811+K17725+K13811+K00387+K13811+K00387+…
Metabolism	Lipid metabolism	Fatty acid biosynthesis	62	ko00061	Unigene001447;Unigene006962;Unigene015860;Unigene016311;Unigene016312;Unigene018417;Unigene022590;Unigene023067;Unigene029904;Unigene032525;Unigene042464;Unigene045298;Unigene053906;Unigene054672;Unigene058625;Unigene058678;Unigene058679;Unigene060818;Unigene066219;Unigene067043;Unigene069823;Unigene074295;Unigene081513;Unigene081789;Unigene081945;Unigene082641;Unigene086108;Unigene087258;Unigene…	K11262+K01897+K11262+K01897+K01897+K01897+K01897+K01897+K01897+K01897+K01897+K00665+K15013+K01897+K00645+K15013+K15013+K11262+K09458+K00665+K01897+K01897+K01897+K00665+K01897+K09458+K01946+K11262+K11262+K01897+K01946+K01897+K01946+K15013+K01897+K01897+K01897+K01897+K01897+K11262+K11262+K01897+K01897+K01897+K09458+K01897+K01897+K01897+K11262+K11262+K01897+K01897+K01897+K01946+K01897+K01897+K11262+…
Metabolism	Amino acid metabolism	Histidine metabolism	60	ko00340	Unigene006254;Unigene007479;Unigene016180;Unigene016705;Unigene019316;Unigene020774;Unigene021474;Unigene027745;Unigene028760;Unigene033334;Unigene041288;Unigene057367;Unigene057785;Unigene061521;Unigene062156;Unigene062157;Unigene065110;Unigene068801;Unigene070053;Unigene070054;Unigene074951;Unigene075383;Unigene075441;Unigene081004;Unigene083480;Unigene084090;Unigene095930;Unigene097537;Unigene…	K00129+K14085+K01745+K00128+K01593+K00128+K00128+K08660+K00128+K00128+K00129+K13990+K00128+K14085+K08660+K08660+K00128+K00149+K00128+K00128+K00128+K00129+K00129+K00129+K00128+K00128+K00128+K00128+K00128+K00128+K00128+K01745+K01745+K00128+K00817+K00128+K00129+K08660+K00129+K00128+K00128+K00274+K00128+K14085+K00274+K14085+K00129+K00128+K00128+K00129+K00128+K01593+K14085+K01590+K00129+K00149+K00274+…
Organismal Systems	Excretory system	Endocrine and other factor-regulated calcium reabsorption	59	ko04961	Unigene000401;Unigene000707;Unigene002087;Unigene003470;Unigene004980;Unigene008206;Unigene009326;Unigene010073;Unigene010541;Unigene010542;Unigene012271;Unigene014406;Unigene016119;Unigene016120;Unigene016121;Unigene018802;Unigene020901;Unigene021013;Unigene022574;Unigene023951;Unigene036741;Unigene036883;Unigene037142;Unigene039445;Unigene043562;Unigene075189;Unigene075445;Unigene076497;Unigene…	K11827+K01528+K02677+K04345+K04345+K08046+K04645+K02677+K11824+K11824+K01528+K05858+K04634+K04634+K04634+K01540+K11826+K04644+K04646+K02677+K01528+K11825+K01539+K04646+K04632+K08046+K01528+K11824+K11824+K11824+K01528+K08046+K05858+K05858+K02677+K08049+K01540+K01539+K08049+K04634+K07904+K01528+K11824+K08049+K08046+K11824+K05858+K08046+K05858+K08046+K01540+K08049+K01528+K07904+K07904+K04645+K05858+…
Metabolism	Glycan biosynthesis and metabolism	Glycosaminoglycan biosynthesis - heparan sulfate / heparin	58	ko00534	Unigene008398;Unigene010821;Unigene012818;Unigene014813;Unigene034429;Unigene039036;Unigene050857;Unigene051733;Unigene054454;Unigene058666;Unigene059525;Unigene064444;Unigene065173;Unigene066274;Unigene067391;Unigene068291;Unigene074429;Unigene077548;Unigene077618;Unigene081036;Unigene081429;Unigene085857;Unigene087798;Unigene089371;Unigene091069;Unigene093005;Unigene093638;Unigene094302;Unigene…	K02367+K02367+K02370+K10158+K10158+K07809+K02513+K00734+K02370+K02366+K00733+K02514+K00771+K02367+K02577+K08104+K00734+K01793+K02369+K01793+K01793+K10158+K02366+K00734+K02366+K00771+K00733+K02370+K02370+K02514+K02369+K00734+K00734+K02366+K02576+K00734+K00771+K00771+K01793+K02577+K02576+K00734+K02576+K02367+K02576+K00771+K02576+K00734+K02370+K10158+K01793+K02513+K10158+K02577+K00734+K02514+K02370+…
Metabolism	Glycan biosynthesis and metabolism	Mucin type O-glycan biosynthesis	58	ko00512	Unigene003621;Unigene012646;Unigene016751;Unigene021176;Unigene025453;Unigene029197;Unigene041440;Unigene041573;Unigene046339;Unigene051700;Unigene052578;Unigene052579;Unigene052580;Unigene052966;Unigene053177;Unigene054953;Unigene061333;Unigene062516;Unigene062754;Unigene064958;Unigene064960;Unigene068362;Unigene068363;Unigene068946;Unigene068947;Unigene068948;Unigene068949;Unigene068950;Unigene…	K00710+K00710+K00710+K00710+K09905+K00710+K00710+K00780+K00731+K00710+K00710+K00710+K00710+K00710+K00710+K00710+K00710+K00710+K00710+K00710+K00710+K00710+K00710+K00710+K00710+K00710+K00710+K00710+K00710+K00710+K00710+K00710+K00710+K00731+K00710+K00710+K00731+K00731+K09653+K00710+K03368+K00710+K00710+K00710+K03368+K00710+K00710+K00710+K00731+K00710+K00710+K00710+K09662+K00710+K00710+K00710+K00710+…
Human Diseases	Infectious diseases	Malaria	58	ko05144	Unigene001691;Unigene010294;Unigene010689;Unigene011199;Unigene016968;Unigene021843;Unigene026354;Unigene041619;Unigene041926;Unigene041927;Unigene051652;Unigene075460;Unigene076939;Unigene084540;Unigene084863;Unigene085039;Unigene085195;Unigene087482;Unigene088618;Unigene091133;Unigene097768;Unigene098968;Unigene100079;Unigene101526;Unigene101849;Unigene101932;Unigene102442;Unigene106154;Unigene…	K04519+K13823+K06471+K06728+K04550+K13375+K06257+K16857+K10785+K10785+K05099+K04550+K06464+K13822+K06471+K05718+K04550+K04550+K04729+K04550+K04550+K06259+K06490+K06464+K05099+K06259+K04550+K04550+K04550+K06464+K04550+K04519+K06728+K06490+K05099+K04011+K04550+K04550+K04729+K13376+K04550+K10159+K04550+K04550+K04550+K10030+K05482+K05718+K13376+K04659+K04519+K04550+K06508+K06576+K04550+K04550+K06543+…
Organismal Systems	Excretory system	Aldosterone-regulated sodium reabsorption	56	ko04960	Unigene002087;Unigene006099;Unigene006100;Unigene010073;Unigene017666;Unigene018802;Unigene021233;Unigene021234;Unigene023951;Unigene037142;Unigene077544;Unigene080044;Unigene083980;Unigene085932;Unigene089477;Unigene092953;Unigene094786;Unigene097873;Unigene097906;Unigene098319;Unigene099778;Unigene100420;Unigene100899;Unigene101686;Unigene102650;Unigene106245;Unigene106370;Unigene106630;Unigene…	K02677+K06276+K06276+K02677+K13358+K01540+K04371+K04371+K02677+K01539+K13302+K13305+K13305+K02649+K16172+K04527+K04527+K00922+K04371+K00922+K02649+K02677+K01540+K01539+K06276+K13305+K13358+K13305+K16172+K00922+K04824+K00922+K16172+K07827+K04371+K02649+K02649+K00922+K00922+K04824+K16172+K00922+K04527+K16172+K02649+K02649+K01540+K04527+K00922+K02649+K06644+K02649+K06276+K06276+K04371+K16172
Organismal Systems	Digestive system	Protein digestion and absorption	56	ko04974	Unigene003208;Unigene005773;Unigene009644;Unigene010859;Unigene018802;Unigene022260;Unigene030421;Unigene037142;Unigene042035;Unigene042036;Unigene043134;Unigene045919;Unigene047485;Unigene048810;Unigene051448;Unigene051635;Unigene054094;Unigene079058;Unigene080542;Unigene083148;Unigene085927;Unigene089143;Unigene089729;Unigene092543;Unigene096014;Unigene096359;Unigene100899;Unigene101686;Unigene…	K04945+K06823+K06238+K01285+K01540+K08131+K06236+K01539+K06519+K06519+K06238+K06238+K06238+K14207+K01312+K05616+K01312+K07603+K16628+K01278+K01278+K14210+K07603+K01312+K07603+K06236+K01540+K01539+K06238+K16628+K13867+K06823+K06823+K01285+K06823+K12040+K06823+K13867+K06238+K13867+K06237+K07603+K01285+K16628+K06238+K01278+K16628+K07603+K06236+K06238+K01540+K06236+K06238+K07603+K06236+K01285
Metabolism	Lipid metabolism	Fatty acid elongation	55	ko00062	Unigene002947;Unigene004327;Unigene008680;Unigene015544;Unigene015870;Unigene016754;Unigene021307;Unigene024103;Unigene030466;Unigene033610;Unigene033655;Unigene040339;Unigene042794;Unigene043498;Unigene049651;Unigene051662;Unigene051663;Unigene057521;Unigene058725;Unigene059005;Unigene059007;Unigene059230;Unigene059351;Unigene060248;Unigene060249;Unigene062953;Unigene063278;Unigene063302;Unigene…	K10247+K07511+K07511+K00022+K10703+K01074+K01074+K07512+K10244+K10703+K10251+K01074+K10703+K10251+K00022+K01074+K01074+K10249+K10703+K07508+K07508+K01068+K07511+K07509+K07509+K10258+K07512+K07515+K01068+K01068+K01068+K01074+K01074+K07508+K10703+K10258+K07508+K10251+K10251+K10703+K10203+K01068+K01074+K07515+K17360+K10258+K10258+K10251+K10258+K00022+K07515+K10703+K07509+K10703+K10258
Metabolism	Amino acid metabolism	Phenylalanine metabolism	54	ko00360	Unigene000878;Unigene003636;Unigene005870;Unigene006254;Unigene015481;Unigene018569;Unigene019316;Unigene034367;Unigene041288;Unigene044780;Unigene047553;Unigene054880;Unigene066218;Unigene068271;Unigene068272;Unigene068273;Unigene075095;Unigene075383;Unigene075441;Unigene075880;Unigene076392;Unigene081004;Unigene089237;Unigene092603;Unigene093649;Unigene098746;Unigene102226;Unigene103324;Unigene…	K00815+K00457+K14455+K00129+K14455+K14455+K01593+K07253+K00129+K07253+K00457+K14455+K14454+K00500+K00500+K00500+K00815+K00129+K00129+K00815+K07253+K00129+K07253+K00457+K07253+K00815+K00815+K07253+K14454+K14455+K01904+K00500+K00817+K14455+K00129+K07253+K00129+K00815+K00274+K00274+K00129+K07253+K00815+K00129+K01593+K14455+K00129+K00274+K00274+K14455+K00815+K14454+K00457+K00274
Organismal Systems	Endocrine system	Ovarian Steroidogenesis	54	ko04913	Unigene003470;Unigene004083;Unigene004980;Unigene007454;Unigene008206;Unigene018352;Unigene018353;Unigene032041;Unigene043562;Unigene046355;Unigene066913;Unigene071686;Unigene074333;Unigene075189;Unigene075511;Unigene075756;Unigene076813;Unigene083477;Unigene084570;Unigene087293;Unigene088241;Unigene088662;Unigene089839;Unigene092953;Unigene094786;Unigene097993;Unigene099585;Unigene100753;Unigene…	K04345+K08043+K04345+K00512+K08046+K08043+K08043+K12473+K04632+K13885+K01068+K12473+K07408+K08046+K08047+K07408+K08047+K08046+K08047+K05087+K00512+K00044+K05087+K04527+K04527+K16620+K08043+K08049+K08049+K05087+K07410+K08049+K08047+K00461+K08046+K12473+K05087+K11987+K12473+K04527+K08047+K08046+K08043+K08047+K08046+K08049+K00044+K04527+K05087+K00512+K08047+K07418+K05087+K00512
Metabolism	Glycan biosynthesis and metabolism	Glycosaminoglycan degradation	53	ko00531	Unigene002268;Unigene005895;Unigene009284;Unigene014335;Unigene016058;Unigene022120;Unigene022121;Unigene025026;Unigene034180;Unigene034952;Unigene042477;Unigene054515;Unigene055394;Unigene057465;Unigene060239;Unigene060891;Unigene061150;Unigene061206;Unigene064143;Unigene064720;Unigene064721;Unigene064722;Unigene064955;Unigene068505;Unigene069134;Unigene069809;Unigene072593;Unigene072594;Unigene…	K12309+K10532+K12373+K10532+K01565+K12373+K12373+K01195+K01136+K01217+K12373+K01137+K01195+K07964+K01565+K12373+K01136+K01205+K01137+K01197+K01197+K01197+K10532+K01132+K12373+K12309+K01195+K01195+K01195+K01195+K10532+K12373+K12373+K01197+K01135+K01132+K12373+K01205+K12309+K12373+K12373+K12373+K01205+K01195+K01205+K12373+K01195+K01205+K01205+K01197+K01197+K12309+K12373
Human Diseases	Neurodegenerative diseases	Amyotrophic lateral sclerosis (ALS)	50	ko05014	Unigene003176;Unigene009318;Unigene015492;Unigene015493;Unigene016980;Unigene017608;Unigene017712;Unigene017713;Unigene018326;Unigene021197;Unigene021533;Unigene026250;Unigene026585;Unigene026897;Unigene036238;Unigene037628;Unigene037791;Unigene064925;Unigene064926;Unigene077792;Unigene083591;Unigene086735;Unigene087085;Unigene090667;Unigene096863;Unigene097981;Unigene099815;Unigene100442;Unigene…	K04441+K06268+K04392+K04392+K04574+K07887+K04441+K04441+K08738+K04574+K11519+K02159+K04565+K04570+K03158+K11518+K08738+K08738+K08738+K04426+K04451+K04432+K04441+K04432+K04441+K03781+K04348+K04569+K03781+K08738+K02308+K04569+K02187+K04433+K00432+K02084+K02308+K01370+K02308+K04433+K04348+K01370+K02084+K04575+K08738+K05141+K02187+K04426+K04348+K04426
Human Diseases	Cancers	Basal cell carcinoma	49	ko05217	Unigene001895;Unigene003120;Unigene012515;Unigene013102;Unigene015657;Unigene016140;Unigene016506;Unigene021627;Unigene030119;Unigene032605;Unigene032606;Unigene040758;Unigene069959;Unigene074330;Unigene075000;Unigene076444;Unigene076885;Unigene077576;Unigene083591;Unigene084218;Unigene084518;Unigene084666;Unigene086211;Unigene087775;Unigene099144;Unigene104019;Unigene105808;Unigene112986;Unigene…	K02353+K02620+K02353+K02157+K02620+K02235+K04492+K02157+K03083+K04492+K04492+K02105+K06229+K00444+K04662+K02620+K02353+K02375+K04451+K02157+K02376+K03083+K02085+K02620+K02085+K03083+K04385+K02376+K02432+K03083+K02353+K02157+K04385+K04385+K02353+K00572+K02432+K02376+K02353+K02353+K04491+K02085+K00444+K02085+K16798+K04662+K00444+K00444+K02376
Metabolism	Metabolism of cofactors and vitamins	Pantothenate and CoA biosynthesis	49	ko00770	Unigene000815;Unigene002612;Unigene005107;Unigene010716;Unigene011220;Unigene014264;Unigene017485;Unigene038518;Unigene038519;Unigene040179;Unigene045940;Unigene050382;Unigene050383;Unigene055889;Unigene056121;Unigene059043;Unigene061484;Unigene062190;Unigene063028;Unigene064771;Unigene065341;Unigene075632;Unigene082838;Unigene089748;Unigene094339;Unigene100143;Unigene105357;Unigene106112;Unigene…	K02318+K01598+K08069+K08069+K09680+K02318+K00826+K00826+K00826+K09680+K01513+K01431+K01431+K00207+K09680+K01464+K06133+K01598+K01513+K01513+K02318+K00826+K00207+K00207+K09680+K01922+K09680+K02318+K09680+K09680+K01922+K01513+K09680+K06133+K00207+K09680+K01431+K09680+K09680+K09680+K00207+K06133+K09680+K01598+K01922+K09680+K01513+K00207+K00207
Metabolism	Glycan biosynthesis and metabolism	Glycosaminoglycan biosynthesis - chondroitin sulfate / dermatan sulfate	48	ko00532	Unigene006928;Unigene014813;Unigene022997;Unigene034429;Unigene048475;Unigene049583;Unigene049649;Unigene049712;Unigene051733;Unigene054923;Unigene056506;Unigene059525;Unigene065173;Unigene074429;Unigene079078;Unigene085857;Unigene087253;Unigene089371;Unigene089603;Unigene089946;Unigene092535;Unigene093005;Unigene093638;Unigene094784;Unigene101986;Unigene102768;Unigene107760;Unigene108667;Unigene…	K01017+K10158+K00746+K10158+K00747+K01017+K00746+K01017+K00734+K01017+K13499+K00733+K00771+K00734+K08106+K10158+K08106+K00734+K03419+K00747+K00747+K00771+K00733+K03193+K00734+K00734+K00734+K00771+K00771+K00734+K00746+K08106+K01794+K13499+K00771+K00734+K10158+K08105+K01017+K08105+K01020+K10158+K08106+K03419+K00734+K03193+K03419+K00747
Organismal Systems	Digestive system	Mineral absorption	47	ko04978	Unigene009403;Unigene009404;Unigene010228;Unigene010229;Unigene010788;Unigene016349;Unigene018802;Unigene019219;Unigene022875;Unigene022876;Unigene025606;Unigene032613;Unigene032614;Unigene037142;Unigene084265;Unigene087362;Unigene088310;Unigene097961;Unigene098024;Unigene100899;Unigene101686;Unigene102917;Unigene103224;Unigene106271;Unigene108440;Unigene113605;Unigene117473;Unigene117773;Unigene…	K04982+K04982+K14685+K14685+K14736+K14737+K01540+K17686+K13625+K13625+K12347+K00522+K00522+K01539+K14738+K14686+K14685+K04982+K04982+K01540+K01539+K12347+K00510+K17686+K14688+K04982+K04982+K04982+K14739+K12040+K07213+K14685+K14688+K14710+K14736+K05011+K12347+K14704+K12347+K12347+K12347+K00510+K14688+K14706+K01540+K14738+K04982
Metabolism	Metabolism of cofactors and vitamins	Folate biosynthesis	46	ko00790	Unigene002911;Unigene003952;Unigene008792;Unigene016736;Unigene019910;Unigene021430;Unigene032522;Unigene032523;Unigene036396;Unigene040860;Unigene044389;Unigene046996;Unigene046997;Unigene055167;Unigene055322;Unigene060316;Unigene060317;Unigene061037;Unigene061812;Unigene063644;Unigene063988;Unigene063989;Unigene063990;Unigene087919;Unigene096511;Unigene096600;Unigene100770;Unigene103119;Unigene…	K01495+K01495+K01930+K01077+K01077+K01077+K00287+K00287+K03635+K01077+K01077+K01495+K01495+K01737+K03635+K03639+K03639+K01307+K01930+K00357+K00072+K00072+K00072+K01077+K00287+K01077+K01307+K01077+K00310+K00357+K03635+K03635+K01077+K01077+K01307+K01495+K00072+K01930+K00072+K01307+K00287+K01930+K01737+K00287+K01930+K01930
Metabolism	Glycan biosynthesis and metabolism	Glycosphingolipid biosynthesis - globo series	45	ko00603	Unigene009284;Unigene022120;Unigene022121;Unigene023022;Unigene030095;Unigene030096;Unigene041573;Unigene042477;Unigene044529;Unigene055756;Unigene058752;Unigene060012;Unigene060891;Unigene062017;Unigene062041;Unigene062042;Unigene062043;Unigene064645;Unigene069134;Unigene080149;Unigene092549;Unigene093232;Unigene094259;Unigene100146;Unigene101828;Unigene105935;Unigene111874;Unigene113019;Unigene…	K12373+K12373+K12373+K07407+K01189+K01189+K00780+K12373+K03877+K01204+K00718+K00718+K12373+K01988+K01204+K01204+K01204+K00718+K12373+K01988+K12373+K07407+K12373+K00719+K03368+K00719+K12373+K01988+K12373+K00718+K12373+K03368+K12373+K01204+K07407+K01988+K03877+K12373+K00719+K01988+K07407+K07407+K12373+K01204+K07407
Human Diseases	Immune diseases	Primary immunodeficiency	45	ko05340	Unigene005148;Unigene009350;Unigene009351;Unigene012258;Unigene013924;Unigene013925;Unigene015389;Unigene016726;Unigene017440;Unigene019038;Unigene022435;Unigene036665;Unigene049700;Unigene049701;Unigene063153;Unigene075472;Unigene076367;Unigene076485;Unigene078606;Unigene081273;Unigene088235;Unigene088458;Unigene090977;Unigene093063;Unigene093249;Unigene093386;Unigene097258;Unigene102583;Unigene…	K16056+K05072+K05072+K05654+K06478+K06478+K06856+K03648+K05072+K07210+K05072+K06856+K06478+K06478+K01488+K16056+K05070+K01488+K05856+K06856+K05070+K05653+K06478+K08061+K08061+K06856+K08061+K10887+K10887+K06454+K08062+K05654+K08061+K06451+K06856+K08062+K05653+K10887+K06450+K01488+K05654+K07210+K06856+K06451+K01488
Organismal Systems	Environmental adaptation	Circadian rhythm	45	ko04710	Unigene001401;Unigene003503;Unigene008351;Unigene013057;Unigene013058;Unigene018096;Unigene018097;Unigene019315;Unigene024021;Unigene037248;Unigene037249;Unigene038880;Unigene076574;Unigene079492;Unigene081948;Unigene082497;Unigene085933;Unigene094787;Unigene100020;Unigene101679;Unigene102320;Unigene103544;Unigene105616;Unigene114814;Unigene116761;Unigene122196;Unigene122680;Unigene135914;Unigene…	K03868+K07199+K03347+K08960+K08960+K03729+K03729+K08959+K08960+K03094+K03094+K07200+K02633+K09026+K08959+K02295+K07200+K08532+K10269+K07198+K08960+K07199+K08960+K02223+K02223+K02223+K03362+K02633+K03728+K05870+K07199+K07199+K09026+K07200+K07198+K07199+K07199+K07198+K03362+K09026+K08960+K09026+K08959+K02296+K08959
Metabolism	Lipid metabolism	alpha-Linolenic acid metabolism	45	ko00592	Unigene002132;Unigene007166;Unigene008580;Unigene008581;Unigene029488;Unigene032766;Unigene036957;Unigene044002;Unigene044003;Unigene047713;Unigene047714;Unigene047716;Unigene047861;Unigene052115;Unigene057641;Unigene058788;Unigene059806;Unigene065590;Unigene065591;Unigene065592;Unigene068447;Unigene068502;Unigene071444;Unigene082716;Unigene086656;Unigene086680;Unigene089797;Unigene099001;Unigene…	K07513+K00232+K00232+K00232+K07513+K00232+K10226+K01047+K01047+K00232+K00232+K00232+K01047+K01047+K16343+K00232+K16343+K01047+K01047+K01047+K16342+K00232+K00232+K00232+K00232+K07513+K07513+K10226+K16817+K01047+K07513+K00232+K07513+K00232+K07513+K07513+K00232+K07513+K07513+K07513+K00232+K07513+K00232+K00232+K07513
Human Diseases	Infectious diseases	African trypanosomiasis	44	ko05143	Unigene001691;Unigene002087;Unigene010073;Unigene010294;Unigene014406;Unigene015389;Unigene016119;Unigene016120;Unigene016121;Unigene023951;Unigene036665;Unigene061664;Unigene081273;Unigene084540;Unigene086859;Unigene087034;Unigene088618;Unigene091735;Unigene093386;Unigene097596;Unigene099736;Unigene100079;Unigene100420;Unigene102404;Unigene108535;Unigene115045;Unigene116386;Unigene117760;Unigene…	K04519+K02677+K02677+K13823+K05858+K06856+K04634+K04634+K04634+K02677+K06856+K01392+K06856+K13822+K06241+K06241+K04729+K05858+K06856+K05858+K06241+K06490+K02677+K01392+K04634+K04519+K01392+K14480+K06490+K06856+K05858+K06241+K04729+K06241+K05482+K05858+K04519+K04234+K06241+K06856+K05858+K05858+K05858+K06241
Human Diseases	Cancers	Thyroid cancer	44	ko05216	Unigene003120;Unigene009023;Unigene009024;Unigene009509;Unigene009510;Unigene009740;Unigene015657;Unigene016506;Unigene016898;Unigene021233;Unigene021234;Unigene022902;Unigene026849;Unigene027892;Unigene031004;Unigene032605;Unigene032606;Unigene040758;Unigene076309;Unigene076444;Unigene082262;Unigene083591;Unigene085183;Unigene086681;Unigene087775;Unigene097906;Unigene098223;Unigene106727;Unigene…	K02620+K02833+K02833+K09291+K09291+K08530+K02620+K04492+K09290+K04371+K04371+K04377+K09291+K04369+K09289+K04492+K04492+K02105+K09291+K02620+K08524+K04451+K08525+K04503+K02620+K04371+K09291+K08525+K07828+K05689+K04365+K09288+K09292+K07827+K04371+K04368+K04368+K05689+K04491+K09292+K09291+K04368+K09288+K04371
Genetic Information Processing	Replication and repair	Non-homologous end-joining	43	ko03450	Unigene013853;Unigene016821;Unigene022957;Unigene034370;Unigene038291;Unigene042125;Unigene044324;Unigene044325;Unigene045125;Unigene045421;Unigene055368;Unigene056505;Unigene057369;Unigene063195;Unigene063197;Unigene065410;Unigene065674;Unigene073384;Unigene073385;Unigene073386;Unigene090750;Unigene091602;Unigene093783;Unigene094549;Unigene095576;Unigene095925;Unigene101381;Unigene102583;Unigene…	K10884+K10865+K04799+K10885+K03512+K10885+K10866+K10866+K10887+K06642+K00977+K04799+K10777+K10865+K10865+K10884+K10980+K06642+K06642+K06642+K10866+K10866+K03513+K04799+K04799+K10865+K10866+K10887+K10887+K10866+K03512+K10865+K10980+K10865+K10885+K10777+K10866+K10887+K10866+K10866+K04799+K10865+K10866
Organismal Systems	Immune system	Complement and coagulation cascades	43	ko04610	Unigene008087;Unigene011811;Unigene029963;Unigene031684;Unigene036791;Unigene036792;Unigene038094;Unigene041325;Unigene067739;Unigene069528;Unigene071858;Unigene074296;Unigene078479;Unigene080650;Unigene082477;Unigene082541;Unigene084919;Unigene087158;Unigene095328;Unigene096989;Unigene100164;Unigene104213;Unigene107954;Unigene110919;Unigene110940;Unigene114530;Unigene114806;Unigene115952;Unigene…	K04008+K04004+K03909+K04004+K04006+K04006+K04007+K03982+K03909+K03902+K04002+K01331+K01348+K01330+K03917+K03901+K03917+K01334+K03902+K04002+K03984+K03985+K03914+K03995+K04002+K03993+K04006+K03903+K03917+K01330+K01324+K04011+K01348+K03994+K01331+K01331+K03914+K01348+K03984+K03917+K03904+K04002+K03985
Organismal Systems	Sensory system	Phototransduction - fly	42	ko04745	Unigene002551;Unigene004907;Unigene010140;Unigene012120;Unigene012122;Unigene015479;Unigene026002;Unigene030603;Unigene031642;Unigene039354;Unigene041958;Unigene042390;Unigene043012;Unigene044217;Unigene045881;Unigene051237;Unigene056737;Unigene056744;Unigene058430;Unigene058431;Unigene061382;Unigene061450;Unigene061453;Unigene061456;Unigene061457;Unigene065950;Unigene065951;Unigene065952;Unigene…	K05692+K05858+K02183+K04634+K02183+K04547+K05692+K05328+K02183+K00910+K13806+K05692+K05692+K04634+K04515+K13806+K05692+K05692+K02677+K02677+K05858+K05692+K05692+K05692+K05692+K05692+K05692+K05692+K04958+K05328+K05692+K05858+K04547+K02183+K13803+K13805+K13805+K04634+K05692+K05858+K05858+K05858
Human Diseases	Immune diseases	Inflammatiory bowel disease (IBD)	42	ko05321	Unigene001691;Unigene006566;Unigene006567;Unigene006957;Unigene011829;Unigene013552;Unigene014592;Unigene017808;Unigene021843;Unigene022728;Unigene029971;Unigene041727;Unigene041926;Unigene041927;Unigene074917;Unigene076367;Unigene083013;Unigene088235;Unigene094787;Unigene097464;Unigene103566;Unigene104623;Unigene110408;Unigene115045;Unigene118695;Unigene120983;Unigene121082;Unigene131523;Unigene…	K04519+K11220+K11220+K05132+K06752+K06752+K02580+K05071+K13375+K04500+K06752+K06752+K10785+K10785+K05133+K05070+K04692+K05070+K08532+K11220+K06752+K05071+K11220+K04519+K04735+K02580+K04448+K04735+K13376+K11220+K04500+K10159+K05482+K13376+K04519+K11225+K04448+K06752+K02580+K06752+K13376+K05071
Organismal Systems	Digestive system	Carbohydrate digestion and absorption	41	ko04973	Unigene004036;Unigene005974;Unigene006200;Unigene012130;Unigene018802;Unigene019398;Unigene021817;Unigene023776;Unigene034613;Unigene037142;Unigene049878;Unigene084658;Unigene085435;Unigene085932;Unigene097873;Unigene098319;Unigene099132;Unigene099778;Unigene100217;Unigene100899;Unigene101686;Unigene109454;Unigene109945;Unigene118261;Unigene122709;Unigene122898;Unigene125380;Unigene126045;Unigene…	K00844+K01229+K00844+K00844+K01540+K00844+K04456+K04456+K01176+K01539+K00844+K00844+K00844+K02649+K00922+K00922+K08171+K02649+K08171+K01540+K01539+K00922+K04456+K00922+K08171+K02649+K02649+K00922+K00922+K00922+K01084+K02649+K02649+K01540+K08171+K00922+K02649+K01229+K02649+K00844+K04456
Human Diseases	Neurodegenerative diseases	Prion diseases	41	ko05020	Unigene001308;Unigene001691;Unigene003470;Unigene004980;Unigene014202;Unigene014203;Unigene016444;Unigene018143;Unigene021233;Unigene021234;Unigene023898;Unigene026250;Unigene026585;Unigene027892;Unigene059040;Unigene074932;Unigene075141;Unigene090617;Unigene096091;Unigene096200;Unigene097906;Unigene105666;Unigene110919;Unigene115045;Unigene115491;Unigene117459;Unigene120475;Unigene122849;Unigene…	K09490+K04519+K04345+K04345+K05703+K05703+K05635+K09490+K04371+K04371+K05634+K02159+K04565+K04369+K06491+K09553+K04375+K02599+K04375+K09203+K04371+K02599+K03995+K04519+K05703+K04375+K05635+K04371+K05703+K04368+K05635+K04368+K03994+K02599+K04519+K09203+K12499+K04368+K04375+K05635+K04371
Organismal Systems	Sensory system	Olfactory transduction	41	ko04740	Unigene003470;Unigene004083;Unigene004980;Unigene007191;Unigene017320;Unigene018352;Unigene018353;Unigene025014;Unigene025410;Unigene026843;Unigene026844;Unigene042431;Unigene042432;Unigene052638;Unigene067286;Unigene069995;Unigene069997;Unigene071663;Unigene071912;Unigene076861;Unigene082993;Unigene084758;Unigene086993;Unigene087410;Unigene099585;Unigene106752;Unigene109605;Unigene110364;Unigene…	K04345+K08043+K04345+K02183+K04515+K08043+K08043+K02183+K02183+K02183+K02183+K02183+K02183+K05027+K05027+K05028+K05027+K05030+K04257+K02183+K02183+K02183+K02183+K02183+K08043+K02183+K04257+K02183+K04257+K02183+K04515+K04257+K02183+K04257+K02183+K08043+K04515+K02183+K04257+K02183+K04257
Organismal Systems	Sensory system	Phototransduction	41	ko04744	Unigene000022;Unigene004228;Unigene007191;Unigene015861;Unigene021102;Unigene025014;Unigene025410;Unigene026843;Unigene026844;Unigene027836;Unigene042431;Unigene042432;Unigene042433;Unigene042434;Unigene042436;Unigene042952;Unigene042953;Unigene044082;Unigene076861;Unigene079289;Unigene082993;Unigene084758;Unigene086993;Unigene087410;Unigene098817;Unigene103679;Unigene106752;Unigene108710;Unigene…	K02183+K02183+K02183+K02183+K02183+K02183+K02183+K02183+K02183+K04536+K02183+K02183+K02183+K02183+K02183+K02183+K02183+K02183+K02183+K02183+K02183+K02183+K02183+K02183+K04439+K04439+K02183+K04631+K02183+K04439+K02183+K02183+K02183+K02183+K02183+K02183+K02183+K02183+K02183+K02183+K02183
Genetic Information Processing	Folding, sorting and degradation	Sulfur relay system	40	ko04122	Unigene013420;Unigene036396;Unigene039503;Unigene049395;Unigene051151;Unigene055322;Unigene058165;Unigene058865;Unigene060316;Unigene060317;Unigene061921;Unigene074953;Unigene074978;Unigene075039;Unigene080603;Unigene081137;Unigene084063;Unigene092524;Unigene094808;Unigene100096;Unigene101318;Unigene102740;Unigene104451;Unigene109759;Unigene109760;Unigene117296;Unigene117342;Unigene119716;Unigene…	K04487+K03635+K04487+K00566+K14168+K03635+K12161+K14169+K03639+K03639+K11996+K00566+K01011+K11996+K11996+K01011+K01011+K01011+K01011+K04487+K04487+K12161+K11996+K03635+K03635+K00566+K14169+K01011+K12161+K12161+K04487+K04487+K11996+K14168+K14169+K04487+K11996+K04487+K14169+K04487
Human Diseases	Substance dependence	Cocaine addiction	40	ko05030	Unigene003470;Unigene004980;Unigene014287;Unigene014592;Unigene017912;Unigene023086;Unigene043562;Unigene080290;Unigene084109;Unigene089560;Unigene096318;Unigene100083;Unigene105980;Unigene106286;Unigene107876;Unigene108023;Unigene112275;Unigene113449;Unigene118695;Unigene119603;Unigene120643;Unigene120983;Unigene121082;Unigene127484;Unigene128474;Unigene131523;Unigene137945;Unigene139269;Unigene…	K04345+K04345+K04450+K02580+K04374+K04630+K04632+K02090+K09049+K04630+K09048+K04630+K09047+K00501+K04450+K09048+K04630+K04605+K04735+K09048+K04450+K02580+K04448+K00274+K00501+K04735+K05870+K00274+K09048+K09048+K09049+K04448+K01593+K00274+K09049+K00274+K02580+K00274+K04355+K09048
Human Diseases	Infectious diseases	Staphylococcus aureus infection	39	ko05150	Unigene001952;Unigene011811;Unigene011829;Unigene013552;Unigene015389;Unigene029971;Unigene031684;Unigene036665;Unigene041727;Unigene041926;Unigene041927;Unigene074296;Unigene076939;Unigene080650;Unigene081273;Unigene085039;Unigene087158;Unigene093386;Unigene100079;Unigene101489;Unigene101526;Unigene103566;Unigene108553;Unigene114530;Unigene118740;Unigene120218;Unigene124365;Unigene124728;Unigene…	K06472+K04004+K06752+K06752+K06856+K06752+K04004+K06856+K06752+K10785+K10785+K01331+K06464+K01330+K06856+K05718+K01334+K06856+K06490+K06461+K06464+K06752+K06464+K03993+K06472+K01330+K06490+K06856+K04172+K03994+K01331+K01331+K05718+K06544+K06856+K06472+K06544+K06752+K06752
Organismal Systems	Excretory system	Proximal tubule bicarbonate reclamation	39	ko04964	Unigene006470;Unigene013585;Unigene018802;Unigene022657;Unigene024398;Unigene031973;Unigene031974;Unigene031975;Unigene034546;Unigene037142;Unigene039473;Unigene043509;Unigene044284;Unigene044612;Unigene044613;Unigene044614;Unigene044615;Unigene044619;Unigene046707;Unigene046708;Unigene054762;Unigene083471;Unigene093551;Unigene098547;Unigene098987;Unigene100899;Unigene101686;Unigene102739;Unigene…	K09864+K09864+K01540+K09864+K00261+K00025+K00025+K00025+K13577+K01539+K09864+K09864+K09864+K09864+K09864+K09864+K09864+K09864+K09864+K09864+K09864+K09864+K01425+K01596+K09864+K01540+K01539+K00025+K13576+K12040+K00261+K09864+K00025+K09864+K18245+K01425+K01425+K01540+K09864
Metabolism	Metabolism of cofactors and vitamins	Ubiquinone and other terpenoid-quinone biosynthesis	37	ko00130	Unigene000878;Unigene003636;Unigene023123;Unigene030510;Unigene040965;Unigene047553;Unigene060759;Unigene061981;Unigene061982;Unigene062447;Unigene062955;Unigene075095;Unigene075125;Unigene075880;Unigene077908;Unigene085650;Unigene090408;Unigene092603;Unigene098746;Unigene102226;Unigene103893;Unigene111047;Unigene119893;Unigene120732;Unigene122920;Unigene126729;Unigene141935;Unigene143843;Unigene…	K00815+K00457+K06127+K05357+K06125+K00457+K00355+K06127+K06127+K00591+K06126+K00815+K06125+K00815+K10106+K00591+K06127+K00457+K00815+K00815+K10106+K01904+K05357+K06126+K00815+K06126+K06127+K05357+K00815+K06125+K06126+K10106+K06127+K10106+K00815+K06126+K00457
Metabolism	Metabolism of other amino acids	Cyanoamino acid metabolism	37	ko00460	Unigene000228;Unigene003756;Unigene015522;Unigene016476;Unigene017031;Unigene018387;Unigene021065;Unigene025177;Unigene028638;Unigene046038;Unigene057767;Unigene070839;Unigene070840;Unigene074689;Unigene075917;Unigene076151;Unigene077853;Unigene082426;Unigene083921;Unigene084958;Unigene086212;Unigene086276;Unigene089130;Unigene091587;Unigene101123;Unigene118423;Unigene121046;Unigene127551;Unigene…	K01501+K00600+K01501+K00600+K00600+K00600+K00600+K00600+K01501+K00600+K18592+K00600+K00600+K01501+K05349+K00600+K01501+K00600+K00600+K00600+K00600+K01501+K00600+K00600+K18592+K05350+K00600+K18592+K01501+K00600+K00600+K00600+K00600+K00600+K05349+K00600+K05349
Metabolism	Glycan biosynthesis and metabolism	Glycosphingolipid biosynthesis - lacto and neolacto series	33	ko00601	Unigene008397;Unigene010211;Unigene018480;Unigene034572;Unigene044529;Unigene046117;Unigene046368;Unigene052688;Unigene058752;Unigene060012;Unigene064645;Unigene071640;Unigene074573;Unigene075221;Unigene084338;Unigene085651;Unigene088257;Unigene095974;Unigene096311;Unigene096971;Unigene101981;Unigene102138;Unigene110293;Unigene118899;Unigene119430;Unigene120079;Unigene122800;Unigene130618;Unigene…	K07969+K00741+K03494+K07966+K03877+K07820+K00741+K07819+K00718+K00718+K00718+K00741+K07968+K07819+K07969+K07969+K07819+K00741+K03766+K07967+K03766+K03766+K00742+K00718+K00742+K07819+K07966+K07969+K03877+K07967+K03494+K00741+K07970
Metabolism	Lipid metabolism	Synthesis and degradation of ketone bodies	31	ko00072	Unigene016264;Unigene037570;Unigene040974;Unigene046907;Unigene046998;Unigene048942;Unigene052545;Unigene065638;Unigene072069;Unigene074493;Unigene087523;Unigene090897;Unigene091413;Unigene098932;Unigene100350;Unigene110421;Unigene111098;Unigene118350;Unigene118735;Unigene119259;Unigene136481;Unigene136655;Unigene136865;Unigene139999;Unigene141003;Unigene142369;Unigene143597;Unigene143999;Unigene…	K00626+K01640+K00019+K00019+K00626+K00626+K01641+K00019+K01027+K01641+K00019+K00019+K01640+K00019+K01641+K01640+K01641+K01640+K01641+K01641+K00019+K01641+K01640+K01640+K00019+K01640+K01641+K01641+K00626+K00626+K00019
Organismal Systems	Endocrine system	Renin-angiotensin system	29	ko04614	Unigene001618;Unigene001831;Unigene010859;Unigene012764;Unigene013836;Unigene015251;Unigene029737;Unigene061664;Unigene098876;Unigene099033;Unigene099635;Unigene102025;Unigene102404;Unigene105388;Unigene105389;Unigene105820;Unigene106036;Unigene113876;Unigene115536;Unigene116386;Unigene117731;Unigene121480;Unigene127925;Unigene133887;Unigene138580;Unigene141129;Unigene161113;Unigene163230;Unigene…	K04166+K13289+K01285+K01257+K11140+K04166+K19514+K01392+K01393+K01257+K13289+K01322+K01392+K01393+K01393+K01322+K01322+K11141+K01285+K01392+K01257+K01322+K11140+K01285+K01393+K01322+K01322+K01393+K01285
Organismal Systems	Digestive system	Fat digestion and absorption	29	ko04975	Unigene005870;Unigene005942;Unigene015481;Unigene016377;Unigene016655;Unigene018569;Unigene020638;Unigene046355;Unigene050929;Unigene082577;Unigene093263;Unigene098132;Unigene098968;Unigene101932;Unigene103560;Unigene104604;Unigene106776;Unigene124445;Unigene135935;Unigene136718;Unigene137689;Unigene139604;Unigene146058;Unigene147437;Unigene151138;Unigene154081;Unigene155532;Unigene159782;Unigene…	K14455+K11155+K14455+K13509+K13509+K14455+K01080+K13885+K14075+K14463+K14463+K01080+K06259+K06259+K01047+K05641+K05641+K14456+K05641+K08745+K11155+K01080+K05641+K05684+K05641+K14455+K14463+K08745+K05641
Metabolism	Glycan biosynthesis and metabolism	Glycosphingolipid biosynthesis - ganglio series	29	ko00604	Unigene002268;Unigene009284;Unigene010503;Unigene013393;Unigene022120;Unigene022121;Unigene041573;Unigene042477;Unigene060891;Unigene062580;Unigene069134;Unigene069809;Unigene088913;Unigene092549;Unigene094259;Unigene099355;Unigene101828;Unigene104760;Unigene111795;Unigene111874;Unigene114524;Unigene118007;Unigene119312;Unigene120351;Unigene125055;Unigene139550;Unigene157658;Unigene159212;Unigene…	K12309+K12373+K03372+K03370+K12373+K12373+K00780+K12373+K12373+K03372+K12373+K12309+K03374+K12373+K12373+K03376+K03368+K03374+K03374+K12373+K12309+K12373+K12373+K03368+K12373+K12373+K12309+K03372+K12373
Organismal Systems	Immune system	Intestinal immune network for IgA production	28	ko04672	Unigene011829;Unigene012414;Unigene012415;Unigene013552;Unigene015389;Unigene021843;Unigene027321;Unigene029971;Unigene036665;Unigene041727;Unigene041926;Unigene041927;Unigene077333;Unigene081273;Unigene084935;Unigene092219;Unigene093386;Unigene093963;Unigene100293;Unigene103566;Unigene108032;Unigene124728;Unigene126521;Unigene148451;Unigene156229;Unigene158823;Unigene160309;Unigene165685	K06752+K06483+K06483+K06752+K06856+K13375+K03159+K06752+K06856+K06752+K10785+K10785+K06483+K06856+K06483+K04466+K06856+K05513+K06483+K06752+K04466+K06856+K04189+K06483+K06856+K04189+K06752+K06752
Organismal Systems	Excretory system	Collecting duct acid secretion	28	ko04966	Unigene000923;Unigene002160;Unigene003961;Unigene011374;Unigene021794;Unigene023931;Unigene074823;Unigene075994;Unigene077311;Unigene091934;Unigene098142;Unigene102370;Unigene102935;Unigene103672;Unigene104383;Unigene104516;Unigene108636;Unigene118054;Unigene123470;Unigene138370;Unigene139049;Unigene139143;Unigene142272;Unigene151201;Unigene152249;Unigene153576;Unigene157115;Unigene160969	K02150+K02155+K02153+K02146+K02151+K13627+K02154+K02154+K02153+K02154+K02154+K02145+K02148+K02151+K02154+K02147+K02154+K02149+K02154+K02154+K02145+K18245+K02152+K02147+K02154+K02154+K02152+K02154
Human Diseases	Endocrine and metabolic diseases	Type I diabetes mellitus	27	ko04940	Unigene001691;Unigene011829;Unigene013552;Unigene014088;Unigene014198;Unigene024037;Unigene027566;Unigene029971;Unigene032093;Unigene041727;Unigene041926;Unigene041927;Unigene064072;Unigene064073;Unigene064074;Unigene064075;Unigene080121;Unigene092716;Unigene098558;Unigene103566;Unigene115045;Unigene134864;Unigene141925;Unigene146738;Unigene156665;Unigene160309;Unigene165685	K04519+K06752+K06752+K04077+K06751+K01580+K01580+K06752+K01580+K06752+K10785+K10785+K06751+K06751+K06751+K06751+K01353+K01580+K01580+K06752+K04519+K01580+K07818+K04519+K01580+K06752+K06752
Metabolism	Amino acid metabolism	Phenylalanine, tyrosine and tryptophan biosynthesis	25	ko00400	Unigene000878;Unigene005870;Unigene015481;Unigene018569;Unigene054880;Unigene066218;Unigene068271;Unigene068272;Unigene068273;Unigene075095;Unigene075880;Unigene098746;Unigene102226;Unigene106429;Unigene108369;Unigene113476;Unigene113921;Unigene114879;Unigene122920;Unigene144252;Unigene154081;Unigene157705;Unigene160034;Unigene160827;Unigene162914	K00815+K14455+K14455+K14455+K14455+K14454+K00500+K00500+K00500+K00815+K00815+K00815+K00815+K14454+K14455+K00500+K00817+K14455+K00815+K00815+K14455+K01694+K14455+K00815+K14454
Metabolism	Lipid metabolism	Primary bile acid biosynthesis	25	ko00120	Unigene031862;Unigene050532;Unigene055205;Unigene084114;Unigene084133;Unigene085011;Unigene088185;Unigene093284;Unigene095329;Unigene105792;Unigene109809;Unigene110997;Unigene116293;Unigene118218;Unigene118998;Unigene120372;Unigene125920;Unigene126548;Unigene129928;Unigene135566;Unigene135802;Unigene150830;Unigene165325;Unigene167530;Unigene168207	K11992+K00489+K00037+K08764+K00251+K12405+K12405+K00488+K07440+K11992+K10223+K11992+K11992+K12408+K00488+K08764+K00488+K11992+K00488+K12405+K07440+K00488+K00488+K01796+K12405
Environmental Information Processing	Signal transduction	MAPK signaling pathway - fly	24	ko04013	Unigene001795;Unigene008434;Unigene012433;Unigene023161;Unigene026905;Unigene032778;Unigene034177;Unigene043442;Unigene045714;Unigene046946;Unigene050805;Unigene052823;Unigene054978;Unigene059330;Unigene061079;Unigene073542;Unigene075749;Unigene076641;Unigene115172;Unigene125911;Unigene128124;Unigene136575;Unigene150934;Unigene159123	K12377+K12377+K04361+K04361+K04361+K04361+K07827+K03211+K04371+K03099+K04364+K12380+K07293+K02644+K04368+K05088+K04361+K04623+K04361+K04371+K02644+K04361+K04368+K04371
Metabolism	Metabolism of cofactors and vitamins	Vitamin B6 metabolism	24	ko00750	Unigene001052;Unigene010458;Unigene013888;Unigene013889;Unigene019308;Unigene036663;Unigene039574;Unigene044084;Unigene056999;Unigene063778;Unigene080429;Unigene082849;Unigene083661;Unigene092702;Unigene099488;Unigene099814;Unigene104983;Unigene105374;Unigene117718;Unigene118129;Unigene134527;Unigene137234;Unigene145419;Unigene157179	K00868+K00831+K05275+K05275+K06215+K00831+K06215+K13248+K00868+K00275+K06215+K13248+K00831+K00868+K00275+K05275+K07758+K00157+K08681+K00275+K08681+K00831+K00868+K07758
Metabolism	Glycan biosynthesis and metabolism	Glycosaminoglycan biosynthesis - keratan sulfate	23	ko00533	Unigene001243;Unigene008397;Unigene010211;Unigene014537;Unigene034572;Unigene041573;Unigene046368;Unigene071640;Unigene073910;Unigene074573;Unigene084338;Unigene085651;Unigene095974;Unigene096971;Unigene098390;Unigene101828;Unigene102448;Unigene120351;Unigene122800;Unigene130618;Unigene141868;Unigene150739;Unigene151541	K00717+K07969+K00741+K00717+K07966+K00780+K00741+K00741+K00717+K07968+K07969+K07969+K00741+K07967+K00717+K03368+K00717+K03368+K07966+K07969+K07967+K00741+K00717
Organismal Systems	Digestive system	Vitamin digestion and absorption	23	ko04977	Unigene005708;Unigene017185;Unigene032084;Unigene046355;Unigene062397;Unigene083424;Unigene084858;Unigene087593;Unigene097949;Unigene102358;Unigene124527;Unigene127884;Unigene132753;Unigene134215;Unigene142949;Unigene145120;Unigene145310;Unigene150876;Unigene151109;Unigene158225;Unigene164491;Unigene165945;Unigene167367	K14616+K14386+K05665+K13885+K05665+K14592+K14609+K14386+K14617+K14616+K14610+K14610+K14617+K14386+K14386+K14619+K14386+K14609+K05665+K14386+K14617+K14609+K14386
Metabolism	Biosynthesis of other secondary metabolites	Caffeine metabolism	22	ko00232	Unigene006471;Unigene033395;Unigene033396;Unigene050485;Unigene052663;Unigene058163;Unigene074826;Unigene077165;Unigene081136;Unigene083547;Unigene101111;Unigene112064;Unigene117493;Unigene119878;Unigene124518;Unigene125908;Unigene132150;Unigene132871;Unigene138015;Unigene157297;Unigene161551;Unigene162567	K00106+K00106+K00106+K00106+K00106+K00106+K00365+K07409+K00106+K00106+K00106+K00106+K00106+K00106+K00365+K00365+K00106+K00106+K00106+K00106+K00106+K00106
Human Diseases	Immune diseases	Autoimmune thyroid disease	22	ko05320	Unigene011829;Unigene013552;Unigene014198;Unigene015389;Unigene029971;Unigene036665;Unigene041727;Unigene041926;Unigene041927;Unigene064072;Unigene064073;Unigene064074;Unigene064075;Unigene080121;Unigene081273;Unigene093386;Unigene103566;Unigene124728;Unigene141925;Unigene156229;Unigene160309;Unigene165685	K06752+K06752+K06751+K06856+K06752+K06856+K06752+K10785+K10785+K06751+K06751+K06751+K06751+K01353+K06856+K06856+K06752+K06856+K07818+K06856+K06752+K06752
Human Diseases	Immune diseases	Allograft rejection	22	ko05330	Unigene011829;Unigene013552;Unigene014198;Unigene015389;Unigene029971;Unigene036665;Unigene041727;Unigene041926;Unigene041927;Unigene064072;Unigene064073;Unigene064074;Unigene064075;Unigene080121;Unigene081273;Unigene093386;Unigene103566;Unigene124728;Unigene141925;Unigene156229;Unigene160309;Unigene165685	K06752+K06752+K06751+K06856+K06752+K06856+K06752+K10785+K10785+K06751+K06751+K06751+K06751+K01353+K06856+K06856+K06752+K06856+K07818+K06856+K06752+K06752
Metabolism	Global and Overview	Degradation of aromatic compounds	21	ko01220	Unigene006737;Unigene012847;Unigene012848;Unigene021449;Unigene049163;Unigene061495;Unigene062530;Unigene066389;Unigene066392;Unigene066393;Unigene084813;Unigene085956;Unigene094897;Unigene103790;Unigene104304;Unigene108849;Unigene110717;Unigene120739;Unigene148543;Unigene150250;Unigene150786	K00121+K00121+K00121+K00002+K01053+K01053+K01053+K00121+K00121+K00121+K00002+K00002+K00121+K00121+K00121+K00121+K00121+K00121+K00121+K00121+K00121
Metabolism	Metabolism of other amino acids	Taurine and hypotaurine metabolism	21	ko00430	Unigene024037;Unigene027566;Unigene029003;Unigene032093;Unigene033844;Unigene054537;Unigene057767;Unigene063808;Unigene083213;Unigene083244;Unigene092716;Unigene094168;Unigene098558;Unigene101123;Unigene112026;Unigene127551;Unigene133266;Unigene134864;Unigene139753;Unigene148715;Unigene156665	K01580+K01580+K10712+K01580+K10712+K00456+K18592+K01580+K10712+K01580+K01580+K10712+K01580+K18592+K10712+K18592+K01580+K01580+K10712+K01594+K01580
Human Diseases	Infectious diseases	Vibrio cholerae infection	20	ko05110	Unigene002326;Unigene004083;Unigene016849;Unigene020250;Unigene023951;Unigene038308;Unigene043562;Unigene074570;Unigene075994;Unigene077311;Unigene092057;Unigene098057;Unigene099585;Unigene100201;Unigene100753;Unigene108636;Unigene117156;Unigene118194;Unigene136142;Unigene145827	K10949+K08043+K03662+K09582+K02677+K10949+K04632+K10950+K02154+K02153+K06098+K10951+K08043+K05701+K08049+K02154+K06098+K01116+K05701+K09582
Human Diseases	Immune diseases	Graft-versus-host disease	19	ko05332	Unigene001691;Unigene011829;Unigene013552;Unigene014198;Unigene029971;Unigene041727;Unigene041926;Unigene041927;Unigene064072;Unigene064073;Unigene064074;Unigene064075;Unigene080121;Unigene103566;Unigene115045;Unigene141925;Unigene146738;Unigene160309;Unigene165685	K04519+K06752+K06752+K06751+K06752+K06752+K10785+K10785+K06751+K06751+K06751+K06751+K01353+K06752+K04519+K07818+K04519+K06752+K06752
Organismal Systems	Sensory system	Taste transduction	18	ko04742	Unigene003470;Unigene004980;Unigene008206;Unigene021802;Unigene043562;Unigene075189;Unigene075792;Unigene075967;Unigene083216;Unigene083477;Unigene109003;Unigene112499;Unigene125586;Unigene126564;Unigene133033;Unigene138963;Unigene145519;Unigene155016	K04345+K04345+K08046+K04960+K04632+K08046+K04960+K08474+K04960+K08046+K04960+K04824+K08046+K04960+K04824+K08046+K08046+K04960
Metabolism	Metabolism of cofactors and vitamins	Thiamine metabolism	16	ko00730	Unigene013420;Unigene039503;Unigene049397;Unigene061910;Unigene100096;Unigene101318;Unigene103105;Unigene107765;Unigene113789;Unigene115903;Unigene126901;Unigene136271;Unigene146930;Unigene161140;Unigene164018;Unigene167020	K04487+K04487+K06928+K00949+K04487+K04487+K06928+K00949+K00949+K00949+K04487+K04487+K04487+K04487+K00949+K04487
Human Diseases	Immune diseases	Asthma	16	ko05310	Unigene011829;Unigene013552;Unigene015389;Unigene029971;Unigene036665;Unigene041727;Unigene041926;Unigene041927;Unigene081273;Unigene089845;Unigene093386;Unigene103566;Unigene124728;Unigene156229;Unigene160309;Unigene165685	K06752+K06752+K06856+K06752+K06856+K06752+K10785+K10785+K06856+K07983+K06856+K06752+K06856+K06856+K06752+K06752
Metabolism	Amino acid metabolism	Lysine biosynthesis	14	ko00300	Unigene007479;Unigene033564;Unigene046602;Unigene053382;Unigene053659;Unigene061521;Unigene104544;Unigene118322;Unigene130755;Unigene139454;Unigene145070;Unigene145404;Unigene154939;Unigene156166	K14085+K00825+K00825+K00825+K00825+K14085+K01586+K00825+K14085+K14085+K00825+K00825+K14085+K00825
Metabolism	Lipid metabolism	Linoleic acid metabolism	14	ko00591	Unigene044002;Unigene044003;Unigene065495;Unigene065496;Unigene068447;Unigene077165;Unigene082439;Unigene083269;Unigene086155;Unigene093937;Unigene101117;Unigene103560;Unigene151519;Unigene159381	K01047+K01047+K07424+K07424+K16342+K07409+K07424+K07424+K07424+K07424+K16817+K01047+K07424+K07418
Human Diseases	Infectious diseases	Epithelial cell signaling in Helicobacter pylori infection	13	ko05120	Unigene016849;Unigene019038;Unigene045224;Unigene051652;Unigene075994;Unigene077311;Unigene086516;Unigene087085;Unigene096863;Unigene100201;Unigene108636;Unigene118194;Unigene136142	K03662+K07210+K04734+K05099+K02154+K02153+K04361+K04441+K04441+K05701+K02154+K01116+K05701
Human Diseases	Infectious diseases	Pathogenic Escherichia coli infection	12	ko05130	Unigene023951;Unigene038437;Unigene047175;Unigene078492;Unigene089537;Unigene101659;Unigene110559;Unigene116168;Unigene116934;Unigene130104;Unigene133146;Unigene160973	K02677+K05719+K07375+K06619+K04391+K12791+K12791+K06106+K12791+K06088+K12791+K07375
Human Diseases	Infectious diseases	Shigellosis	12	ko05131	Unigene000858;Unigene019038;Unigene038437;Unigene045224;Unigene078492;Unigene083782;Unigene087085;Unigene096863;Unigene116168;Unigene151382;Unigene158456;Unigene167125	K04438+K07210+K05719+K04734+K06619+K05748+K04441+K04441+K06106+K08846+K06484+K04371
Metabolism	Metabolism of other amino acids	D-Glutamine and D-glutamate metabolism	12	ko00471	Unigene015330;Unigene024398;Unigene026183;Unigene026184;Unigene051378;Unigene054104;Unigene054105;Unigene059740;Unigene093551;Unigene120642;Unigene141651;Unigene141652	K01425+K00261+K00261+K00261+K01425+K00261+K00261+K01425+K01425+K00261+K01425+K01425
Metabolism	Amino acid metabolism	Valine, leucine and isoleucine biosynthesis	10	ko00290	Unigene017485;Unigene034373;Unigene038518;Unigene038519;Unigene075010;Unigene075632;Unigene076490;Unigene104226;Unigene118087;Unigene145013	K00826+K17989+K00826+K00826+K01702+K00826+K17989+K17989+K01754+K01754
Metabolism	Metabolism of cofactors and vitamins	Riboflavin metabolism	10	ko00740	Unigene004639;Unigene048371;Unigene049230;Unigene049231;Unigene058594;Unigene058595;Unigene112538;Unigene152165;Unigene152975;Unigene155972	K00953+K00953+K00953+K00953+K00861+K00861+K00953+K00861+K05901+K00861
Human Diseases	Endocrine and metabolic diseases	Maturity onset diabetes of the young	10	ko04950	Unigene077980;Unigene082721;Unigene085721;Unigene088954;Unigene121289;Unigene123521;Unigene136085;Unigene140816;Unigene151833;Unigene164216	K08036+K08037+K12406+K06054+K08035+K07292+K08036+K07292+K08024+K12406
Metabolism	Metabolism of terpenoids and polyketides	Insect hormone biosynthesis	9	ko00981	Unigene006940;Unigene008131;Unigene022907;Unigene038561;Unigene043721;Unigene055496;Unigene063751;Unigene106781;Unigene160402	K14938+K14985+K14938+K14938+K10722+K14985+K10719+K10721+K14985
Organismal Systems	Environmental adaptation	Circadian rhythm - fly	9	ko04711	Unigene029252;Unigene045036;Unigene048557;Unigene050931;Unigene053454;Unigene056423;Unigene061105;Unigene149507;Unigene157067	K03083+K02223+K02223+K02296+K12114+K12074+K02633+K03083+K03083
Metabolism	Biosynthesis of other secondary metabolites	Butirosin and neomycin biosynthesis	8	ko00524	Unigene004036;Unigene006200;Unigene012130;Unigene019398;Unigene049878;Unigene084658;Unigene085435;Unigene164352	K00844+K00844+K00844+K00844+K00844+K00844+K00844+K00844
Metabolism	Metabolism of cofactors and vitamins	Lipoic acid metabolism	7	ko00785	Unigene012054;Unigene051781;Unigene051789;Unigene064908;Unigene077850;Unigene078549;Unigene124530	K03644+K10105+K03644+K03801+K03644+K03644+K03644
Metabolism	Metabolism of cofactors and vitamins	Biotin metabolism	7	ko00780	Unigene064280;Unigene066219;Unigene082641;Unigene094430;Unigene100428;Unigene124293;Unigene130940	K01942+K09458+K09458+K01942+K01942+K09458+K01942
Human Diseases	Substance dependence	Nicotine addiction	2	ko05033	Unigene001092;Unigene080040	K05192+K05181
Metabolism	Metabolism of other amino acids	D-Arginine and D-ornithine metabolism	1	ko00472	Unigene051407	K00273
